# Supplementary material
Source: PubMed Central journal article supplement (PMC3832790)
Supplement: NIHMS498644-supplement-Supplemental_Material.pdf [file NIHMS498644-supplement-Supplemental_Material.pdf]

**Supplementary information for: Identification of 23 new prostate cancer susceptibility loci using the iCOGS custom genotyping array.**

**Supplementary Table 1: Number of cases and controls by study and population**

| No | Study                         | Genotyped samples |               |               | Samples included in final analysis<br>(after QC and<br>without samples genotyped in previous scans) |               |               |                |            |              |
|----|-------------------------------|-------------------|---------------|---------------|-----------------------------------------------------------------------------------------------------|---------------|---------------|----------------|------------|--------------|
|    |                               |                   |               |               | European                                                                                            |               |               | African/Mix Af |            |              |
|    |                               | Co                | Ca            | Total         | Co                                                                                                  | Ca            | Total         | Co             | Ca         | Total        |
| 1  | CAPS                          | 677               | 1,197         | 1,874         | 271                                                                                                 | 408           | 679           |                |            |              |
| 2  | CPCS1                         | 2,777             | 872           | 3,649         | 2,657                                                                                               | 841           | 3,498         |                |            |              |
| 3  | CPCS2                         | 798               | 306           | 1,104         | 762                                                                                                 | 255           | 1,017         |                |            |              |
| 4  | EPIC Germany <sup>1</sup>     | 302               | 244           | 546           | 302                                                                                                 | 228           | 530           |                |            |              |
| 5  | EPIC Greece <sup>1</sup>      | 23                | 25            | 48            | 23                                                                                                  | 25            | 48            |                |            |              |
| 6  | EPIC Italy <sup>1</sup>       | 97                | 70            | 167           | 97                                                                                                  | 69            | 166           |                |            |              |
| 7  | EPIC Netherlands <sup>1</sup> | 20                | 17            | 37            | 18                                                                                                  | 17            | 35            |                |            |              |
| 8  | EPIC-Norfolk                  | 1,136             | 528           | 1,664         | 1,111                                                                                               | 511           | 1,622         |                |            |              |
| 9  | EPIC Oxford <sup>1</sup>      | 51                | 34            | 85            | 51                                                                                                  | 32            | 83            |                |            |              |
| 10 | EPIC Spain <sup>1</sup>       | 107               | 97            | 204           | 105                                                                                                 | 94            | 199           |                |            |              |
| 11 | EPIC Sweden <sup>1</sup>      | 299               | 231           | 530           | 289                                                                                                 | 219           | 508           |                |            |              |
| 12 | ESTHER                        | 334               | 322           | 656           | 318                                                                                                 | 313           | 631           |                |            |              |
| 13 | FHCRC                         | 707               | 683           | 1,390         | 637                                                                                                 | 604           | 1,241         | 51             | 57         | 108          |
| 14 | IPO-Porto                     | 88                | 187           | 275           | 66                                                                                                  | 183           | 249           |                |            |              |
| 15 | MAYO                          | 391               | 614           | 1,005         | 384                                                                                                 | 601           | 985           |                |            |              |
| 16 | MCCS <sup>2</sup>             | 1,233             | 389           | 1,622         | 1,180                                                                                               | 359           | 1,539         |                |            |              |
| 17 | MEC                           | 895               | 890           | 1,785         | 597                                                                                                 | 586           | 1,183         |                |            |              |
| 18 | MOFFITT                       | 138               | 490           | 628           | 100                                                                                                 | 414           | 514           | 30             | 41         | 71           |
| 19 | PCFS <sup>2</sup>             | 13                | 1,409         | 1,422         | 3                                                                                                   | 1,326         | 1,329         |                |            |              |
| 20 | PCMUS                         | 145               | 152           | 297           | 140                                                                                                 | 151           | 291           |                |            |              |
| 21 | Poland                        | 472               | 453           | 925           | 359                                                                                                 | 438           | 797           |                |            |              |
| 22 | ProMPT                        | 2                 | 187           | 189           | 2                                                                                                   | 166           | 168           |                |            |              |
| 23 | ProtecT                       | 1,498             | 1,624         | 3,122         | 1,474                                                                                               | 1,563         | 3,037         |                |            |              |
| 24 | QLD                           | 94                | 187           | 281           | 87                                                                                                  | 186           | 273           |                |            |              |
| 25 | SCCS                          | 510               | 545           | 1,055         | 0                                                                                                   | 0             | 0             | 488            | 525        | 1,013        |
| 26 | SEARCH                        | 1,290             | 1,468         | 2,758         | 1,244                                                                                               | 1,371         | 2,615         |                |            |              |
| 27 | STHM1                         | 2,330             | 2,056         | 4,386         | 2,224                                                                                               | 2,006         | 4,230         |                |            |              |
| 28 | TAMPERE                       | 2,769             | 2,836         | 5,605         | 2,413                                                                                               | 2,754         | 5,167         |                |            |              |
| 29 | UKGPCS                        | 4,314             | 4,900         | 9,214         | 2,193                                                                                               | 2,859         | 5,052         |                |            |              |
| 30 | ULM                           | 506               | 609           | 1,115         | 354                                                                                                 | 603           | 957           |                |            |              |
| 31 | UTAH                          | 256               | 454           | 710           | 254                                                                                                 | 440           | 694           |                |            |              |
| 32 | WUGS                          | 0                 | 998           | 998           | 0                                                                                                   | 0             | 0             |                |            |              |
|    | <b>Total</b>                  | <b>24,272</b>     | <b>25,074</b> | <b>49,346</b> | <b>19,715</b>                                                                                       | <b>19,622</b> | <b>39,337</b> | <b>569</b>     | <b>623</b> | <b>1,192</b> |

<sup>1</sup> Subsets from the international EPIC study

<sup>2</sup> Studies from the Melbourne group

Co =Controls

Ca= Cases

**Supplementary Table 2:** Disease-specific odds ratios for Indolent and Aggressive disease each versus controls and case only analysis (Indolent vs. Aggressive) using samples with Europeans ancestry.

| Marker     | Indolent         | Aggressive       | Case only analysis | <i>P</i> -value |
|------------|------------------|------------------|--------------------|-----------------|
| rs1218582  | 1.06 (1.03-1.09) | 1.08 (1.02-1.14) | 1.01 (.96-1.08)    | .55             |
| rs4245739  | .91 (.88-.95)    | .91 (.85-.97)    | 1.00 (.98-1.29)    | .97             |
| rs11902236 | 1.07 (1.03-1.11) | 1.06 (.99-1.13)  | .99 (.93-1.05)     | .69             |
| rs3771570  | 1.14 (1.09-1.19) | 1.02 (.95-1.10)  | .90 (.83-.97)      | .007            |
| rs7611694  | .90 (.87-.93)    | .94 (.89-.99)    | 1.05 (.99-1.11)    | .12             |
| rs1894292  | .92 (.89-.95)    | .90 (.85-.95)    | .99 (.93-1.04)     | .65             |
| rs6869841  | 1.08 (1.04-1.12) | 1.04 (.97-1.12)  | .96 (.90-1.03)     | .26             |
| rs3096702  | 1.08 (1.04-1.11) | 1.05 (.99-1.11)  | .98 (.92-1.03)     | .41             |
| rs2273669  | 1.08 (1.04-1.13) | .99 (.92-1.08)   | .90 (.83-.97)      | .01             |
| rs1933488  | .89 (.86-.91)    | .91 (.86-.96)    | 1.03 (.97-1.09)    | .30             |
| rs12155172 | 1.10 (1.06-1.14) | 1.16 (1.09-1.24) | 1.04 (.97-1.11)    | .27             |
| rs11135910 | 1.11 (1.06-1.16) | 1.10 (1.02-1.19) | 1.01 (.93-1.09)    | .82             |
| rs3850699  | .91 (.88-.94)    | .94 (.88-1.00)   | 1.02 (.96-1.09)    | .43             |
| rs11568818 | .91 (.88-.94)    | .92 (.87-.97)    | 1.01 (.96-1.07)    | .62             |
| rs1270884  | 1.07 (1.04-1.11) | 1.02 (.97-1.08)  | .94 (.89-.99)      | .03             |
| rs8008270  | .89 (.86-.93)    | .89 (.83-.96)    | 1.01 (.94-1.09)    | .71             |
| rs7141529  | 1.08 (1.05-1.12) | 1.11 (1.05-1.17) | 1.03 (.97-1.09)    | .31             |
| rs684232   | 1.10 (1.07-1.14) | 1.10 (1.04-1.16) | .99 (.93-1.05)     | .73             |
| rs11650494 | 1.14 (1.08-1.21) | 1.20 (1.08-1.33) | 1.04 (.94-1.16)    | .41             |
| rs7241993  | .92 (.89-.95)    | .92 (.87-.98)    | .99 (.93-1.06)     | .79             |
| rs2427345  | .93 (.90-.96)    | .97 (.91-1.02)   | 1.05 (.99-1.11)    | .11             |
| rs6062509  | .90 (.87-.93)    | .85 (.80-.90)    | .94 (.89-1.00)     | .07             |
| rs2405942  | .89 (.84-.94)    | .82 (.74-.90)    | .92 (.83-1.02)     | .10             |

*P* trend for difference in the per-allele OR (see methods).

**Supplementary Table 3: Geometric mean PSA levels by genotype in controls (Samples with European ancestry)**

| Marker     | Geometric mean PSA (95%CI) |                  |                  | P-value <sup>1</sup> |
|------------|----------------------------|------------------|------------------|----------------------|
| rs1218582  | AA                         | AG               | GG               | .64                  |
|            | 1.95 (1.85-2.05)           | 1.93 (1.85-2.01) | 2.08 (1.93-2.24) |                      |
| rs4245739  | AA                         | AC               | CC               | .49                  |
|            | 1.97 (1.89-2.05)           | 1.95 (1.85-2.04) | 2.05 (1.82-2.27) |                      |
| rs11902236 | GG                         | GA               | AA               | .89                  |
|            | 1.95 (1.87-2.02)           | 2.00 (1.90-2.11) | 1.91 (1.70-2.11) |                      |
| rs3771570  | GG                         | GA               | AA               | .98                  |
|            | 1.98 (1.91-2.05)           | 1.95 (1.84-2.06) | 1.73 (1.42-2.04) |                      |
| rs7611694  | AA                         | AC               | CC               | .23                  |
|            | 1.95 (1.86-2.05)           | 2.00 (1.91-2.09) | 1.90 (1.77-2.04) |                      |
| rs1894292  | GG                         | GA               | AA               | .70                  |
|            | 1.93 (1.81-2.04)           | 1.98 (1.90-2.06) | 1.99 (1.86-2.12) |                      |
| rs6869841  | GG                         | GA               | AA               | .0001                |
|            | 1.90 (1.83-1.98)           | 2.03 (1.93-2.13) | 2.36 (2.05-2.68) |                      |
| rs3096702  | GG                         | GA               | AA               | .26                  |
|            | 1.92 (1.83-2.01)           | 1.96 (1.87-2.04) | 2.13 (1.95-2.32) |                      |
| rs2273669  | AA                         | AG               | GG               | .87                  |
|            | 1.97 (1.91-2.05)           | 1.93 (1.81-2.04) | 2.00 (1.57-2.42) |                      |
| rs1933488  | AA                         | AG               | GG               | .12                  |
|            | 1.97 (1.88-2.07)           | 2.00 (1.91-2.09) | 1.86 (1.71-2.00) |                      |
| rs12155172 | GG                         | GA               | AA               | .10                  |
|            | 1.92 (1.84-1.99)           | 2.05 (1.94-2.16) | 2.01 (1.75-2.26) |                      |
| rs11135910 | GG                         | GA               | AA               | .84                  |
|            | 1.94 (1.87-2.01)           | 2.02 (1.90-2.13) | 2.11 (1.34-2.88) |                      |
| rs3850699  | AA                         | AG               | GG               | .39                  |
|            | 1.97 (1.88-2.05)           | 1.96 (1.87-2.04) | 2.02 (1.82-2.22) |                      |
| rs11568818 | AA                         | AG               | GG               | .08                  |
|            | 1.95 (1.84-2.07)           | 1.93 (1.85-2.01) | 2.06 (1.93-2.19) |                      |
| rs1270884  | GG                         | GA               | AA               | .02                  |
|            | 1.88 (1.76-2.00)           | 1.97 (1.89-2.05) | 2.05 (1.92-2.17) |                      |
| rs8008270  | GG                         | GA               | AA               | .07                  |
|            | 2.01 (1.93-2.08)           | 1.87 (1.77-1.97) | 2.05 (1.69-2.42) |                      |
| rs7141529  | AA                         | AG               | GG               | .36                  |
|            | 2.05 (1.92-2.18)           | 1.95 (1.87-2.03) | 1.91 (1.80-2.03) |                      |
| rs684232   | AA                         | AG               | GG               | .43                  |
|            | 1.98 (1.89-2.08)           | 1.96 (1.88-2.05) | 1.92 (1.76-2.09) |                      |
| rs11650494 | GG                         | GA               | AA               | .77                  |
|            | 1.97 (1.91-2.04)           | 1.91 (1.76-2.06) | 2.19 (1.52-2.86) |                      |
| rs7241993  | GG                         | GA               | AA               | .66                  |
|            | 2.00 (1.91-2.08)           | 1.90 (1.81-2.00) | 2.07 (1.87-2.26) |                      |
| rs2427345  | GG                         | GA               | AA               | .48                  |
|            | 2.03 (1.93-2.14)           | 1.91 (1.83-1.99) | 1.97 (1.82-2.13) |                      |
| rs6062509  | AA                         | AC               | CC               | .35                  |
|            | 1.99 (1.90-2.08)           | 1.95 (1.86-2.04) | 1.91 (1.73-2.09) |                      |
| rs2405942  | AA                         | AG               | GG               | .60                  |
|            | 1.98 (1.91-2.05)           | NA               | 1.91 (1.79-2.03) |                      |

<sup>1</sup> Test for trend in log (PSA) by allele dose.

**Supplementary Table 4:** Family history-specific odds ratios (Samples with European ancestry)

| Marker     | No Family history | With Family history | Ptrend <sup>1</sup> |
|------------|-------------------|---------------------|---------------------|
| rs1218582  | 1.06 (1.03-1.09)  | 1.05 (.99-1.11)     | .81                 |
| rs4245739  | .91 (.88-.94)     | .95 (.89-1.02)      | .42                 |
| rs11902236 | 1.07 (1.03-1.10)  | 1.08 (1.01-1.15)    | .85                 |
| rs3771570  | 1.11 (1.06-1.16)  | 1.19 (1.10-1.29)    | .04                 |
| rs7611694  | .90 (.88-.93)     | .92 (.86-.98)       | .46                 |
| rs1894292  | .92 (.89-.94)     | .89 (.84-.95)       | .30                 |
| rs6869841  | 1.07 (1.03-1.11)  | 1.10 (1.02-1.18)    | .86                 |
| rs3096702  | 1.07 (1.04-1.11)  | 1.03 (.97-1.10)     | .56                 |
| rs2273669  | 1.06 (1.02-1.11)  | 1.12 (1.03-1.22)    | .18                 |
| rs1933488  | .89 (.87-.92)     | .87 (.81-.92)       | .80                 |
| rs12155172 | 1.10 (1.07-1.14)  | 1.12 (1.05-1.21)    | .30                 |
| rs11135910 | 1.10 (1.05-1.14)  | 1.17 (1.08-1.27)    | .03                 |
| rs3850699  | .92 (.89-.95)     | .86 (.80-.92)       | .07                 |
| rs11568818 | .91 (.88-.94)     | .90 (.85-.96)       | .85                 |
| rs1270884  | 1.07 (1.03-1.10)  | 1.08 (1.01-1.15)    | .95                 |
| rs8008270  | .89 (.86-.93)     | .91 (.84-.98)       | .93                 |
| rs7141529  | 1.09 (1.05-1.12)  | 1.10 (1.03-1.16)    | .93                 |
| rs684232   | 1.10 (1.06-1.13)  | 1.14 (1.07-1.22)    | .23                 |
| rs11650494 | 1.14 (1.08-1.21)  | 1.17 (1.05-1.30)    | .17                 |
| rs7241993  | .92 (.89-.95)     | .93 (.87-.99)       | .88                 |
| rs2427345  | .93 (.90-.96)     | .99 (.93-1.05)      | .26                 |
| rs6062509  | .89 (.86-.92)     | .88 (.82-.94)       | .86                 |
| rs2405942  | .88 (.84-.93)     | .85 (.76-.95)       | .52                 |

<sup>1</sup>P for difference in the per-allele OR (see methods).

**Supplementary Table 5:** Age-specific odds ratios for each SNP (Samples with European ancestry)

| Marker     | Age at diagnosis (years) |                  |                  |                  |                  | Ptrend <sup>1</sup> |
|------------|--------------------------|------------------|------------------|------------------|------------------|---------------------|
|            | <55                      | 55-59            | 60-64            | 65-69            | 70+              |                     |
| rs1218582  | 1.05 (.99-1.13)          | 1.07 (1.02-1.13) | 1.07 (1.02-1.12) | 1.08 (1.03-1.13) | 1.04 (.99-1.09)  | .46                 |
| rs4245739  | .90 (.84-.98)            | .91 (.85-.96)    | .92 (.87-.98)    | .94 (.89-.99)    | .90 (.85-.95)    | .54                 |
| rs11902236 | 1.11 (1.03-1.19)         | 1.05 (.99-1.12)  | 1.03 (.98-1.09)  | 1.06 (1.01-1.12) | 1.11 (1.06-1.18) | .07                 |
| rs3771570  | 1.20 (1.10-1.32)         | 1.12 (1.04-1.20) | 1.08 (1.01-1.16) | 1.14 (1.07-1.22) | 1.09 (1.02-1.17) | .05                 |
| rs7611694  | .85 (.79-.91)            | .89 (.85-.94)    | .92 (.88-.96)    | .90 (.86-.94)    | .94 (.90-.99)    | .02                 |
| rs1894292  | .90 (.84-.97)            | .92 (.87-.97)    | .89 (.85-.93)    | .92 (.88-.97)    | .93 (.88-.97)    | .32                 |
| rs6869841  | 1.18 (1.09-1.28)         | 1.09 (1.02-1.16) | 1.11 (1.05-1.18) | 1.04 (.98-1.10)  | 1.03 (.97-1.09)  | .01                 |
| rs3096702  | 1.10 (1.02-1.18)         | 1.12 (1.06-1.18) | 1.06 (1.01-1.12) | 1.07 (1.02-1.12) | 1.02 (.97-1.07)  | .005                |
| rs2273669  | 1.01 (.92-1.12)          | 1.12 (1.05-1.21) | 1.06 (.99-1.13)  | 1.06 (.99-1.13)  | 1.09 (1.01-1.16) | .73                 |
| rs1933488  | .86 (.80-.92)            | .89 (.85-.94)    | .88 (.83-.92)    | .90 (.85-.94)    | .89 (.85-.93)    | .70                 |
| rs12155172 | 1.12 (1.04-1.21)         | 1.11 (1.04-1.18) | 1.07 (1.01-1.13) | 1.11 (1.05-1.17) | 1.13 (1.07-1.20) | .53                 |
| rs11135910 | 1.12 (1.02-1.22)         | 1.12 (1.04-1.21) | 1.11 (1.04-1.19) | 1.12 (1.05-1.20) | 1.06 (.99-1.13)  | .37                 |
| rs3850699  | .88 (.82-.95)            | .93 (.87-.98)    | .91 (.86-.96)    | .90 (.86-.95)    | .93 (.88-.98)    | .63                 |
| rs11568818 | .92 (.86-.99)            | .94 (.89-.99)    | .87 (.83-.91)    | .91 (.87-.95)    | .93 (.89-.98)    | .85                 |
| rs1270884  | 1.08 (1.01-1.16)         | 1.08 (1.02-1.14) | 1.07 (1.02-1.12) | 1.08 (1.03-1.13) | 1.05 (1.00-1.10) | .45                 |
| rs8008270  | .84 (.77-.92)            | .88 (.82-.94)    | .90 (.84-.96)    | .93 (.88-.99)    | .88 (.83-.94)    | .14                 |
| rs7141529  | 1.08 (1.01-1.16)         | 1.09 (1.03-1.15) | 1.11 (1.06-1.17) | 1.08 (1.03-1.13) | 1.07 (1.02-1.12) | .65                 |
| rs684232   | 1.21 (1.13-1.29)         | 1.16 (1.10-1.23) | 1.07 (1.02-1.13) | 1.08 (1.03-1.14) | 1.06 (1.01-1.12) | .0002               |
| rs11650494 | 1.20 (1.07-1.35)         | 1.08 (.98-1.19)  | 1.19 (1.10-1.30) | 1.12 (1.03-1.22) | 1.14 (1.05-1.25) | .12                 |
| rs7241993  | .88 (.83-.96)            | .87 (.82-.93)    | .94 (.89-.99)    | .93 (.89-.98)    | .95 (.90-1.00)   | .02                 |
| rs2427345  | .93 (.87-1.00)           | .91 (.86-.96)    | .95 (.90-.99)    | .96 (.92-1.01)   | .92 (.88-.97)    | .09                 |
| rs6062509  | .86 (.80-.93)            | .85 (.81-.91)    | .89 (.85-.94)    | .90 (.85-.95)    | .91 (.86-.95)    | .12                 |
| rs2405942  | .83 (.74-.94)            | .82 (.75-.90)    | .89 (.82-.97)    | .88 (.81-.96)    | .93 (.86-1.01)   | .89                 |

<sup>1</sup> Idf trend test for trend in OR by age, using case only analysis

**Supplementary Table 6.** Genes in flanking regions of 23 novel tagSNPs

| #  | Chr  | tagSNP     | Genes in Intersection. LD R-squared 0.2 or 250KB flank.                                                                                                                                                                                                                                                                                  | Additional genes in 1MB Flank                                                                                                                                                                  |
|----|------|------------|------------------------------------------------------------------------------------------------------------------------------------------------------------------------------------------------------------------------------------------------------------------------------------------------------------------------------------------|------------------------------------------------------------------------------------------------------------------------------------------------------------------------------------------------|
| 1  | chr1 | rs1218582  | <i>ADAM15, ADAR, CKS1B, DCST1, DCST2, DPM3, EFNA1, EFNA3, EFNA4, FLAD1, KCNN3, LENEP, LOC10050, LOC100505666, MIR4258, PBXIP1, PMVK, PYGO2, SHC1, SLC50A1, ZBTB7B,</i>                                                                                                                                                                   | <i>ASH1L, CHRNB2, CLK2, FAM189B, FDPS, GBA, GBAP1, HCN3, IL6R, IL6R, KRTCAP2, MIR555, MIR92B, MTX1, MUC1, PKLR, RUSC1, RUSC1-AS1, SCAMP3, SHE, TDRD10, THBS3, TRIM46, UBE2Q1,</i>              |
| 2  | chr1 | rs4245739  | <i>LOC127841, LRRN2, MDM4, PIK3C2B, PLEKHA6, PPP1R15B,</i>                                                                                                                                                                                                                                                                               | <i>CNTN2, ETNK2, GOLT1A, KISS1, NFASC, NFASC, REN, SOX13,</i>                                                                                                                                  |
| 3  | chr2 | rs11902236 | <i>C2orf48, CYS1, GRHL1, KLF11, MIR4261, RRM2, TAF1B,</i>                                                                                                                                                                                                                                                                                | <i>ADAM17, HPCAL1, IAH1, ODC1, SNORA80B, YWHAQ,</i>                                                                                                                                            |
| 4  | chr2 | rs3771570  | <i>ANO7, ATG4B, BOK, BOK-AS1, DTYMK, FARP2, HDLBP, SEP2, STK25, THAP4,</i>                                                                                                                                                                                                                                                               | <i>CXXC11, D2HGDH, GAL3ST2, ING5, LOC200772, MTERFD2, NEU4, PASK, PASK, PDCD1, PPP1R7, SEPT2, SNED1, THAP4,</i>                                                                                |
| 5  | chr3 | rs7611694  | <i>ATP6V1A, BOC, KIAA2018, MIR4446, NAA50, SIDT1, SPICE1, WDR52, WDR52-AS, WDR52-AS1,</i>                                                                                                                                                                                                                                                | <i>GRAMD1C, GRAMD1C, KIAA1407, QTRTD1, WDR52, ZDHHC23,</i>                                                                                                                                     |
| 6  | chr4 | rs1894292  | <i>AFM, AFP, ALB, ANKRD17, COX18, LOC72804, LOC728040, RASSF6,</i>                                                                                                                                                                                                                                                                       | <i>CXCL1, CXCL6, IL8, PF4, PF4V1,</i>                                                                                                                                                          |
| 7  | chr5 | rs6869841  | <i>BOD1, LOC285593, STC2,</i>                                                                                                                                                                                                                                                                                                            | <i>ATP6V0E1, BNIP1, C5orf47, CPEB4, CREBRF, CREBRF, NKX2-5, SNORA74B,</i>                                                                                                                      |
| 8  | chr6 | rs1933488  | <i>FBXO5, MTRF1L, RGS17,</i>                                                                                                                                                                                                                                                                                                             | <i>MYCT1, SYNE1, VIP,</i>                                                                                                                                                                      |
| 9  | chr6 | rs2273669  | <i>ARMC2, CEP57L1, FOXO3, LACE1, LINC0022, LINC00222, SESN1,</i>                                                                                                                                                                                                                                                                         | <i>CCDC162P, CD164, MICAL1, PPIL6, SESN1, SMPD2, ZBTB24,</i>                                                                                                                                   |
| 10 | chr6 | rs3096702  | <i>AGER, AGPAT1, ATF6B, BTNL2, C2, C4A, C4B, C6orf10, CFB, CYP21A1P, CYP21A2, DOM3Z, EGFL8, FKBPL, GPSM3, HCG23, HLA-DQA1, HLA-DQB1, HLA-DRA, HLA-DRB1, HLA-DRB5, HLA-DRB6, LOC10029, LOC100293534, LOC10050, LOC100507547, MIR1236, NOTCH4, PBX2, PPT2, PPT2-EGF, PPT2-EGFL8, PRRT1, RDBP, RNF5, RNF5P1, SKIV2L, STK19, TNXA, TNXB,</i> | <i>C2, C4A, C4B, C6orf25, C6orf48, CLIC1, DDAH2, EHMT2, HSPA1A, HSPA1B, HSPA1L, LOC100293534, LSM2, MSH5, MSH5-SAPCD1, NEU1, SAPCD1, SLC44A4, SNORD48, SNORD52, STK19, VARS, VWA7, ZBTB12,</i> |
| 11 | chr7 | rs12155172 | <i>ABC5, RPL23P8, SP8,</i>                                                                                                                                                                                                                                                                                                               | <i>ABC5, SP4,</i>                                                                                                                                                                              |
| 12 | chr8 | rs11135910 | <i>EBF2,</i>                                                                                                                                                                                                                                                                                                                             | <i>BNIP3L, DPYSL2, PNMA2, PPP2R2A,</i>                                                                                                                                                         |

|    |       |            |                                                                                                                                                                                                                                                                                                  |                                                                                                                                                                                                                                 |
|----|-------|------------|--------------------------------------------------------------------------------------------------------------------------------------------------------------------------------------------------------------------------------------------------------------------------------------------------|---------------------------------------------------------------------------------------------------------------------------------------------------------------------------------------------------------------------------------|
| 13 | chr10 | rs3850699  | <i>ACTR1A, ARL3, AS3MT, C10orf32, C10orf32-AS3MT, C10orf95, CNNM2, CUEDC2, CYP17A1, FBXL15, LOC100505761, MIR146B, PSD, SFXN2, SUFU, TMEM180, TRIM8, WBP1L,</i>                                                                                                                                  | <i>C10orf26, CNNM2, ELOVL3, GBF1, NFKB2, NOLC1, NT5C2, PITX3,</i>                                                                                                                                                               |
| 14 | chr11 | rs11568818 | <i>BIRC2, BIRC3, MMP10, MMP20, MMP27, MMP7, MMP8, TMEM123, YAP1,</i>                                                                                                                                                                                                                             | <i>C11orf70, LOC100288077, MMP1, MMP12, MMP13, MMP3,</i>                                                                                                                                                                        |
| 15 | chr12 | rs1270884  | <i>LOC255480, TBX5,</i>                                                                                                                                                                                                                                                                          | <i>RBM19, TBX3,</i>                                                                                                                                                                                                             |
| 16 | chr14 | rs7141529  | <i>ACTN1, RAD51B, ZFP36L1,</i>                                                                                                                                                                                                                                                                   | <i>DCAF5,</i>                                                                                                                                                                                                                   |
| 17 | chr14 | rs8008270  | <i>DDHD1, ERO1L, FERMT2, GNPAT1, GPR137C, PSMC6, STYX, TXNDC16,</i>                                                                                                                                                                                                                              | -                                                                                                                                                                                                                               |
| 18 | chr17 | rs11650494 | <i>ZNF652, ABI3, B4GALNT2, FLJ40194, GNGT2, IGF2BP1, NGFR, PHB, PHOSPHO1,</i>                                                                                                                                                                                                                    | <i>ATP5G1, CALCOCO2, FAM117A, GIP, NXPH3, SLC35B1, SNF8, SPOP, TTLL6, UBE2Z, HOXB13, PRAC,</i>                                                                                                                                  |
| 19 | chr17 | rs684232   | <i>DBIL5P, FAM57A, GEMIN4, GLOD4, NXN, RNMTL1, VPS53,</i>                                                                                                                                                                                                                                        | <i>ABR, ABR, C17orf97, FAM101B, LOC100506388, MIR3183, RPH3AL, TIMM22,</i>                                                                                                                                                      |
| 20 | chr18 | rs7241993  | <i>ATP9B, SALL3,</i>                                                                                                                                                                                                                                                                             | <i>NFATC1,</i>                                                                                                                                                                                                                  |
| 21 | chr20 | rs2427345  | <i>ADRM1, C20orf15, C20orf151, C20orf166, C20orf166-AS1, CABLES2, GATA5, GTPBP5, HRH3, LAMA5, MIR1-1, MIR133A2, MIR4758, OSBPL2, RPS21,</i>                                                                                                                                                      | <i>C20orf20, CDH4, COL9A3, DPH3P1, LOC100127888, LOC100652730, LSM14B, MIR1257, NTSR1, OGFR, PSMA7, SLCO4A1, SS18L1, TAF4, TCFL5,</i>                                                                                           |
| 22 | chr20 | rs6062509  | <i>ABHD16B, ARFRP1, C20orf195, DNAJC5, EEF1A2, GMEB2, LIME1, LOC100505815, MIR1914, MIR647, MIR941-1, MIR941-2, MIR941-3, MIR941-4, PDPF, PRIC285, PRPF6, PTK6, RTEL1, RTEL1-TN, RTEL1-TNFRSF6B, SAMD10, SLC2A4RG, SRMS, STMN3, TNFRSF6B, TPD52L2, UCKL1, UCKL1-AS1, ZBTB46, ZGPAT, ZNF512B,</i> | <i>ARFGAP1, BIRC7, C20orf201, CHRNA4, COL20A1, FLJ16779, KCNQ2, LINC00176, MIR3196, MIR4326, MIR941-2, MIR941-2, MIR941-2, MIR941-3, MIR941-3, MIR941-4, MIR941-4, MYT1, NKAIN4, NPBWR2, OPRL1, OPRL1, RGS19, SOX18, TCEA2,</i> |
| 23 | chrX  | rs2405942  | <i>GPR143, LOC100288814, SHROOM2, TBL1X, WWC3,</i>                                                                                                                                                                                                                                               | <i>CLCN4,</i>                                                                                                                                                                                                                   |

Regions were defined by either SNPs  $r^2 < 0.2$  or a 500kb window, using whichever boundary was the furthest. For pathway analysis we also used the genes from a 1 Mb window.



## Supplementary Table 7

*HOXB13* hits (rs138213197, rs11650494)

Analysis performed in subset of CAPS comprising 1927 cases and 987 controls. Markers explored under a dominant genetic model in logistic regression analysis.

**Correlation:**  $r^2=0.001$ ,  $D'=0.056$

### Association:

| Marker      | Alleles | MA | MAF   | Univariate          |         | Mutually adjusted   |         |
|-------------|---------|----|-------|---------------------|---------|---------------------|---------|
|             |         |    |       | OR (95% CI)         | P value | OR (95% CI)         | P value |
| rs138213197 | C/T     | C  | 0.017 | 2.77 (1.59 to 4.84) | 0.00034 | 2.75 (1.57 to 4.80) | 0.00038 |
| rs11650494  | G/A     | A  | 0.062 | 1.28 (1.00 to 1.64) | 0.046   | 1.28 (1.00 to 1.65) | 0.048   |

MA minor allele

MAF minor allele frequency

The University of Michigan recently completed a GWAS for 931 men of European descent diagnosed with PrCa prior to age 56 years. Twenty-three of the affected men were determined to carry the *HOXB13* G84E mutation, all on the same founder haplotype; rs11650494 was not directly genotyped. Genotype imputation was performed, using MACH, resulting in predicted high-quality genotype scores at rs11650494 ( $r^2=0.97$ ) and a proxy genotyped SNP rs7216993 ( $r^2 = 0.83$  with rs11650494 based on 1000 Genomes) was identified. Twenty-two of the 23 G84E carriers were homozygous for the common *non-risk* allele at rs11950494 (unambiguously predicted based on imputation) and rs7216993 (Lange and Cooney; *personal communication*). These findings indicate that the association of rs11650494 with PrCa is not due to confounding with *HOXB13* G84E and that multiple PrCa susceptibility variants in the *HOXB13* region may exist, conferring different risks.

**Supplementary Table 8:**

Relative Risk Estimation Using 68 known PrCa susceptibility loci\*

| Percentiles | RR                  | RR               |
|-------------|---------------------|------------------|
| < 1%        | 1 (baseline)        | 0.16 (.11-.24)   |
| 1-10%       | 2.15 (1.43-3.23)    | 0.35 (.32-.39)   |
| 10-25%      | 3.31 (2.22-4.94)    | 0.54 (.50-.58)   |
| 25-75%      | 6.10 (4.11-9.07)    | 1 (baseline)     |
| 75-90%      | 10.35 (6.95-15.42)  | 1.70 (1.60-1.80) |
| 90-99%      | 16.14 (10.83-24.07) | 2.64 (2.48-2.82) |
| >= 99%      | 26.88 (17.54-41.20) | 4.40 (3.74-5.19) |

\* PRACTICAL European samples in iCOGS were used for risk estimation and for 9 out of 68 SNPs, a proxy with  $r^2$  greater than 0.76 was used.

### Supplementary Figure 1

This shows the Quantile-Quantile (Q-Q) plot for SNPs selected from combined GWAS excluding fine mapping and candidate SNPs

QQ plot

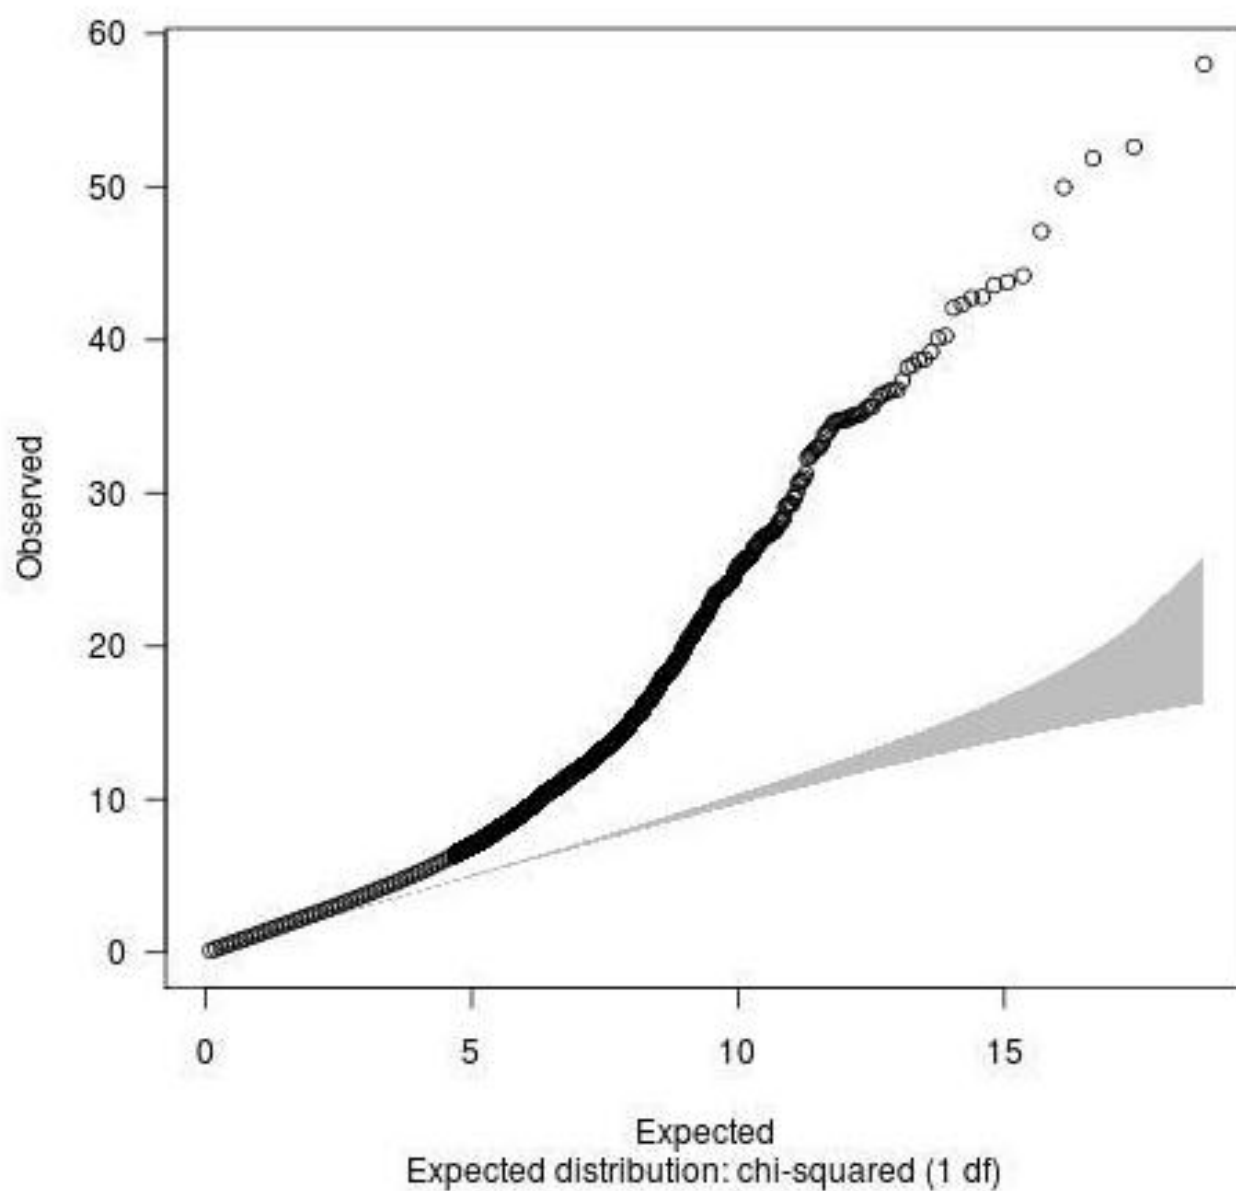

**Supplementary Figure 2 - Forest plots showing the point estimates and 95% CI in each study for each of the 23 new loci. The size of the square reflects the size of the study.**

rs1218582, P-het=0.48

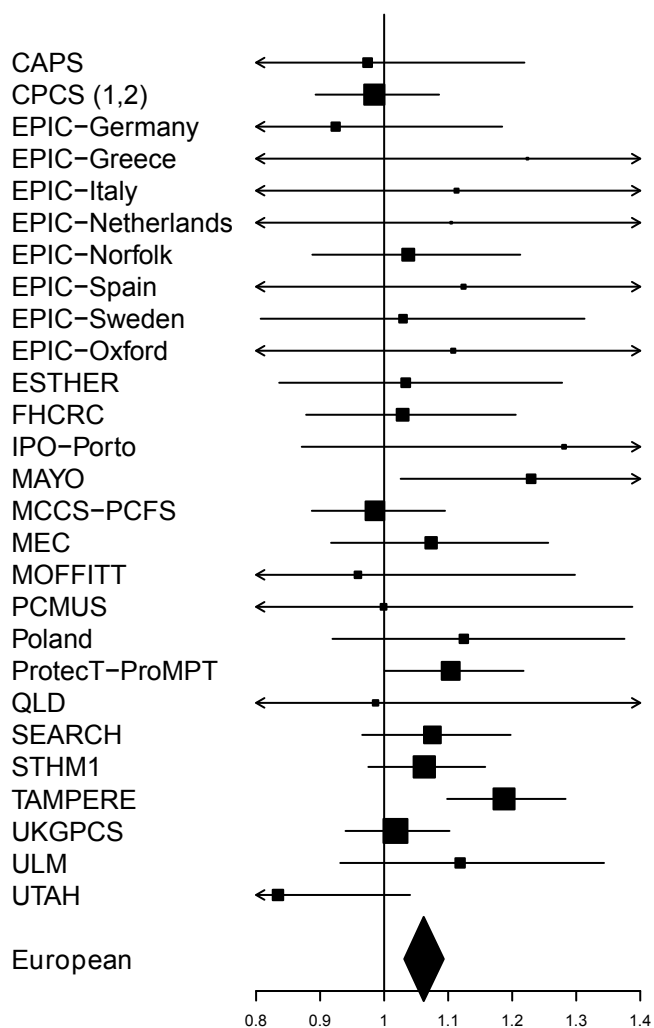

rs4245739, P-het=0.55

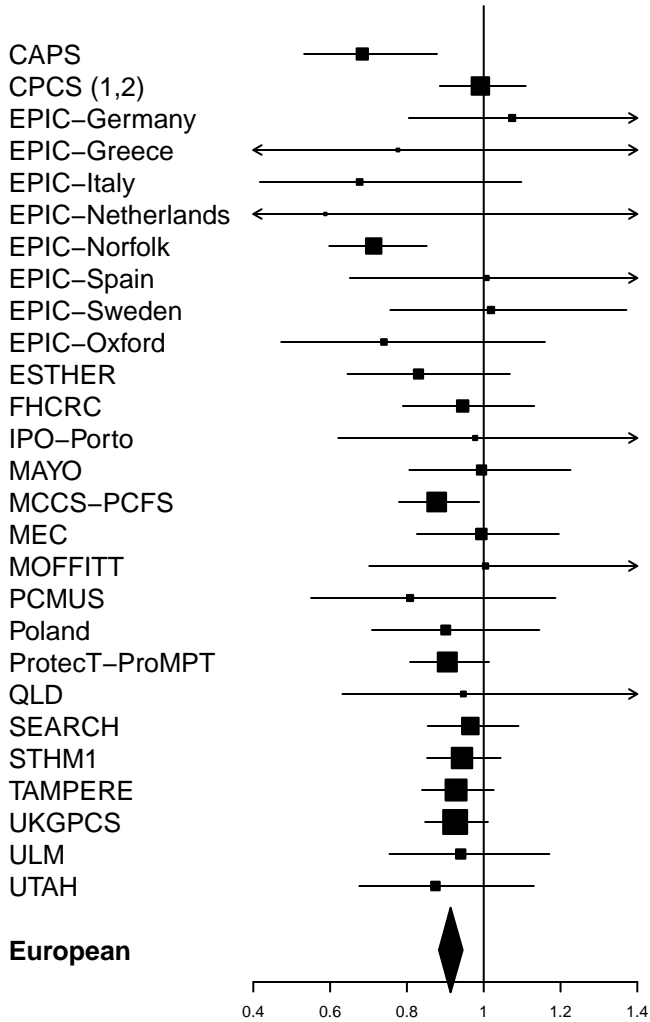

rs11902236, P-het=0.52

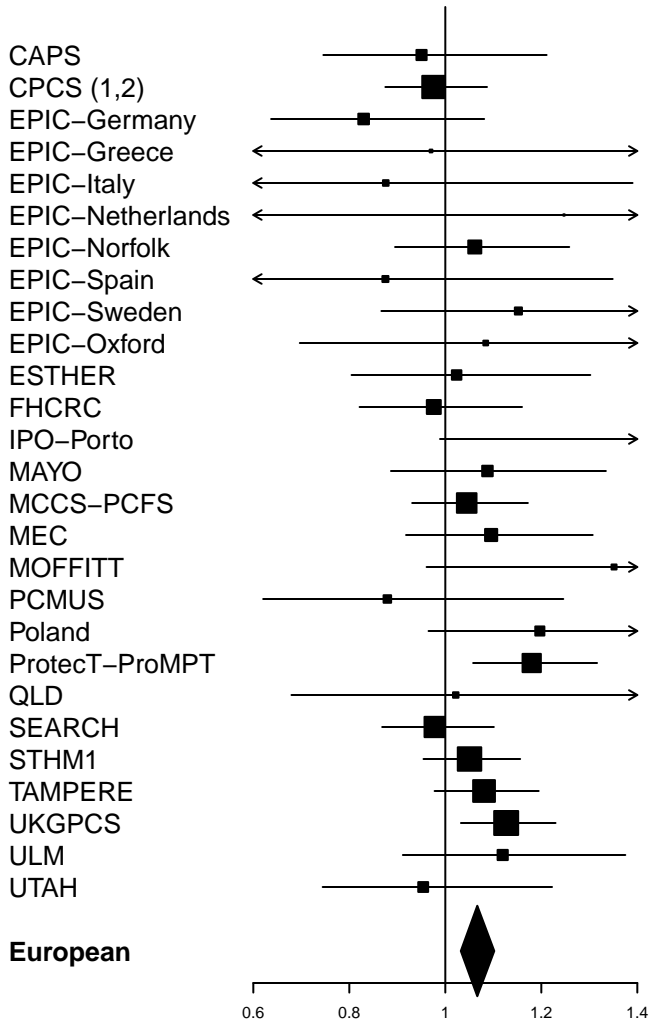

rs3771570, P-het=0.12

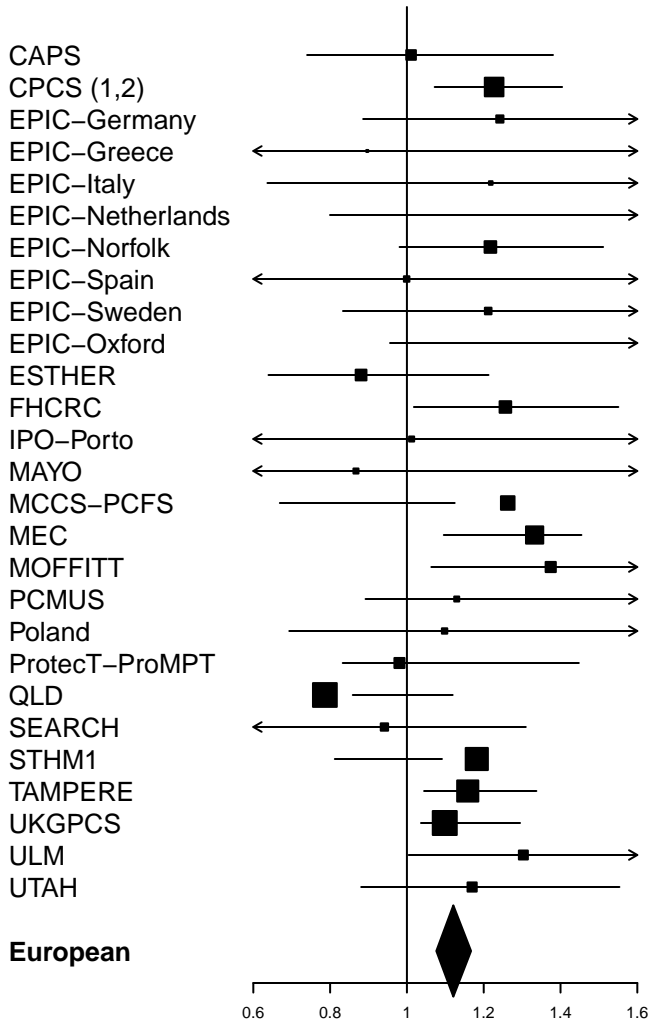

rs7611694, P-het=0.87

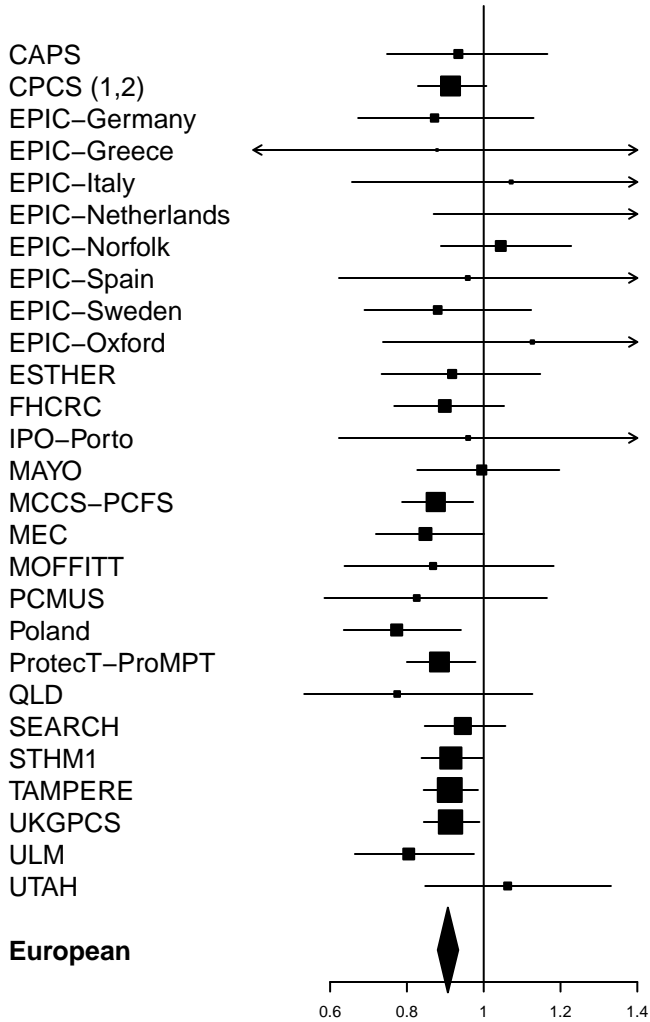



rs1894292, P-het=0.29

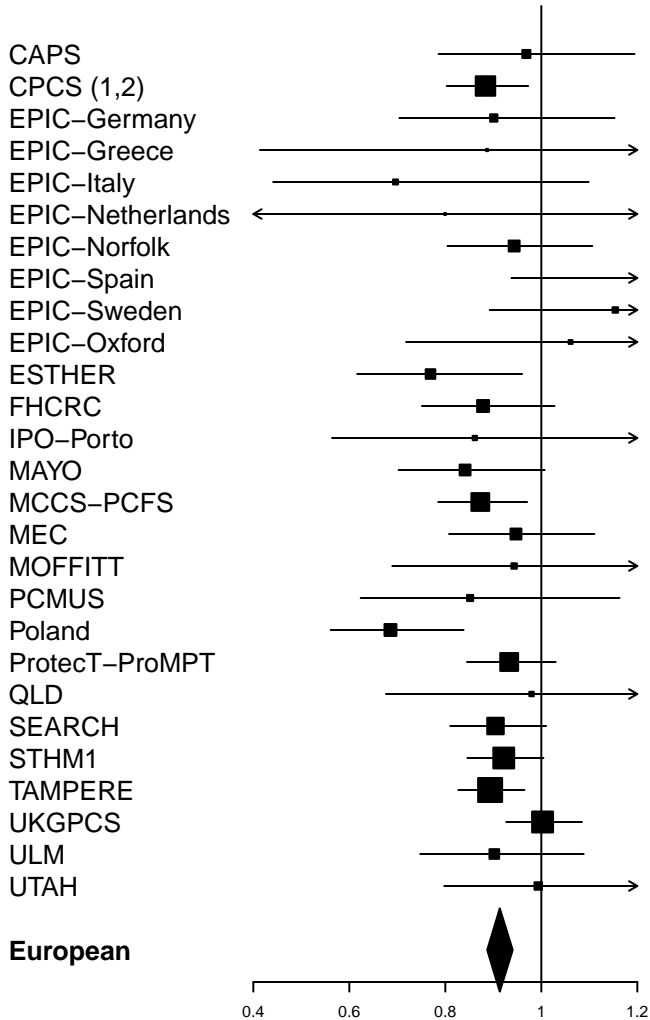

rs6869841, P-het=0.29

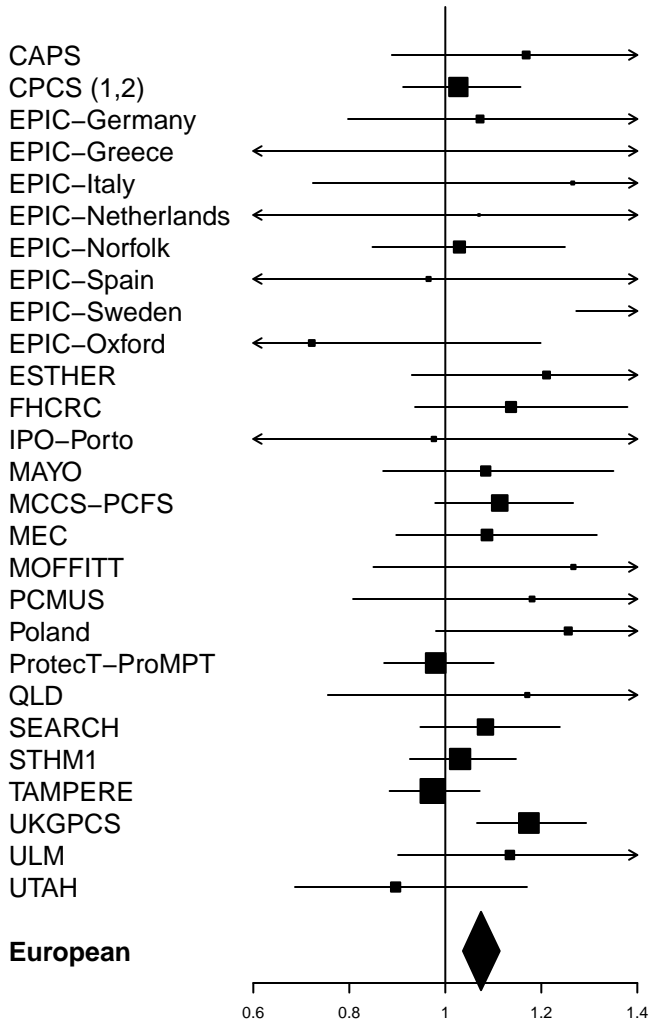

rs3096702, P-het=0.04

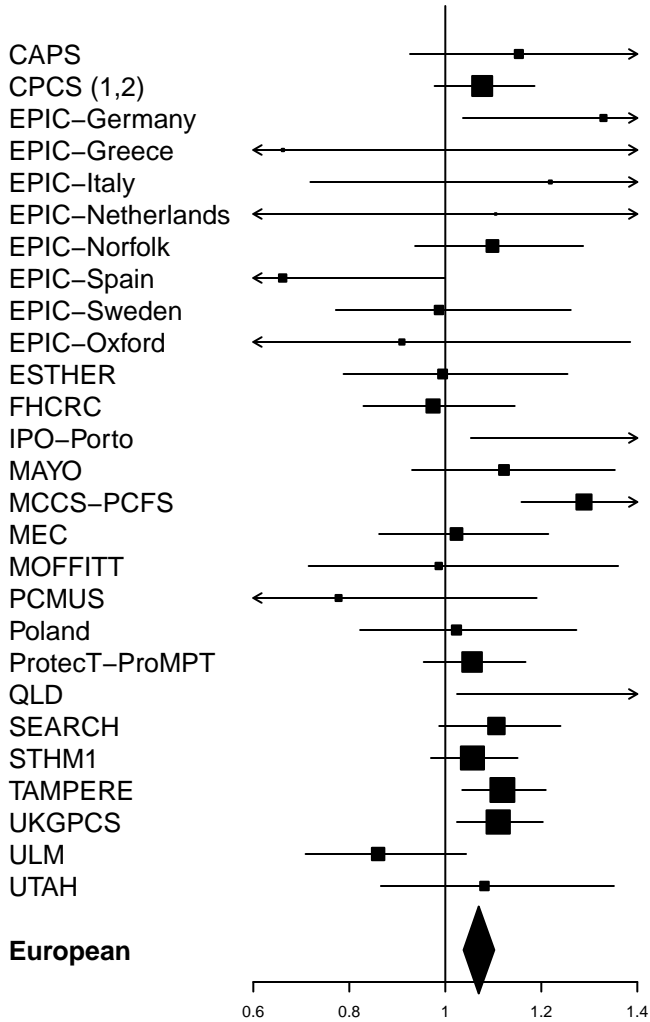

rs2273669, P-het=0.94

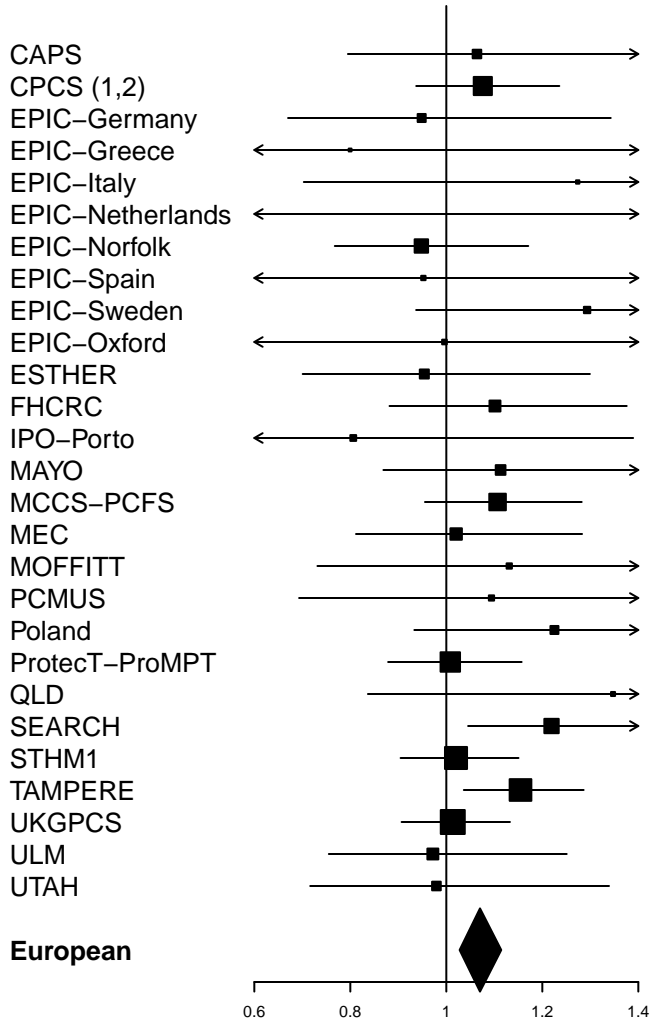

rs1933488, P-het=0.12

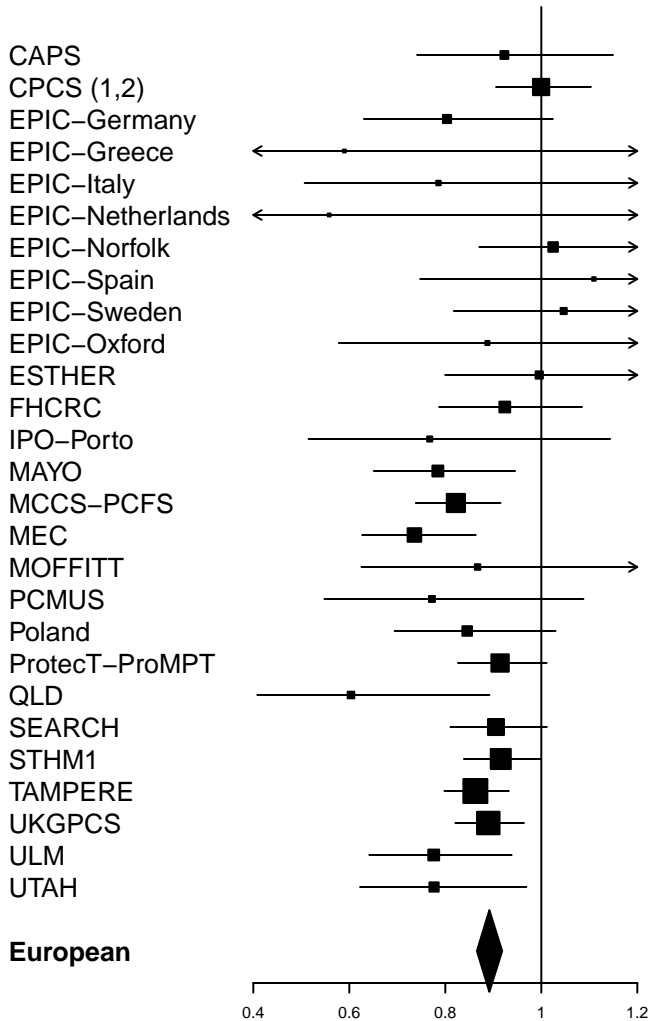

rs12155172, P-het=0.14

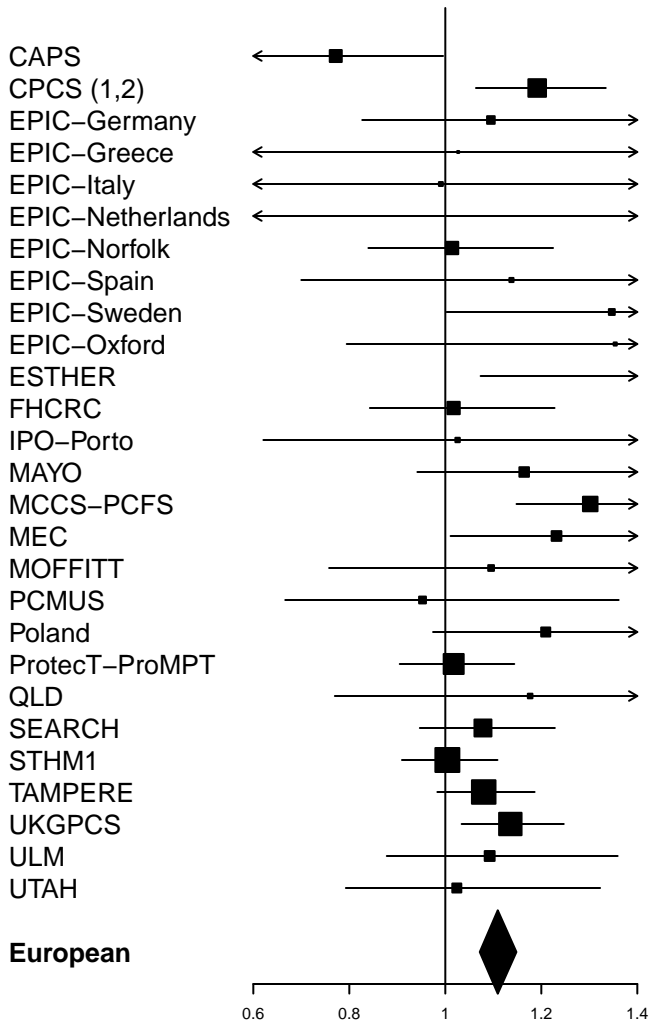

rs11135910, P-het=0.06

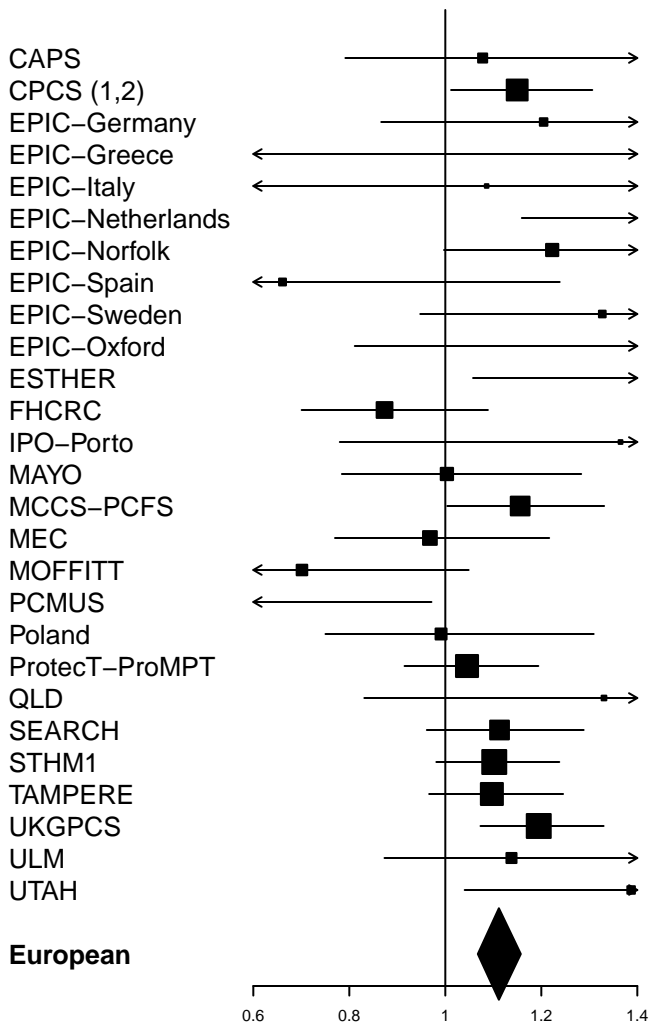

rs3850699, P-het=0.99

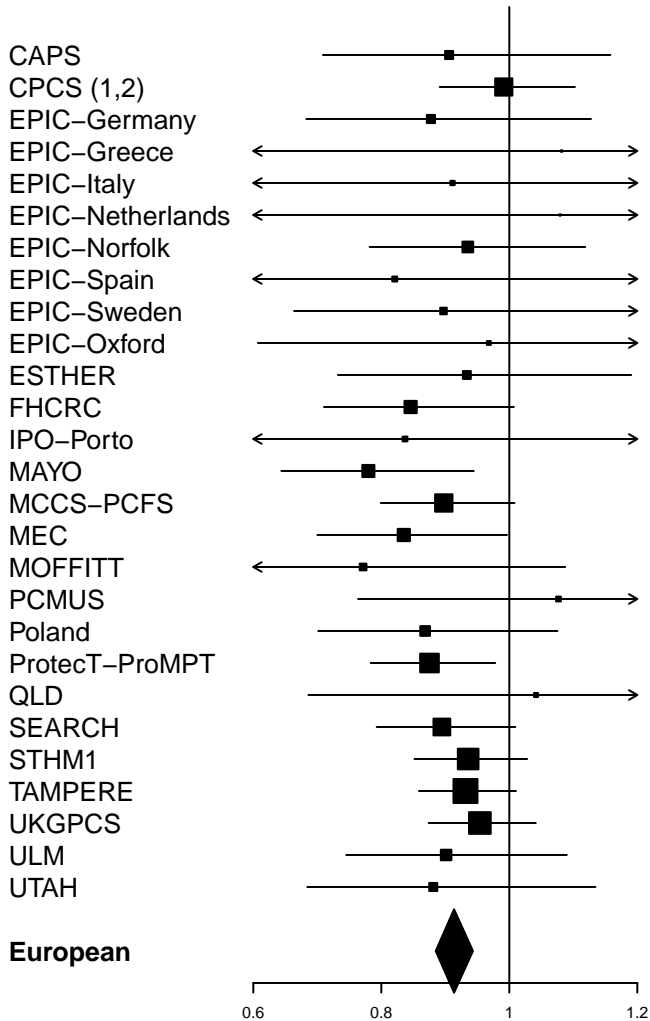



rs11568818, P-het=0.02

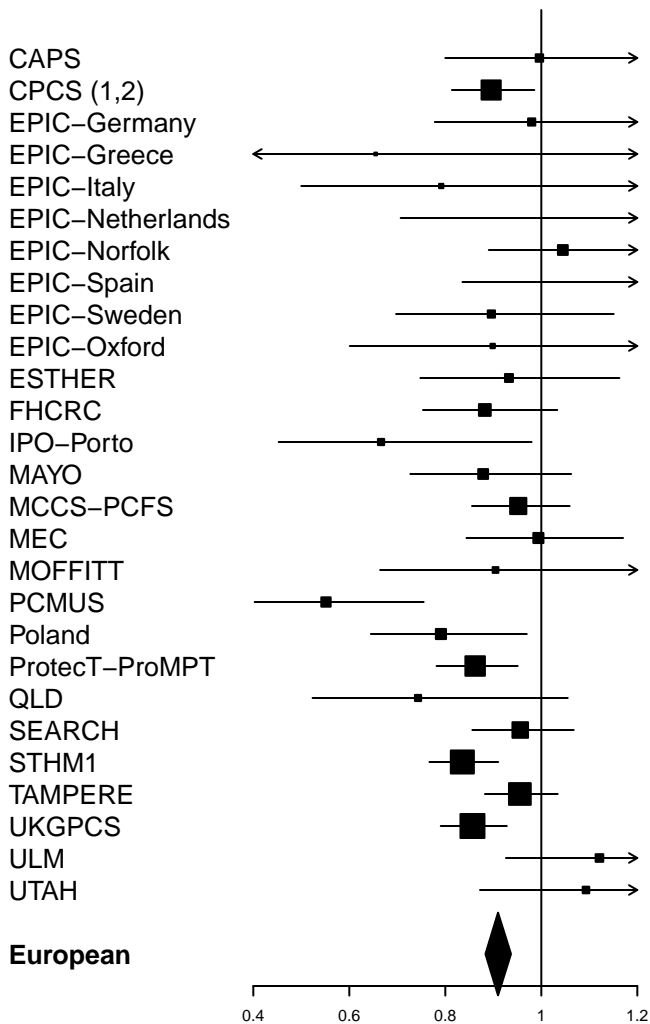

rs1270884, P-het=0.39

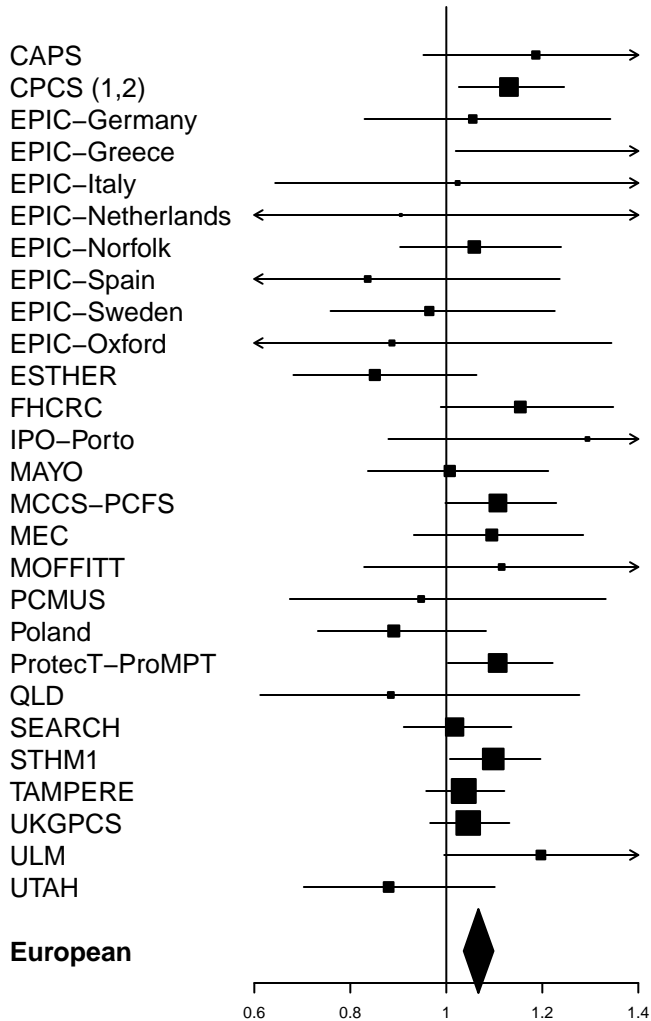

# rs8008270, P-het=0.33

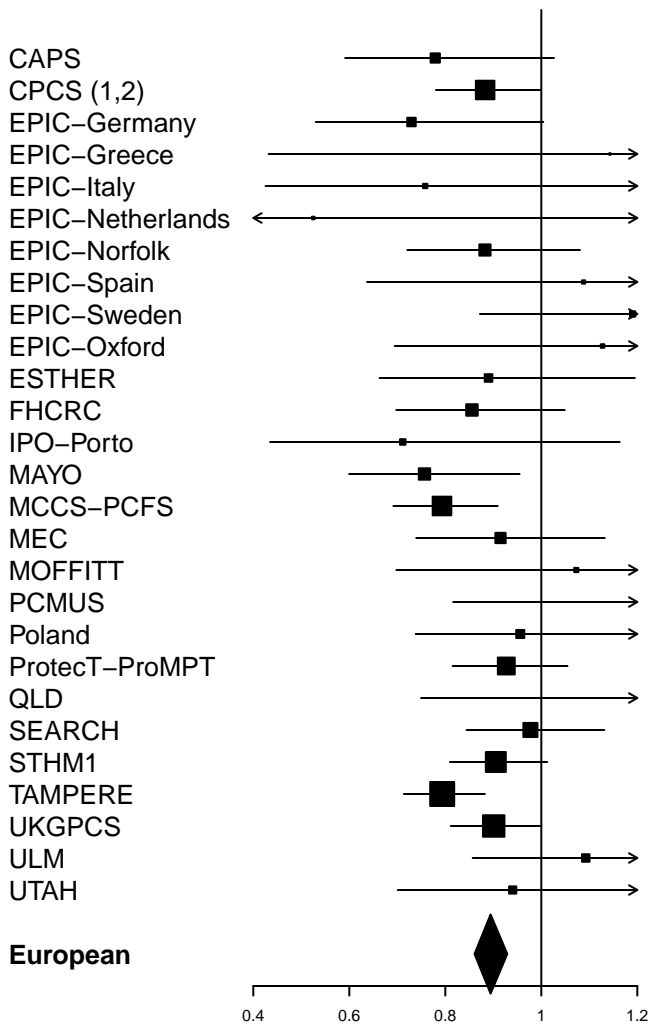

# rs7141529, P-het=0.81

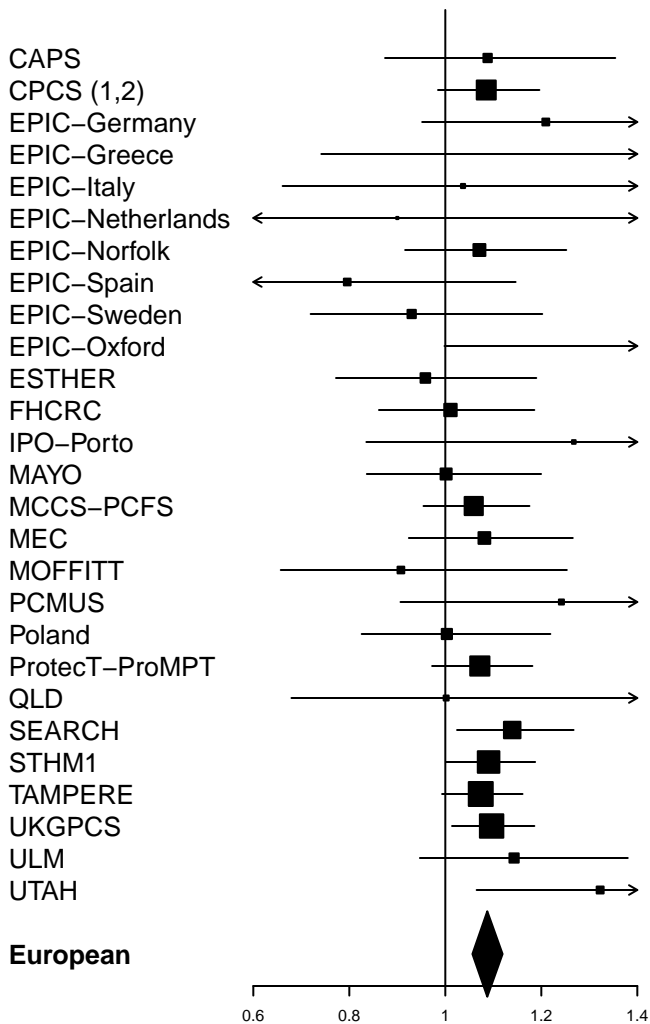

rs684232, P-het=0.99

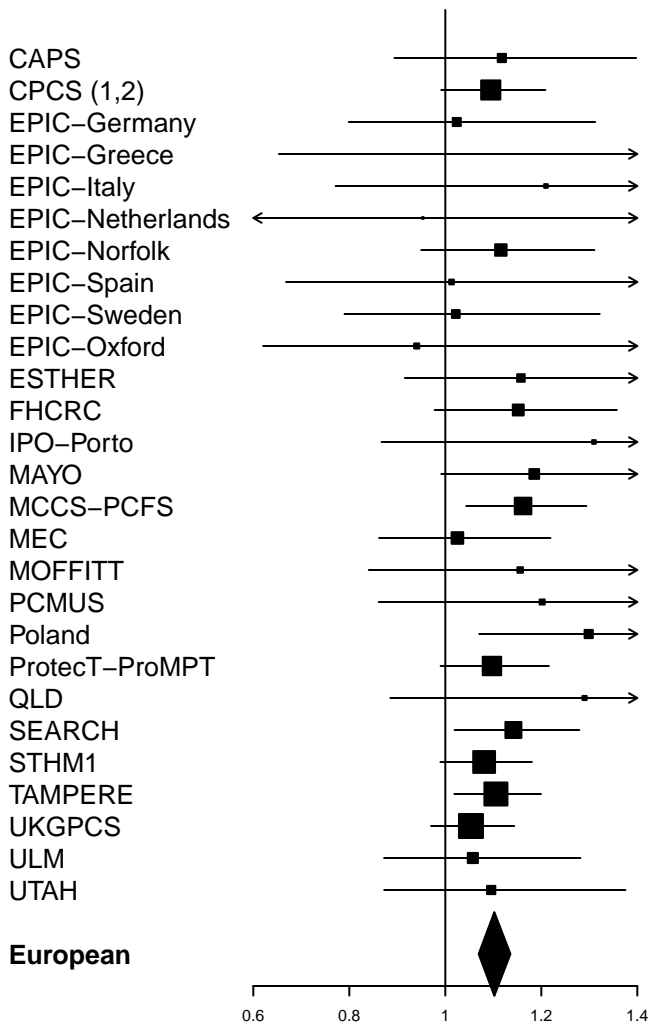

rs11650494, P-het=0.02

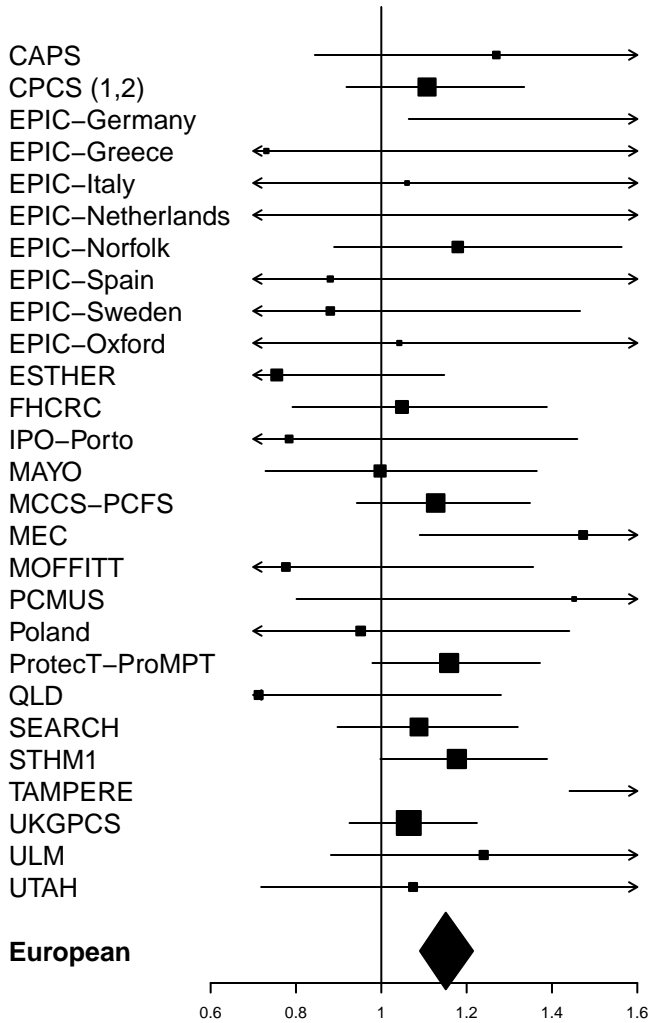

# rs7241993, P-het=0.01

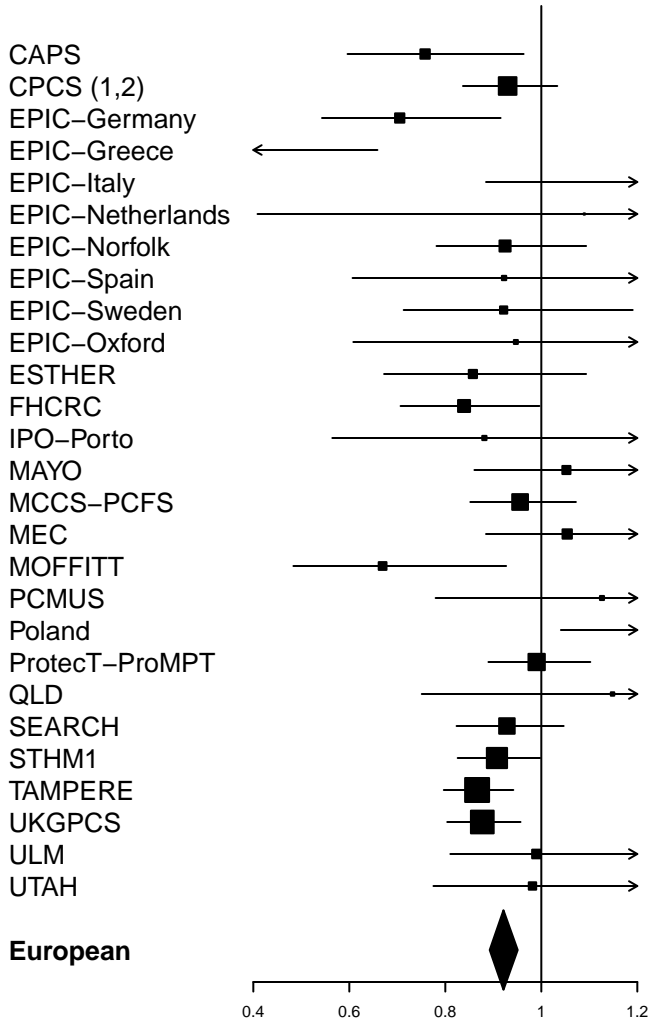

rs2427345, P-het=0.14

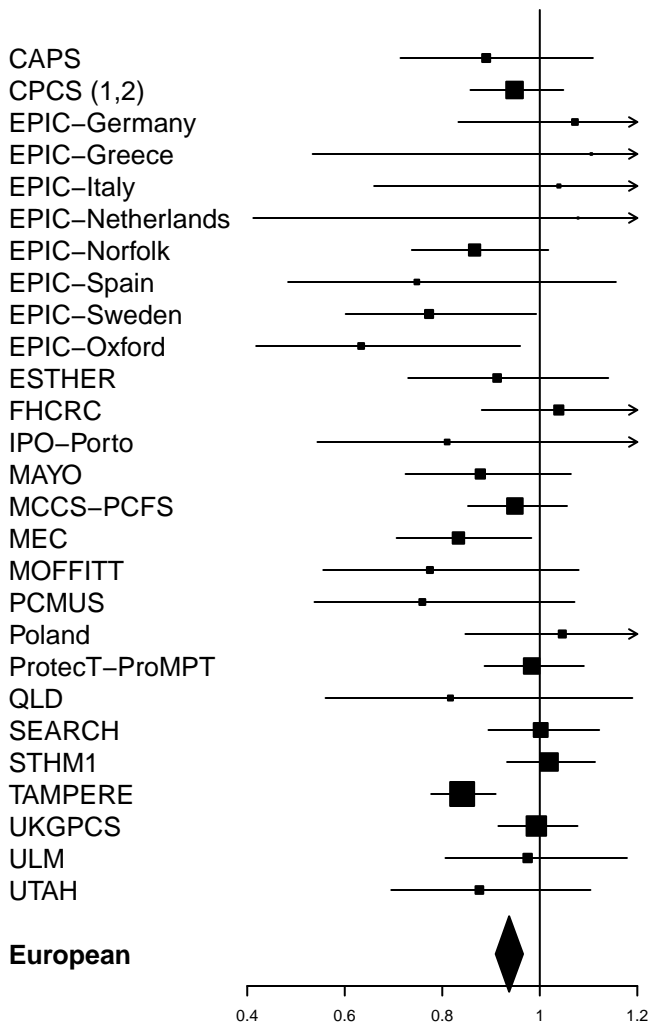



rs6062509, P-het=0.25

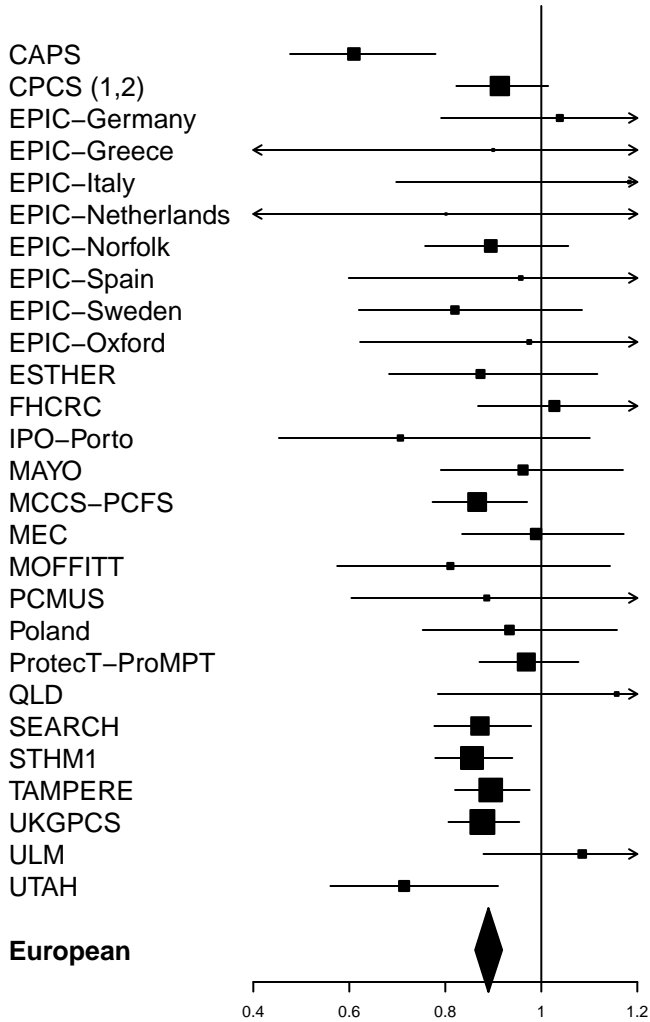

# rs2405942, P-het=0.91

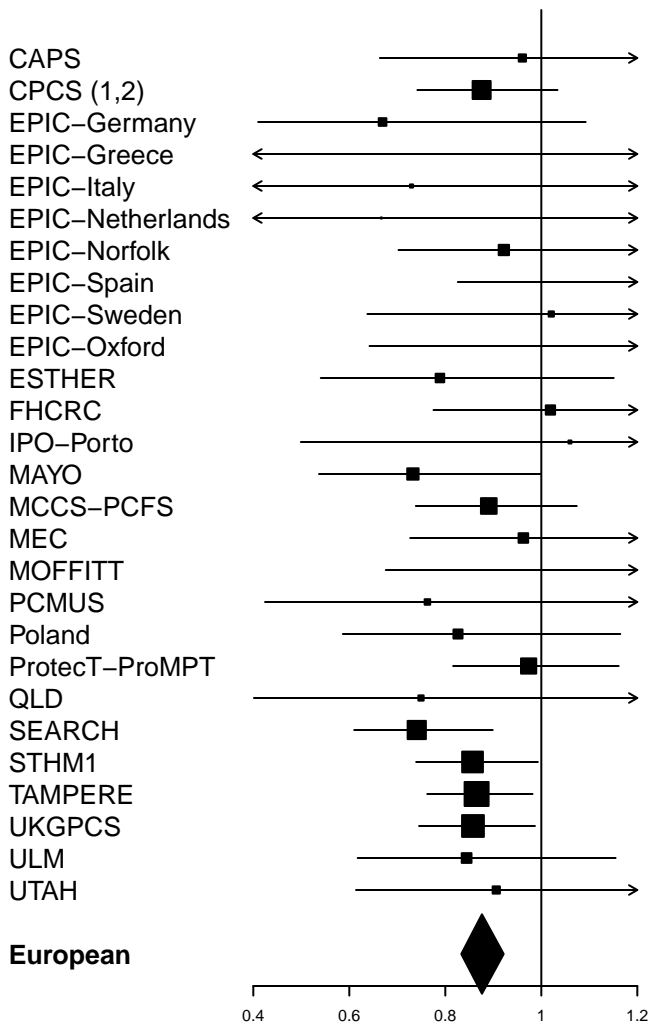

### **Supplementary Figure 3 (19 SNAP plots)**

Regional plots of the 19 associated SNPs detailed in Table 1 excluding those shown in Figure 3. Plots show the genomic regions associated with PrCa and  $-\log_{10}$  association  $P$  values of SNPs. Also shown are the SNP build 36/hg18 coordinates in kilobases, recombination rates and genes in the region. The intensity of red shading indicates the strength of LD ( $r^2$ ) with the index SNP. Plots drawn using locus zoom command line options (University of Michigan)

<http://csg.sph.umich.edu/locuszoom/>

# chr1:153100807 rs1218582

Our SNPs

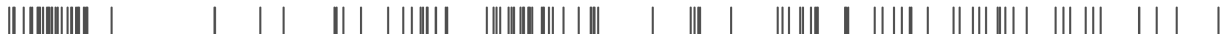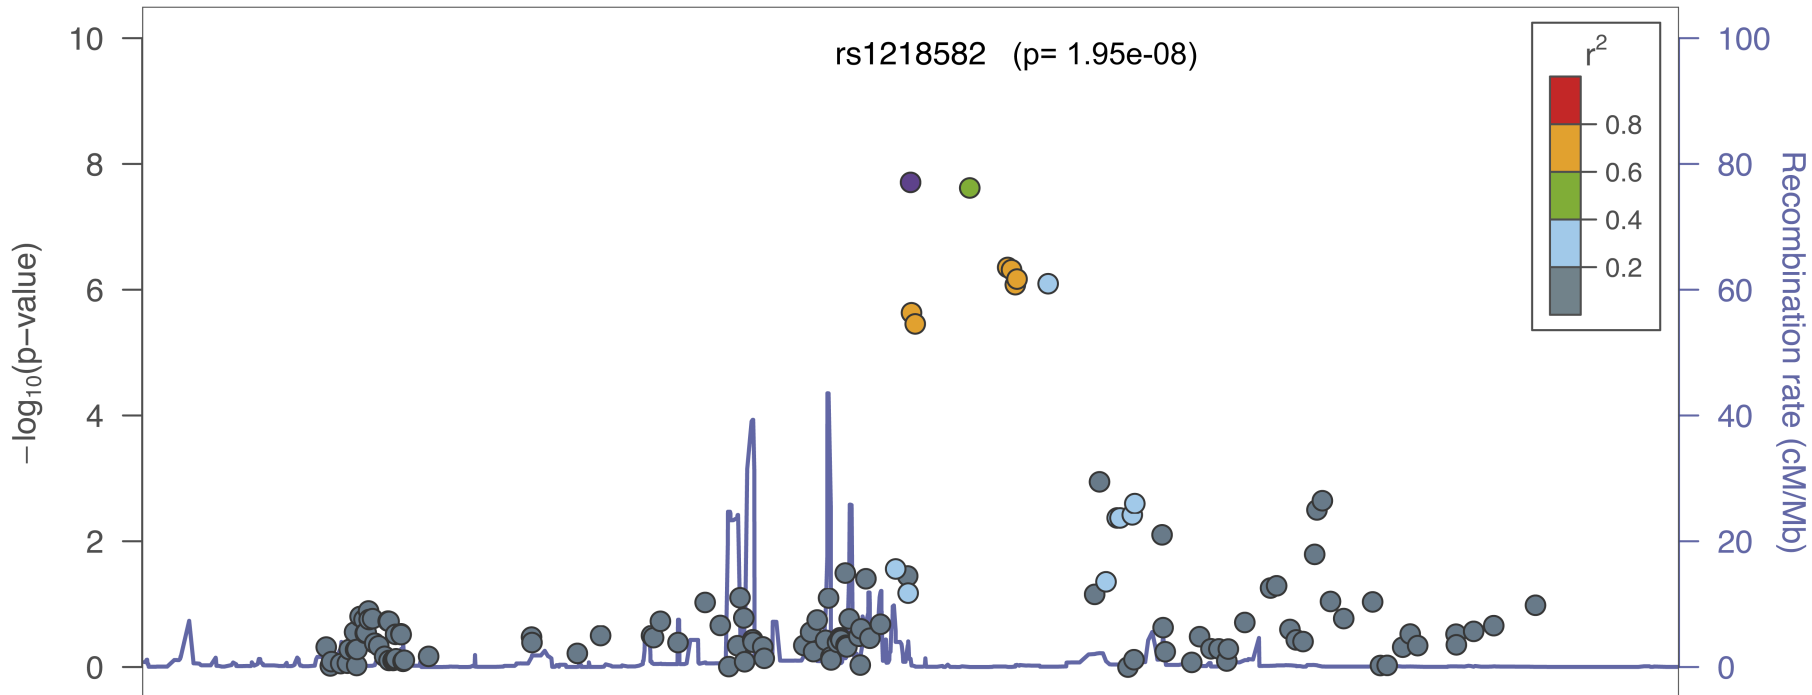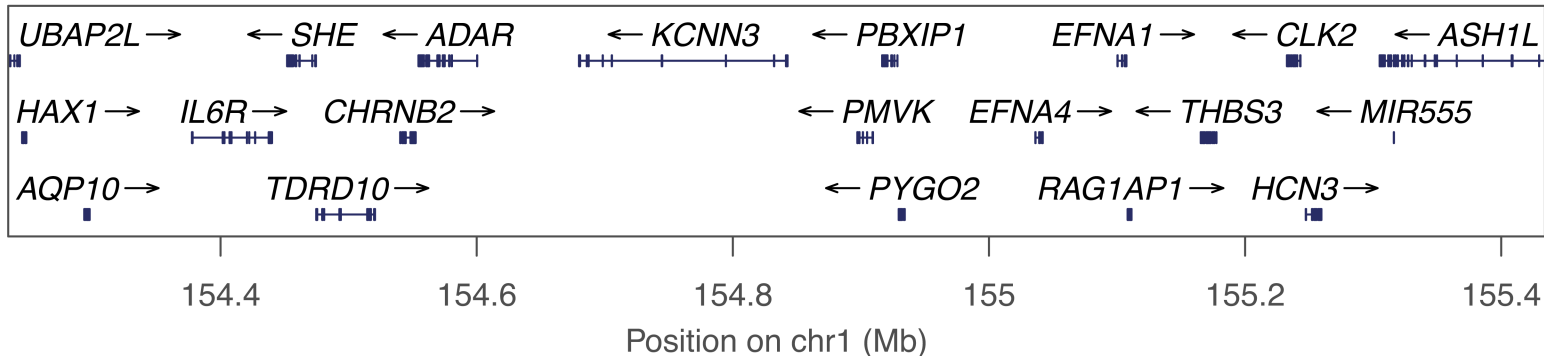

# chr2:10035319 rs11902236

Our SNPs

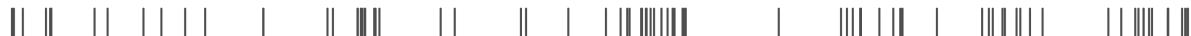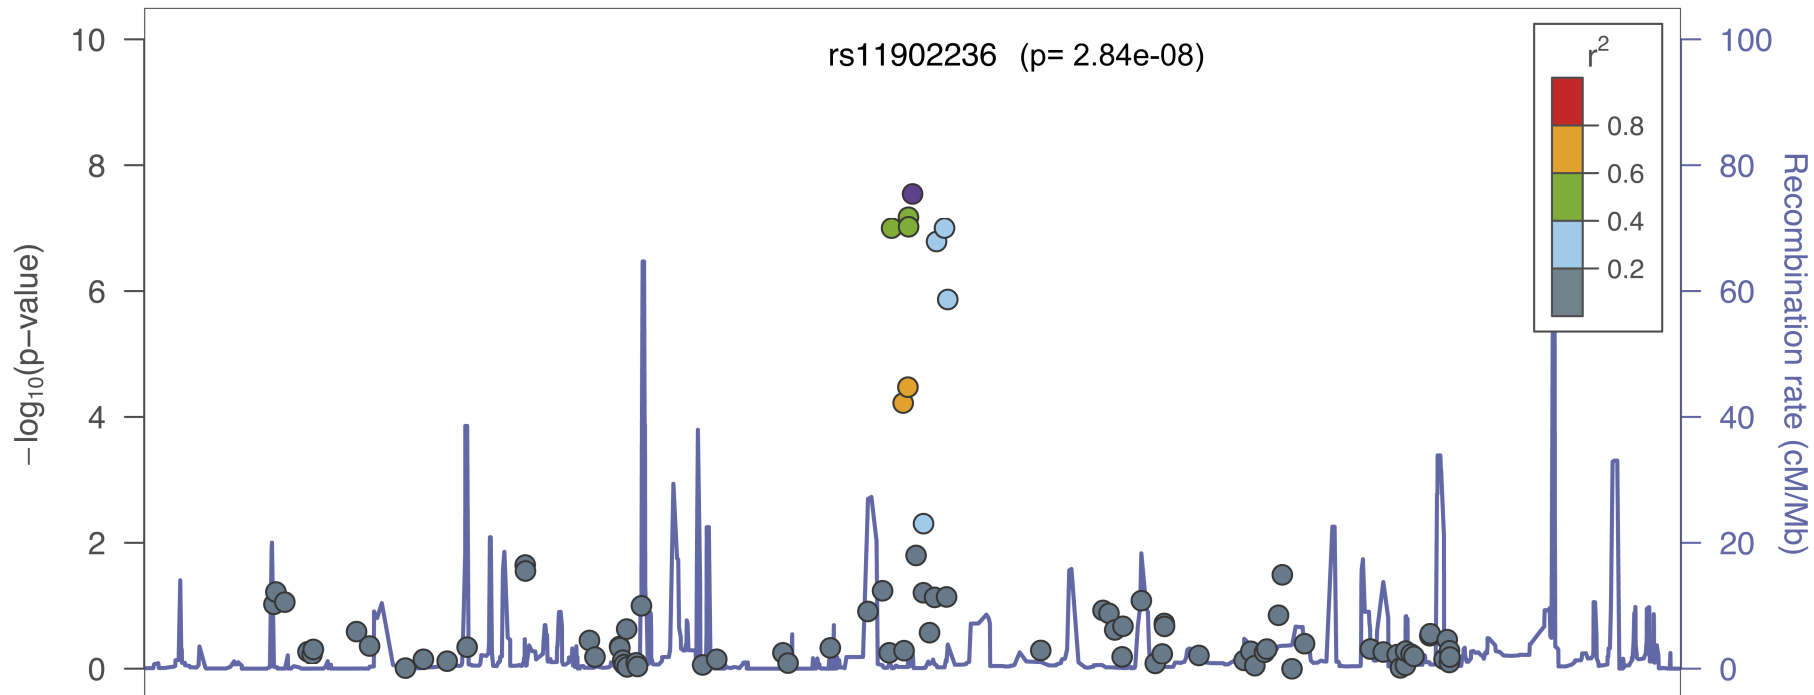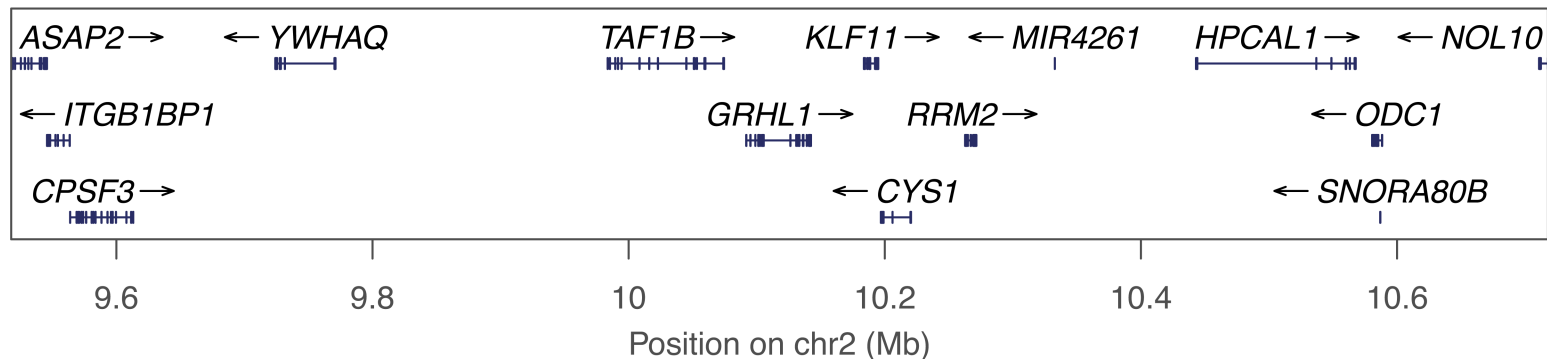

# chr2:242031537 rs3771570

Our SNPs

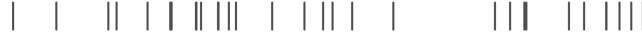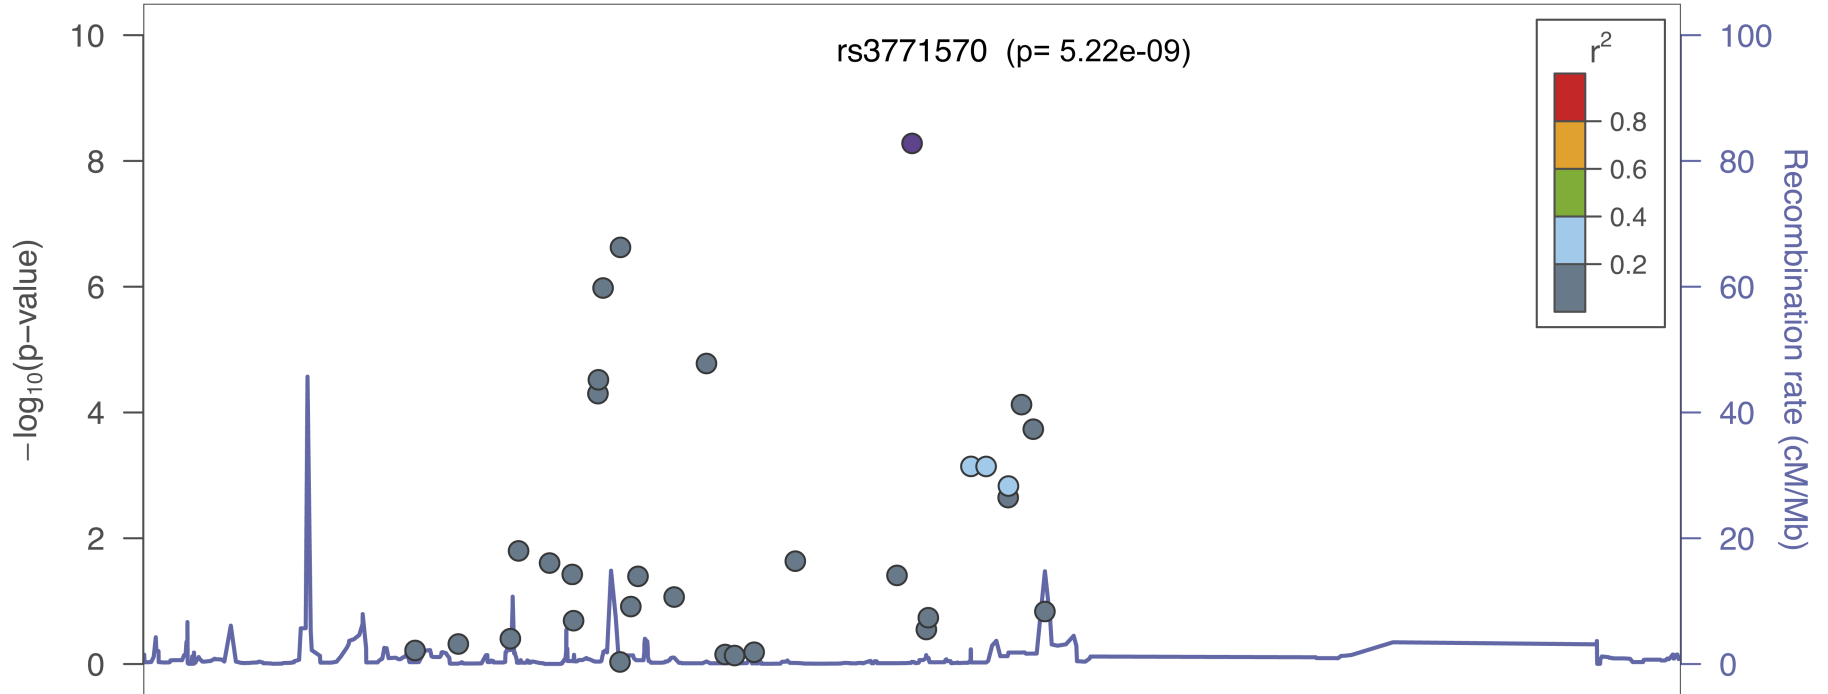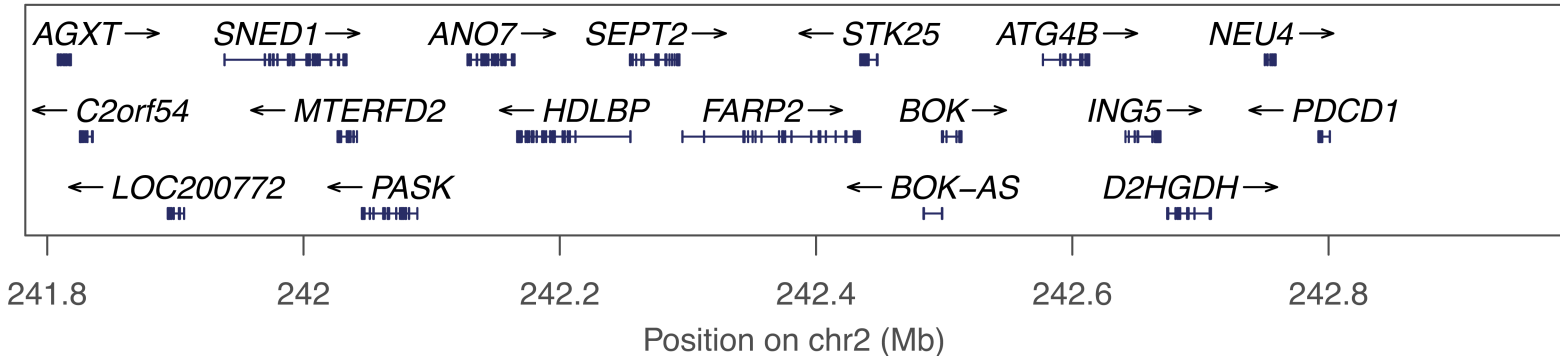

# chr3:114758314 rs7611694

Our SNPs

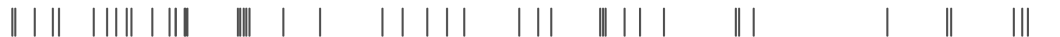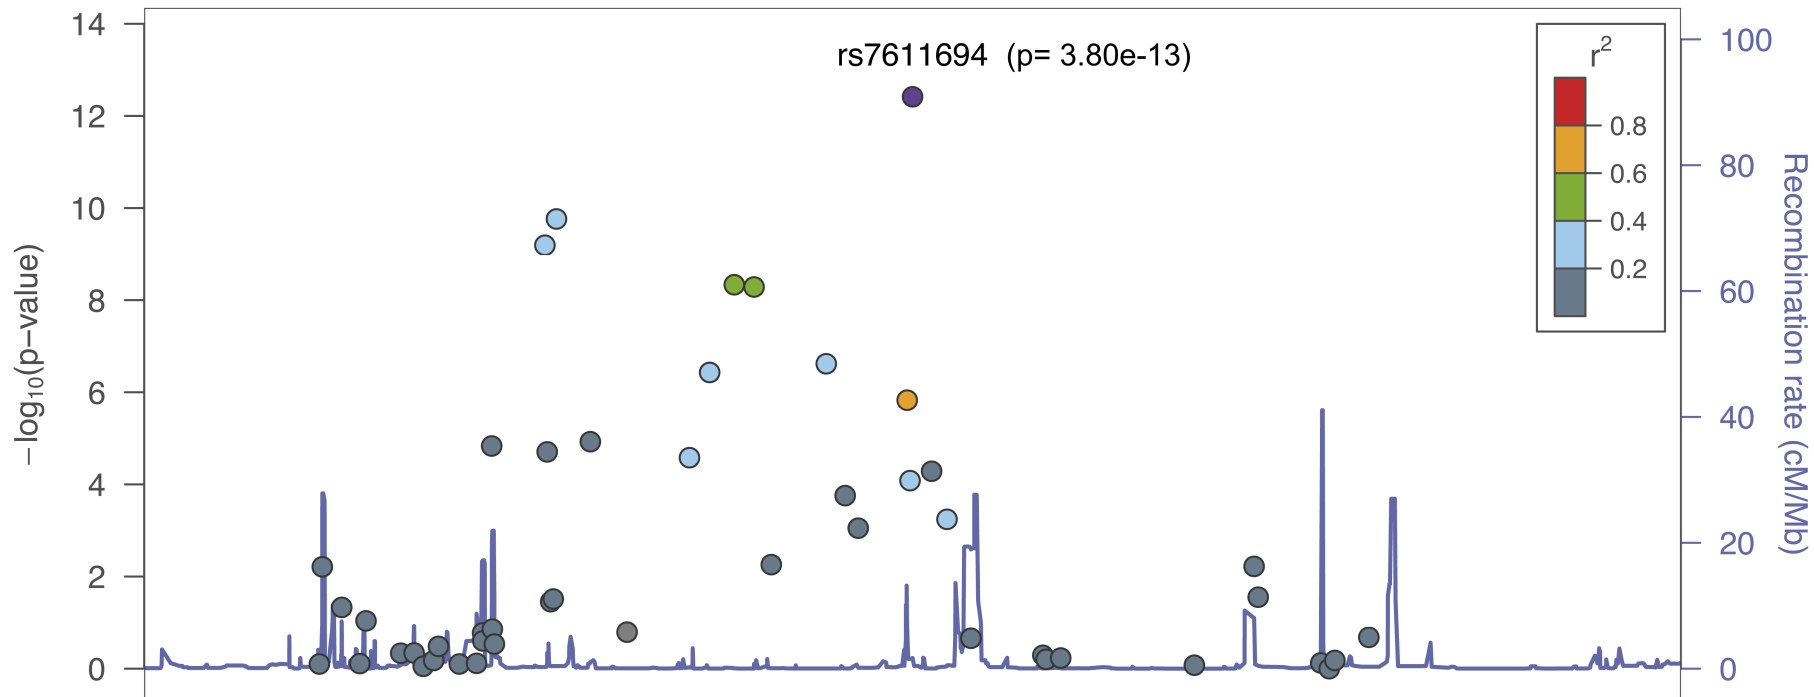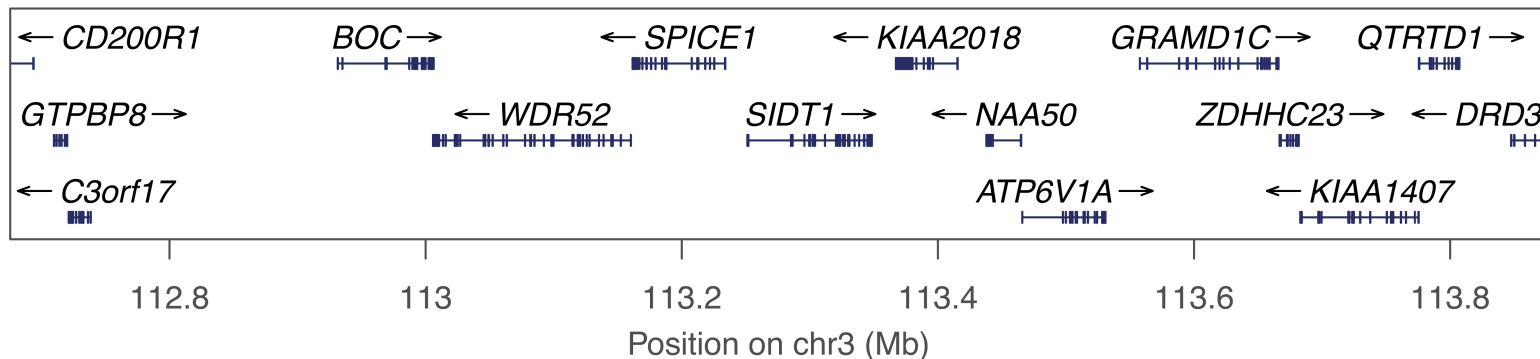

# chr4:74568022 rs1894292

Our SNPs

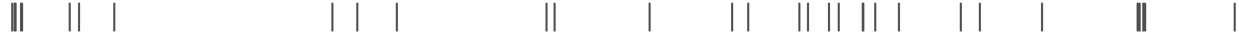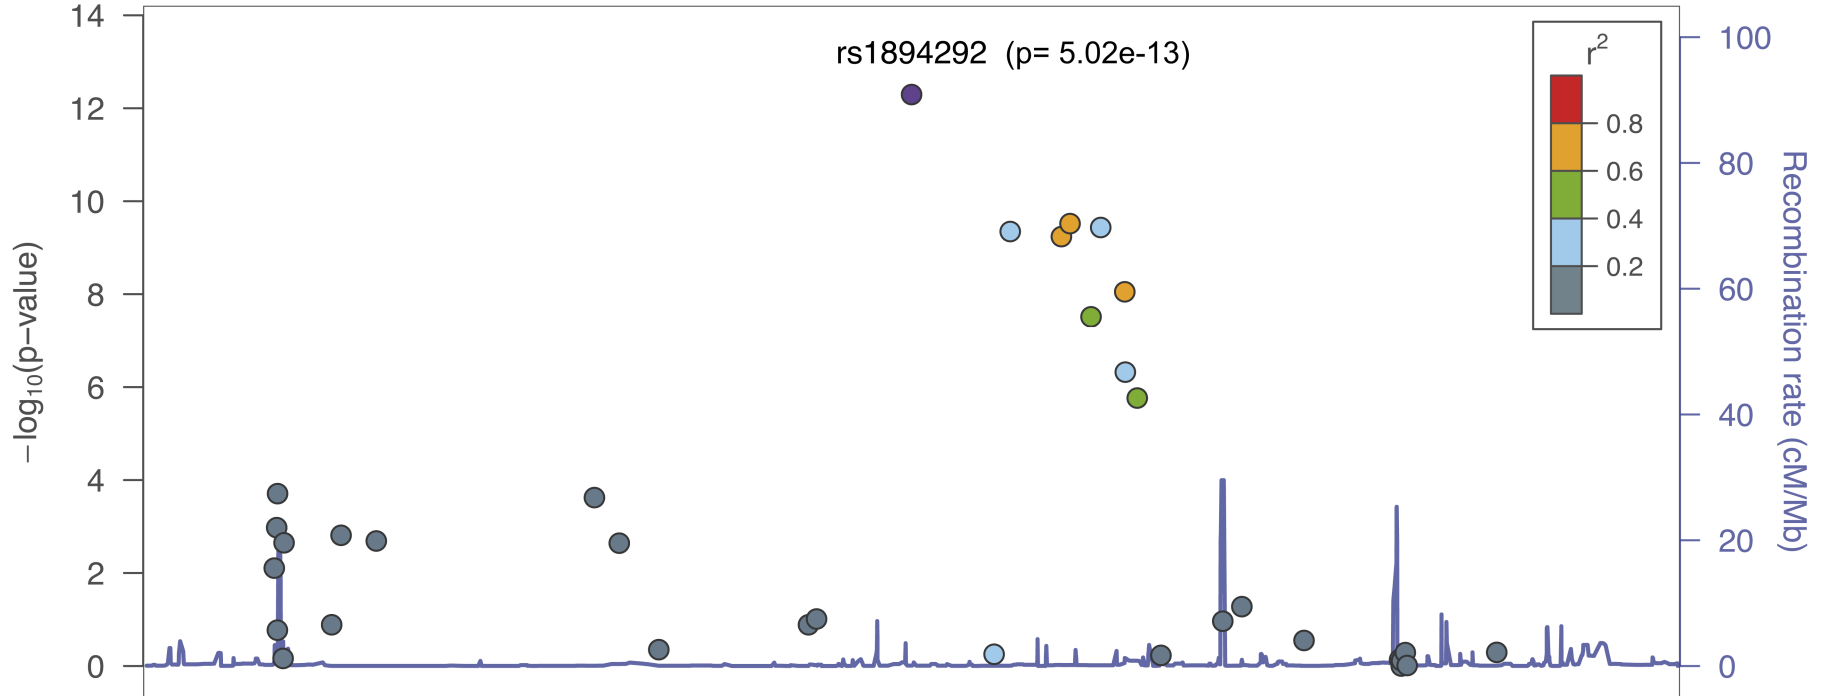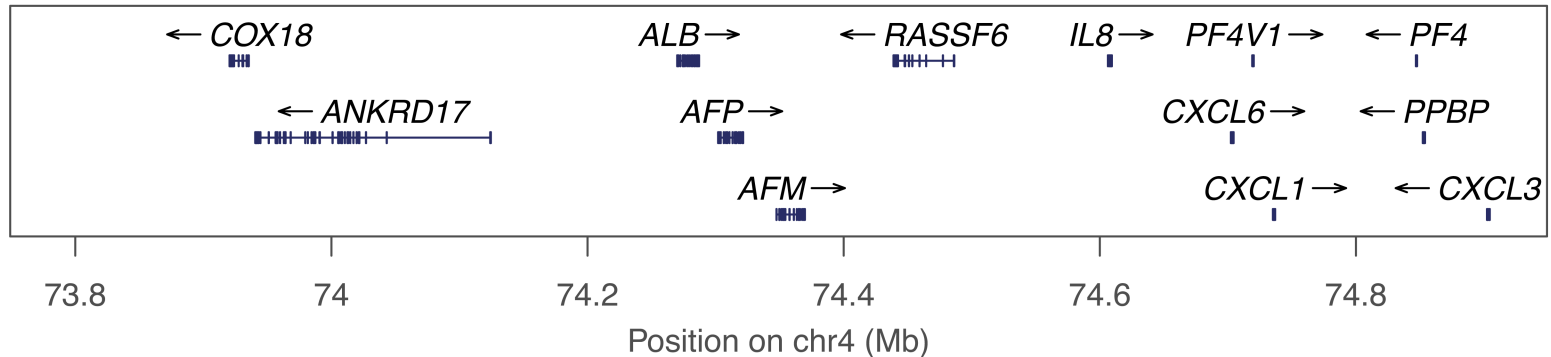



# chr5:172872032 rs6869841

Our SNPs

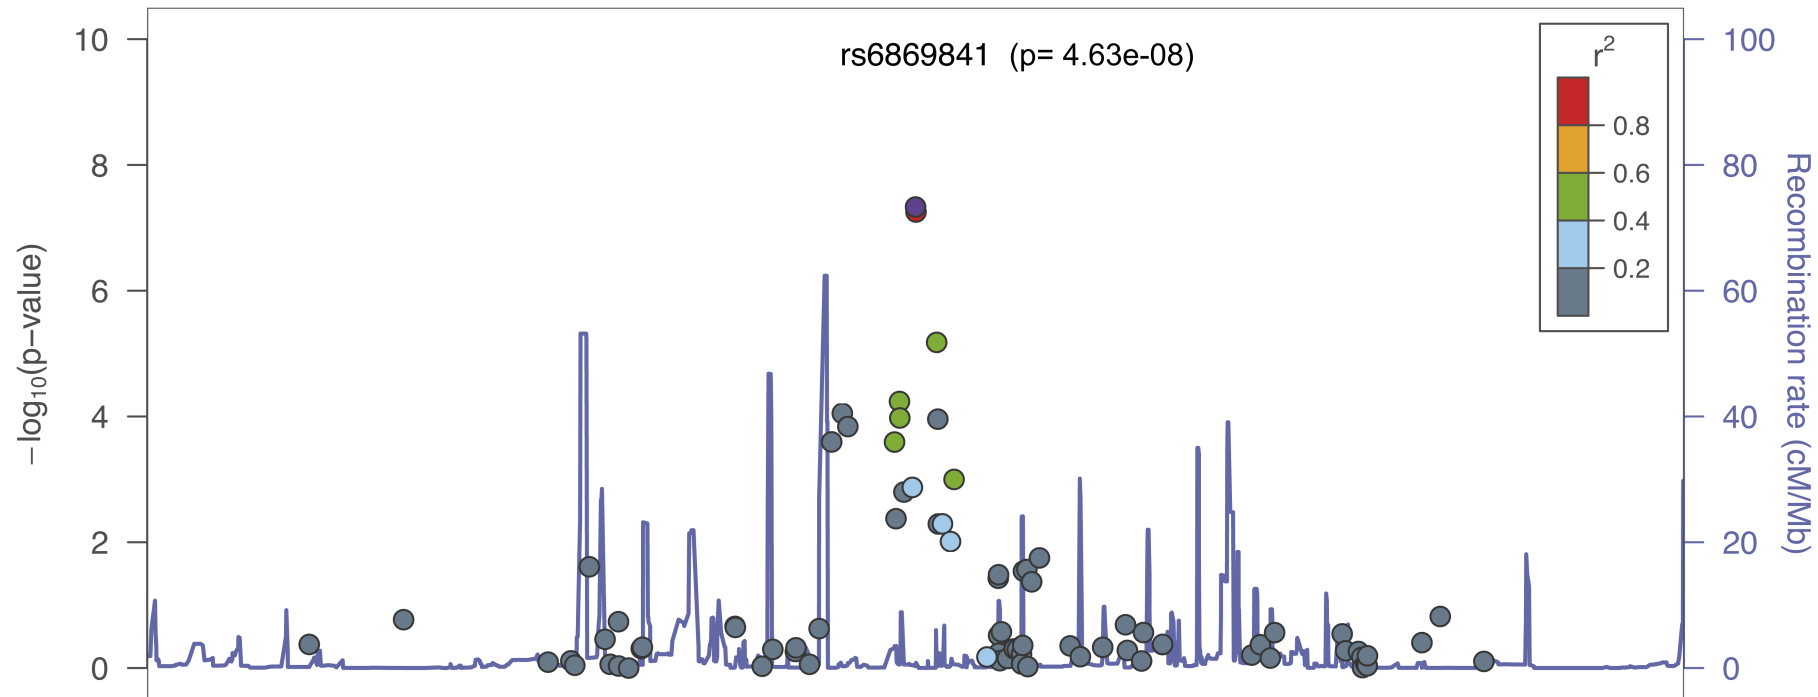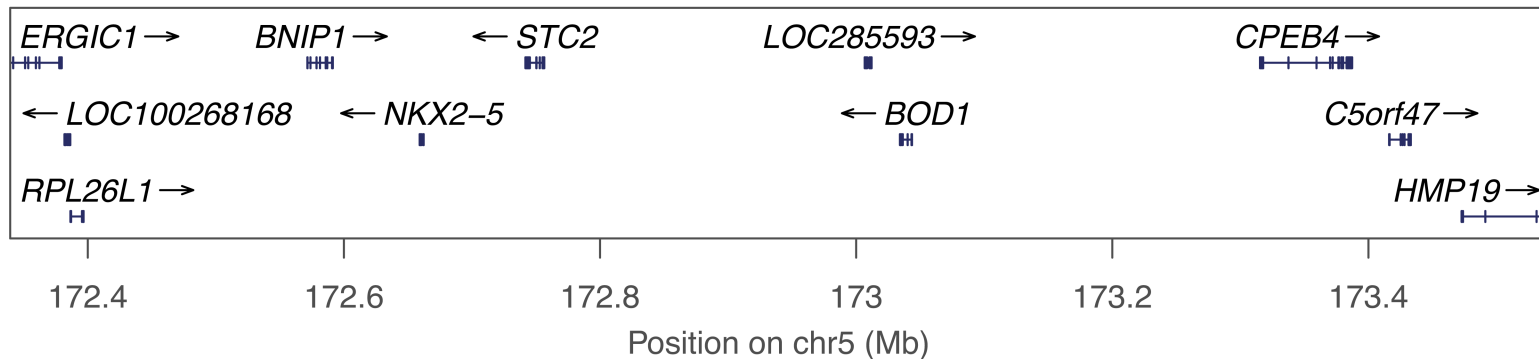

# chr6:32300309 rs3096702

Our SNPs

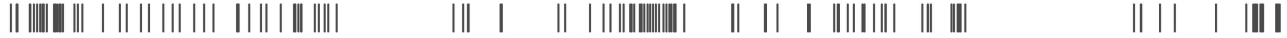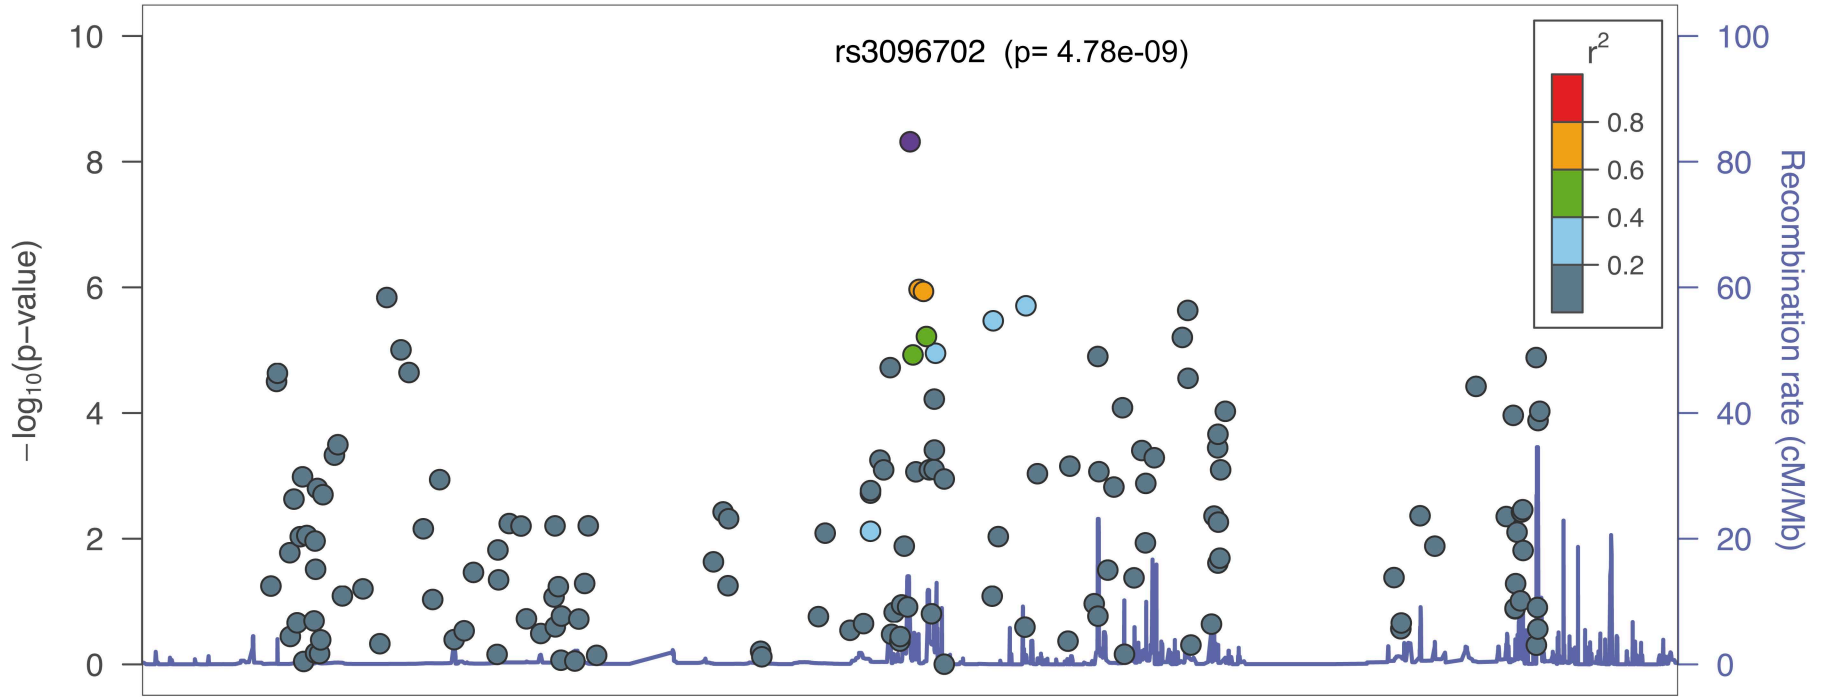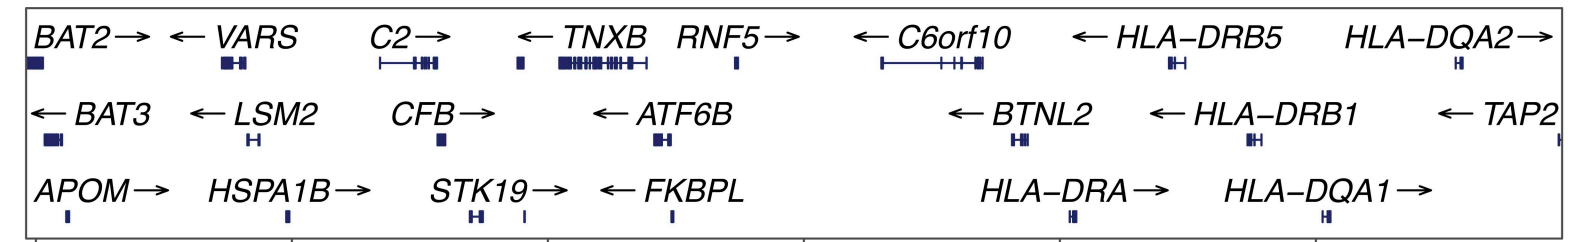

31.6 31.8 32 32.2 32.4 32.6

Position on chr6 (Mb)



# chr6:153482772 rs1933488

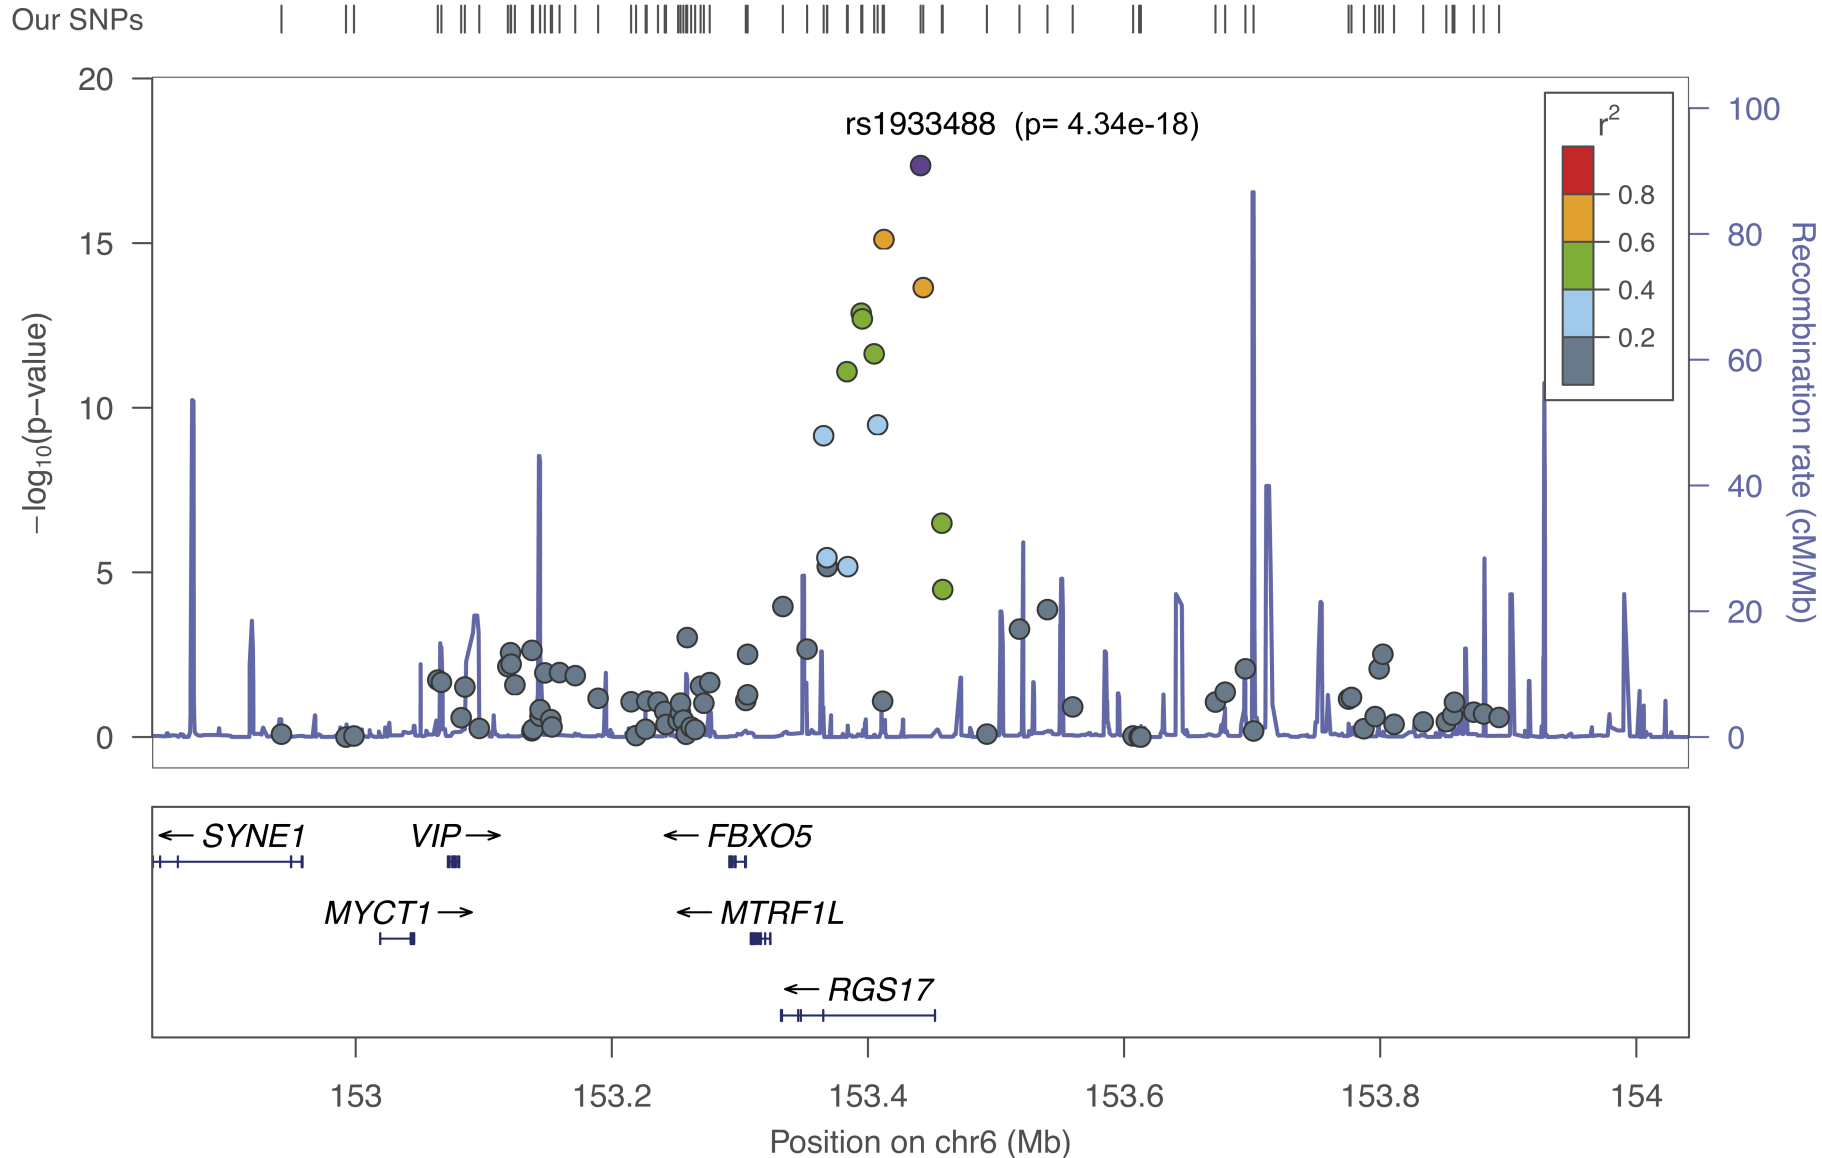

# chr7:20961016 rs12155172

Plotted SNPs

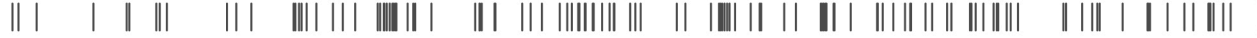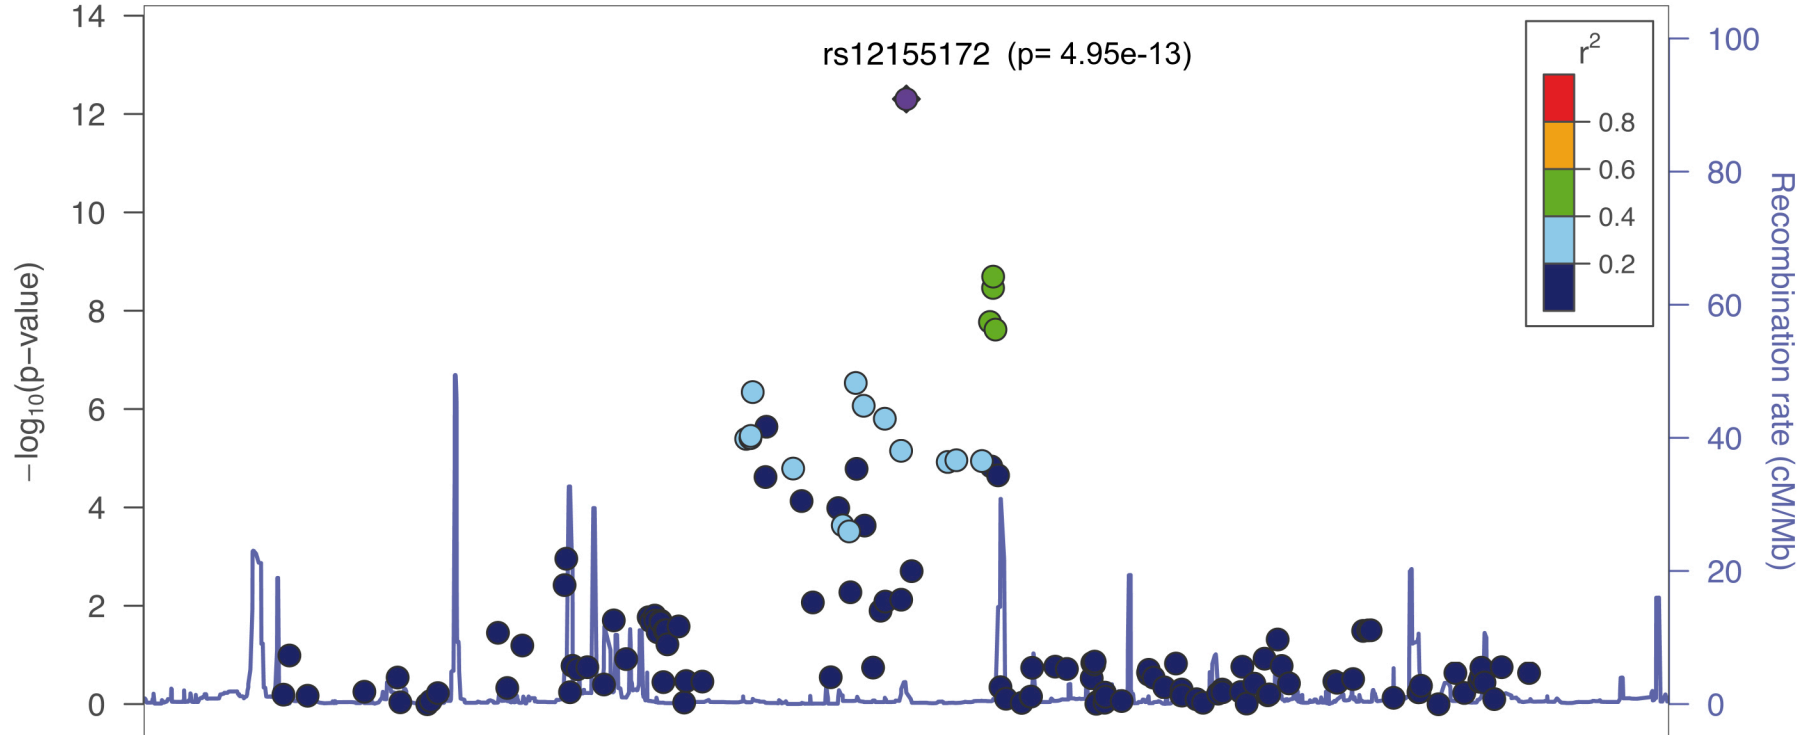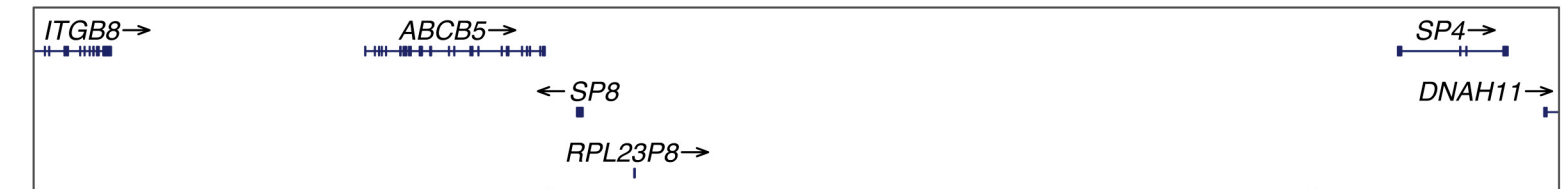

20.4      20.6      20.8      21      21.2      21.4

Position on chr7 (Mb)

# chr8:25948059 rs11135910

Our SNPs

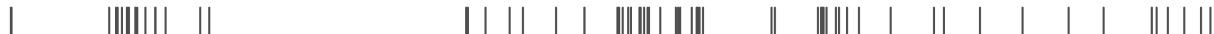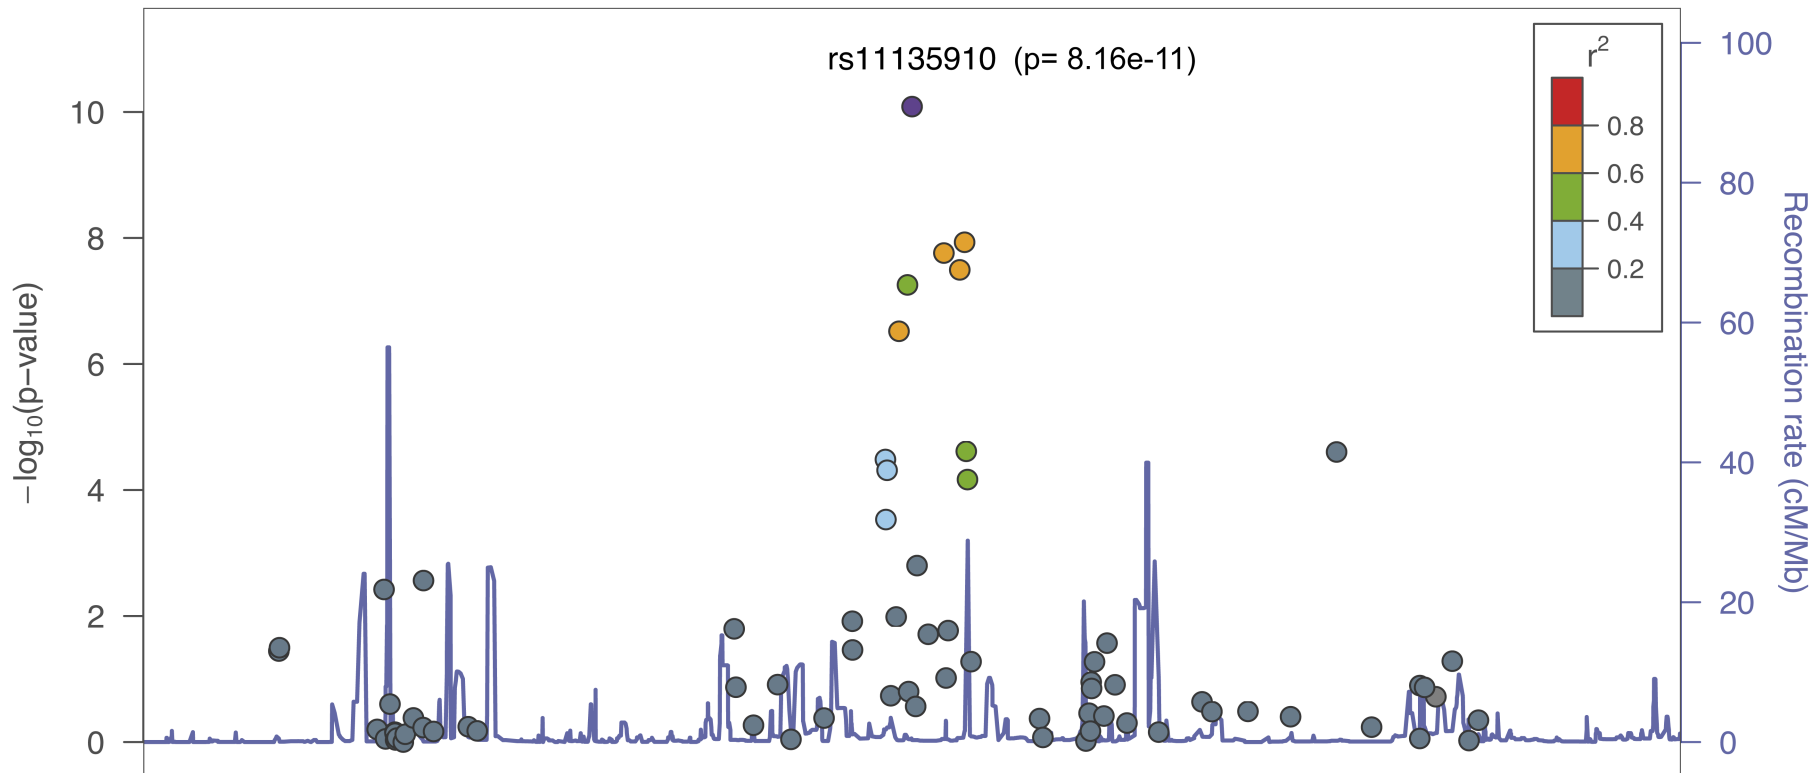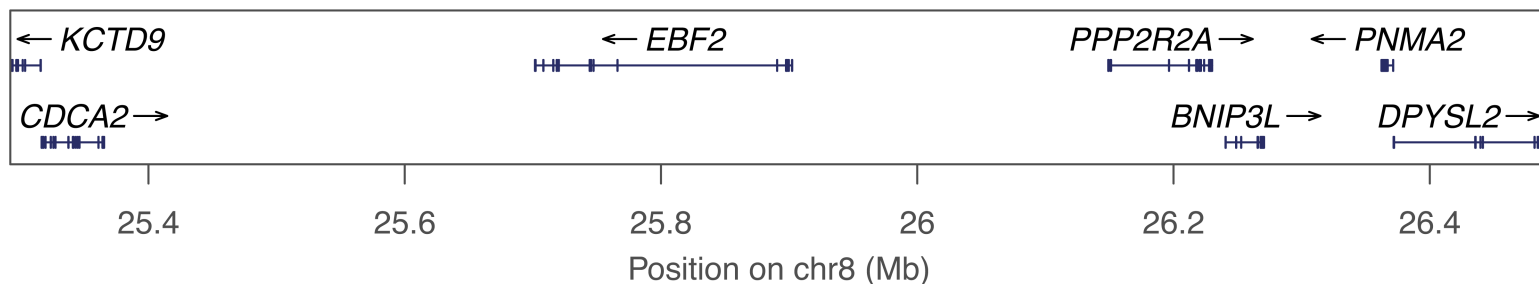



# chr12:113169954 rs1270884

Our SNPs

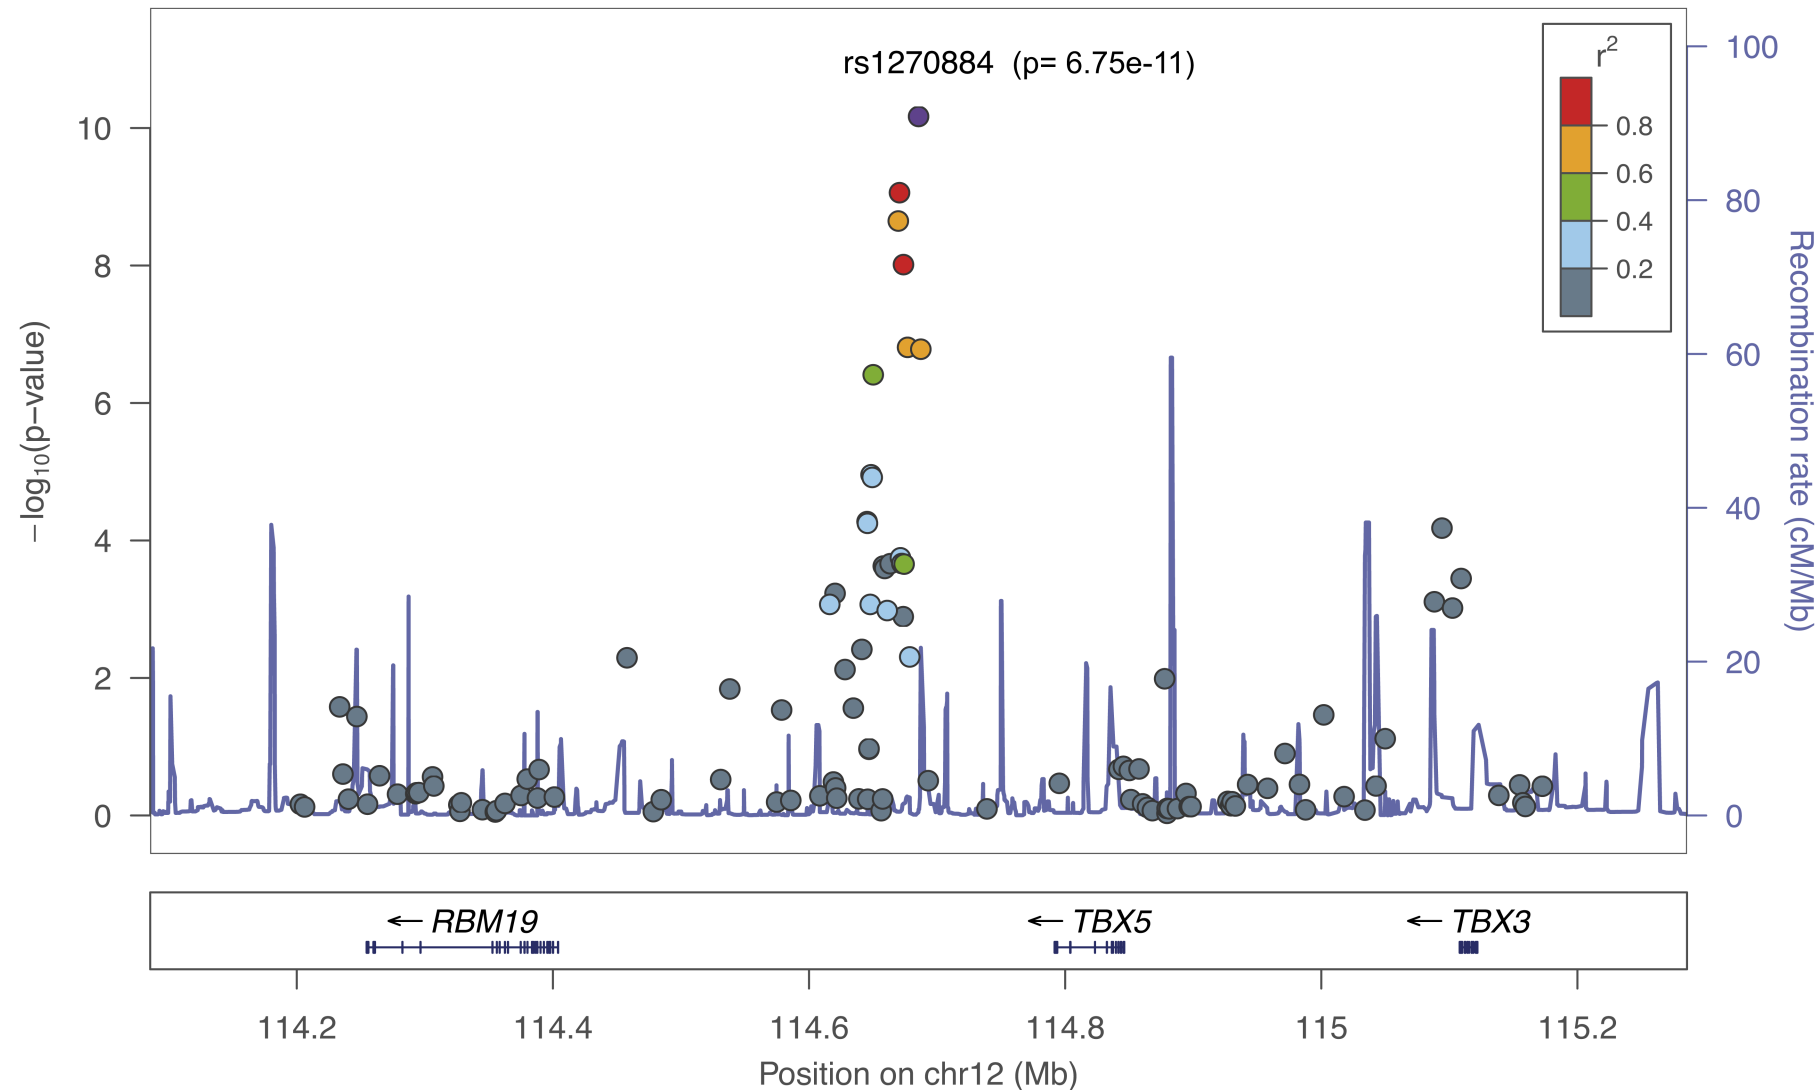



# chr14:52442080 rs8008270

Our SNPs

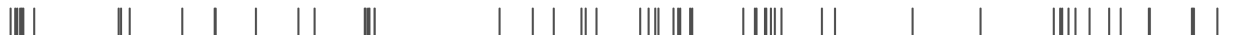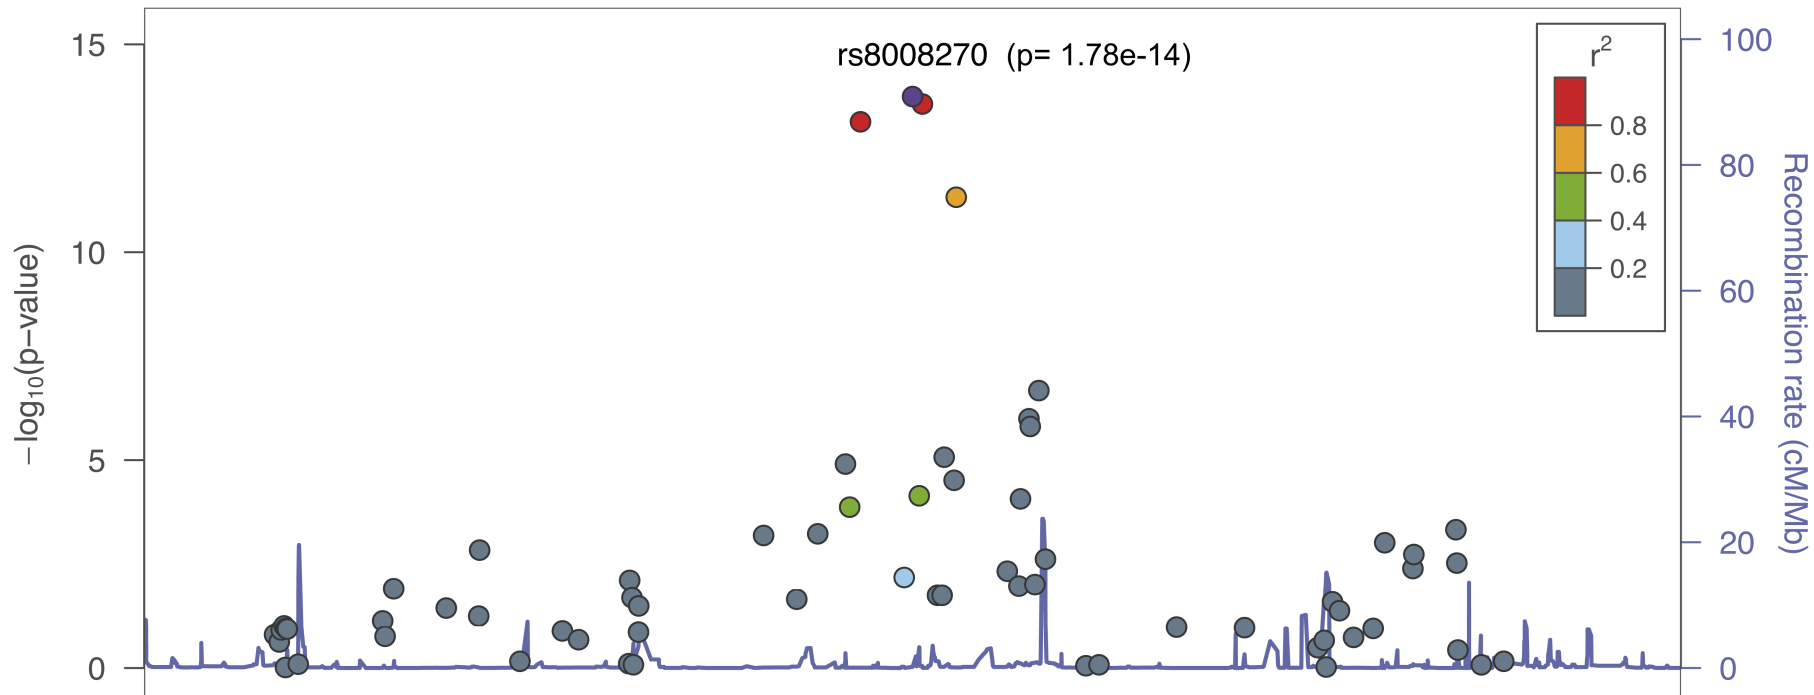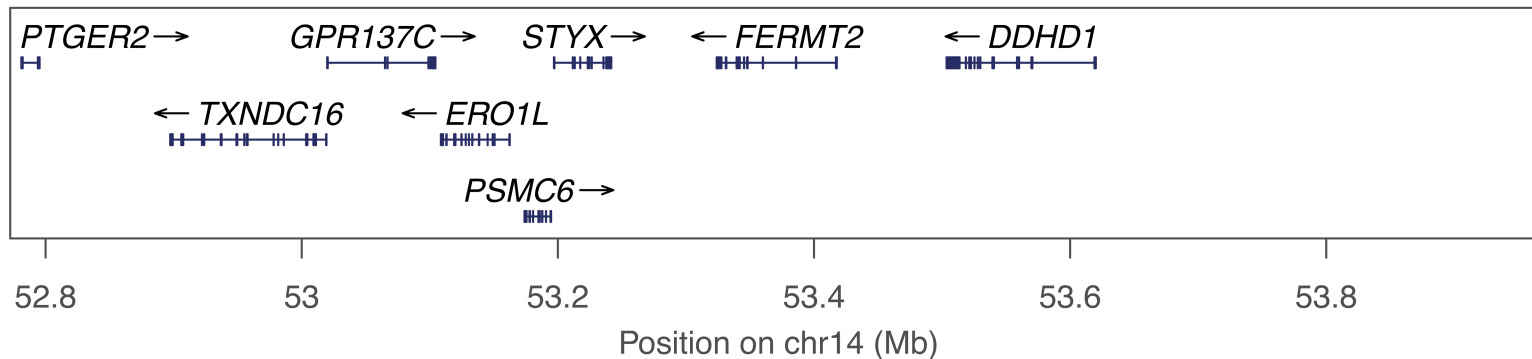

# chr17:565715 rs684232

Our SNPs

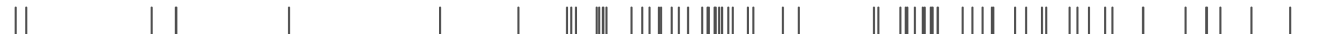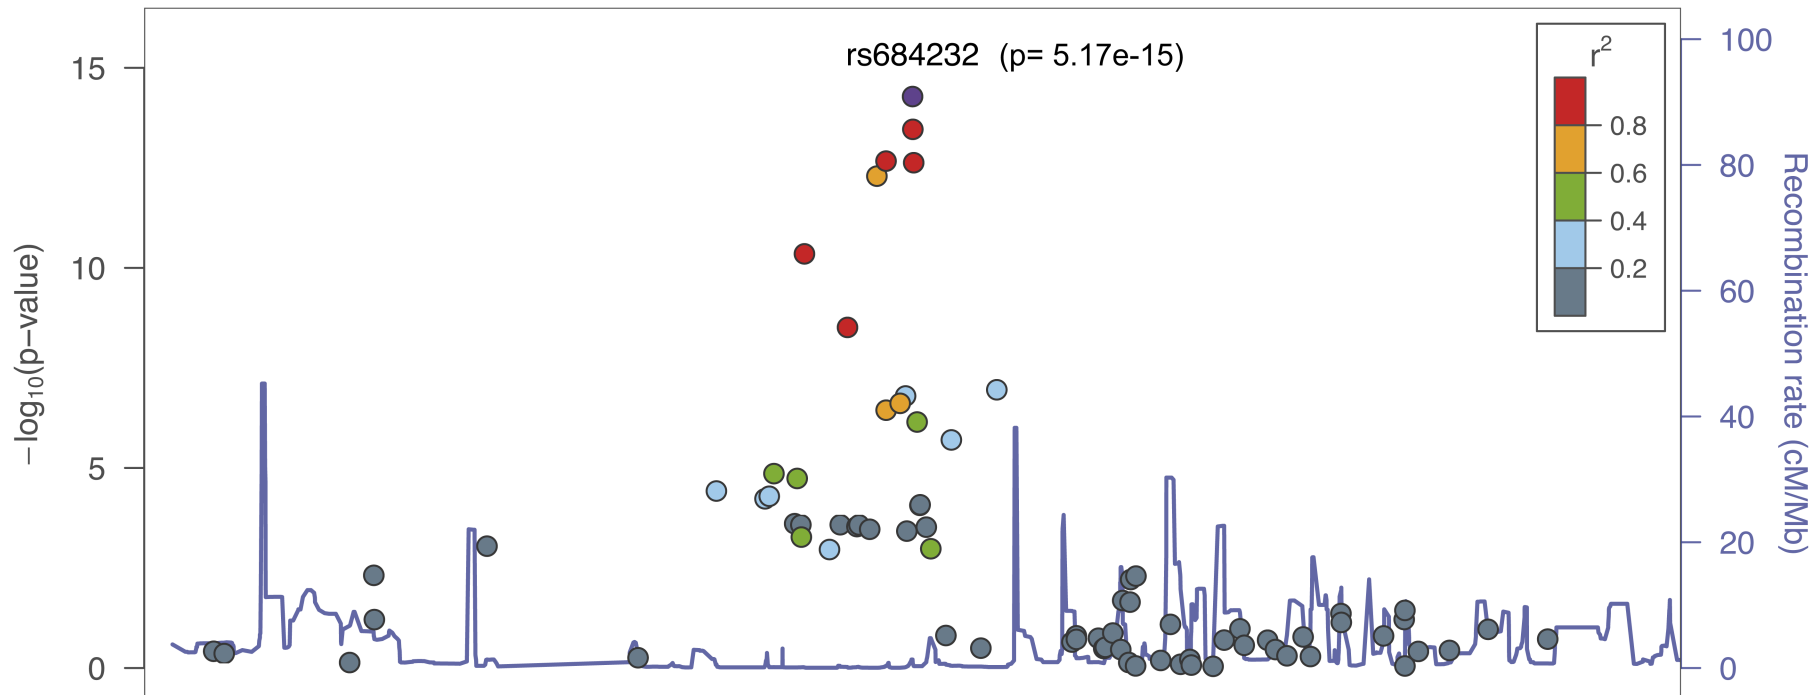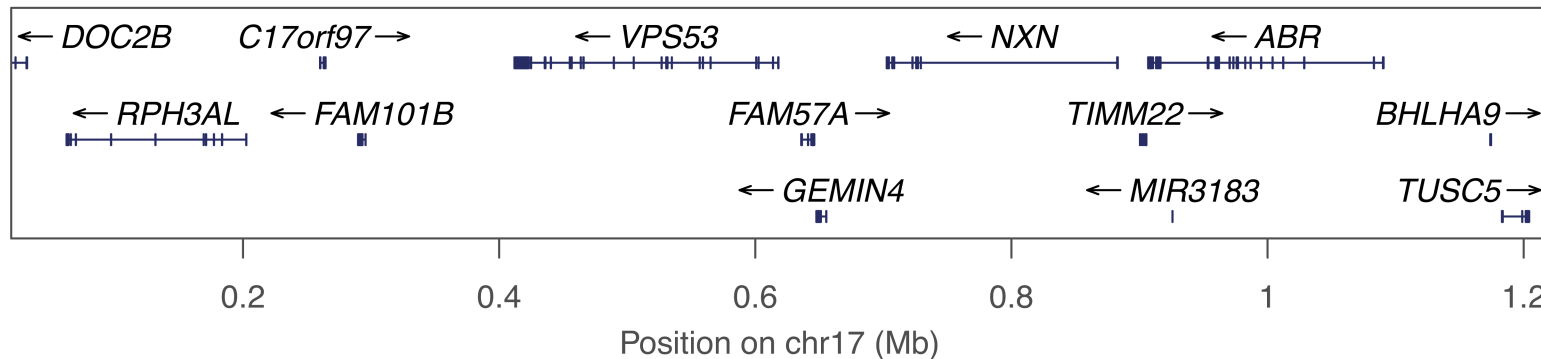

# chr18:74874961 rs7241993

Our SNPs

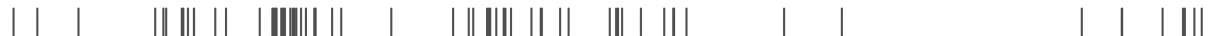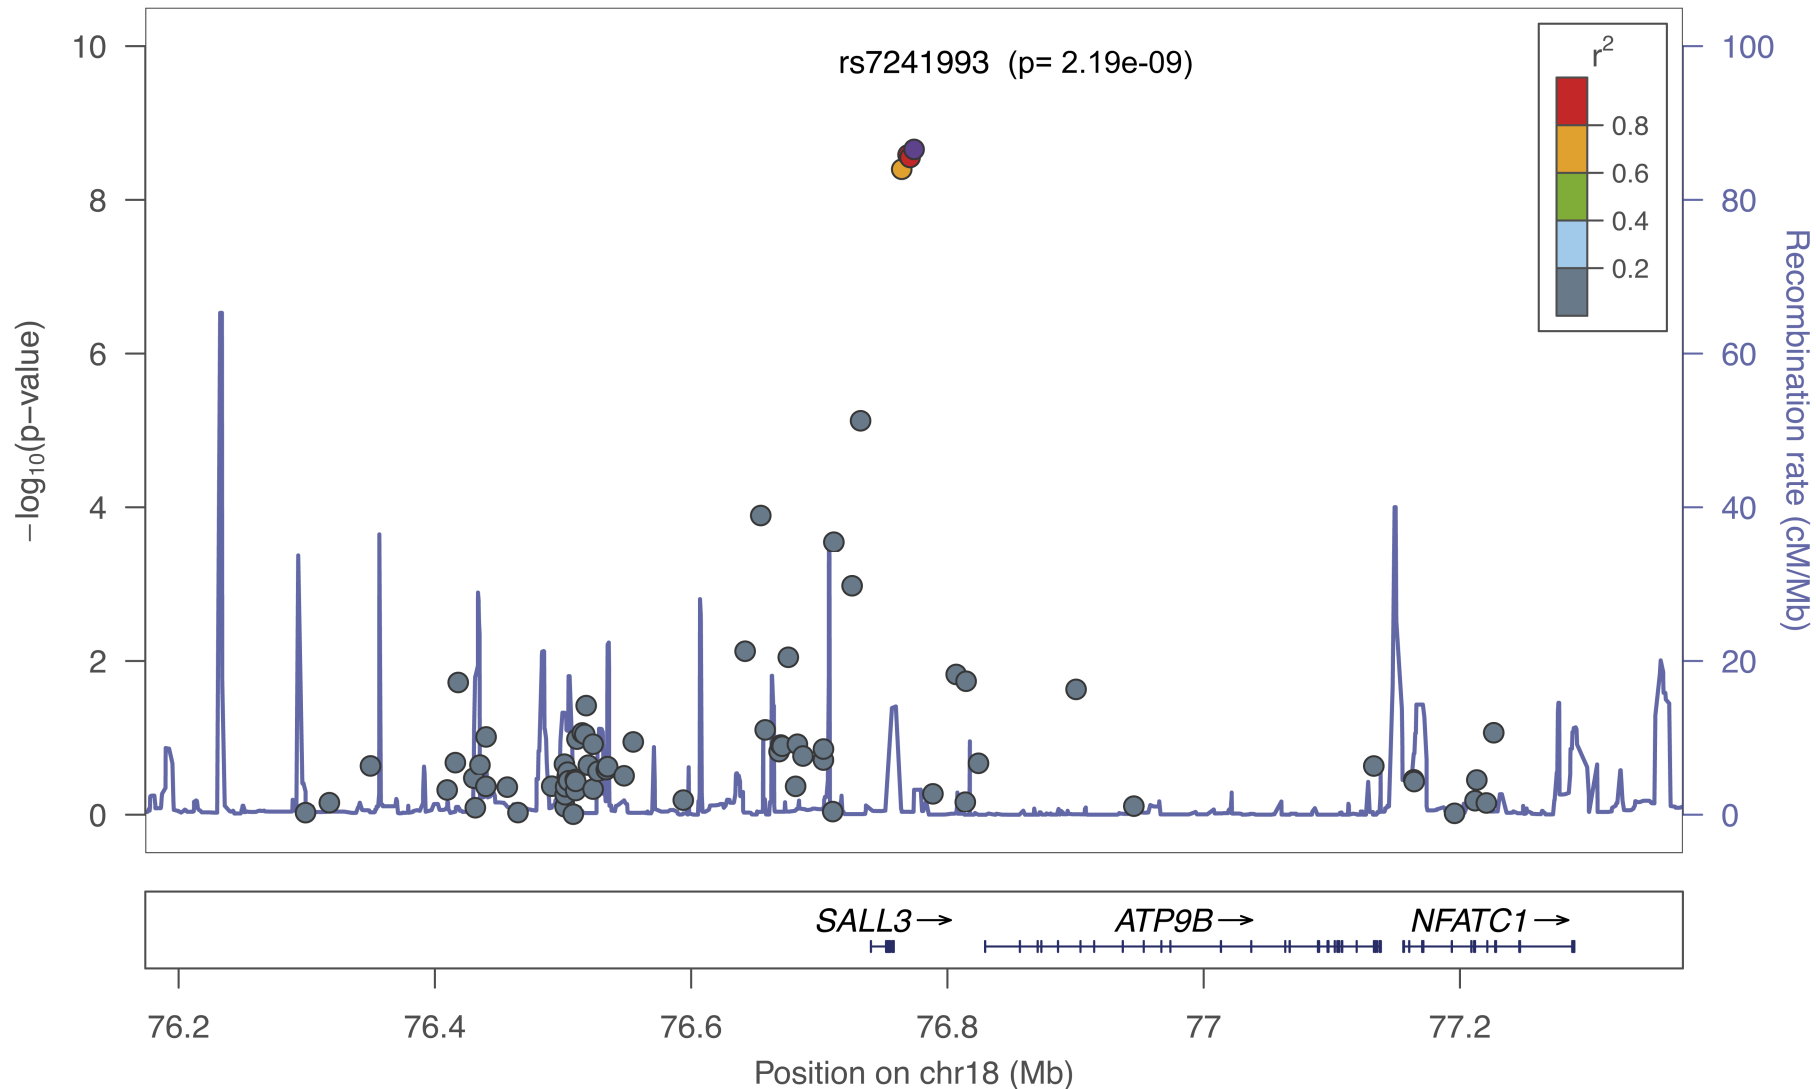

# chr20:60449006 rs2427345

Our SNPs

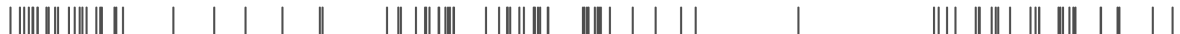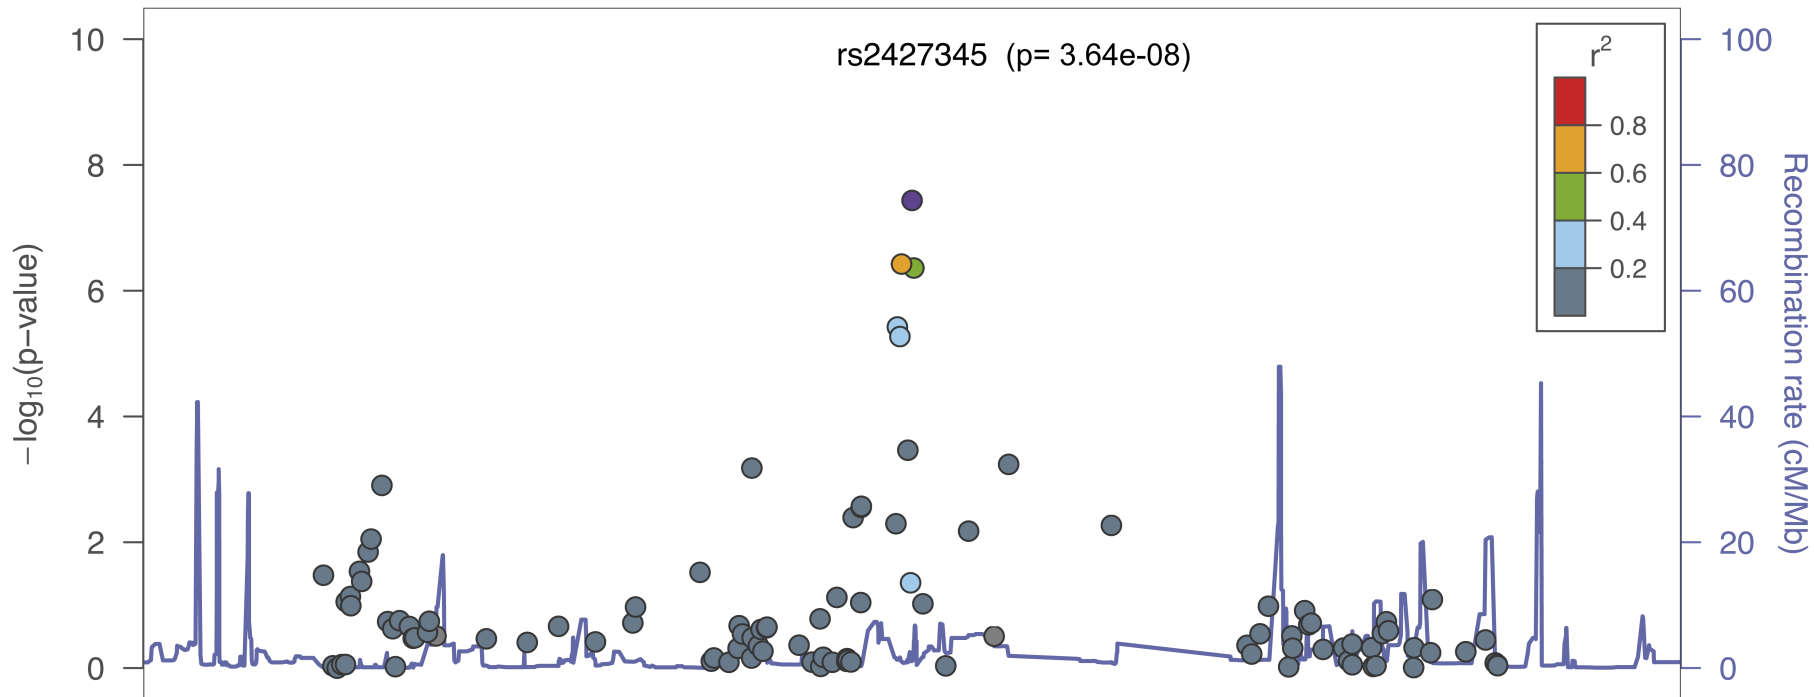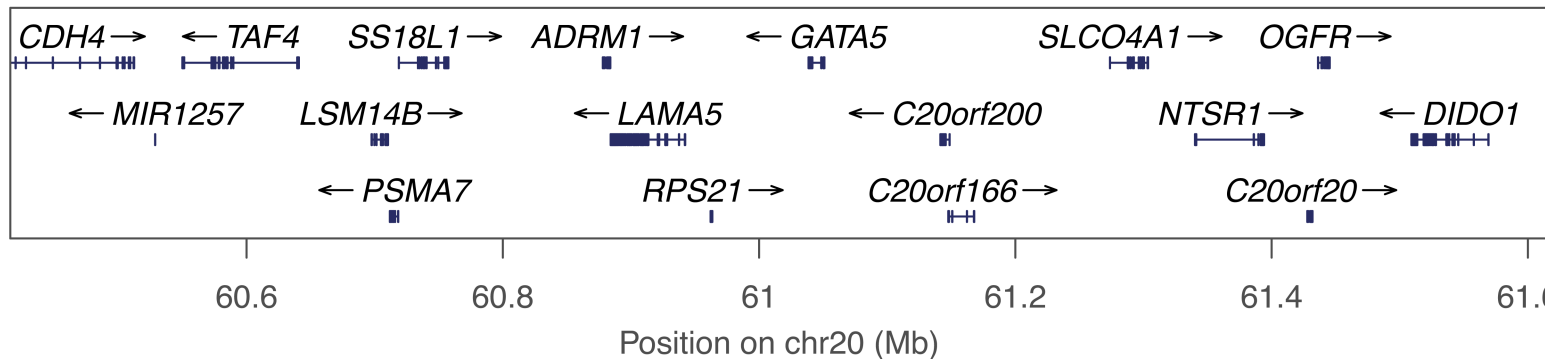

# chr20:61833007 rs6062509

Our SNPs

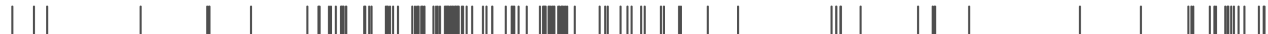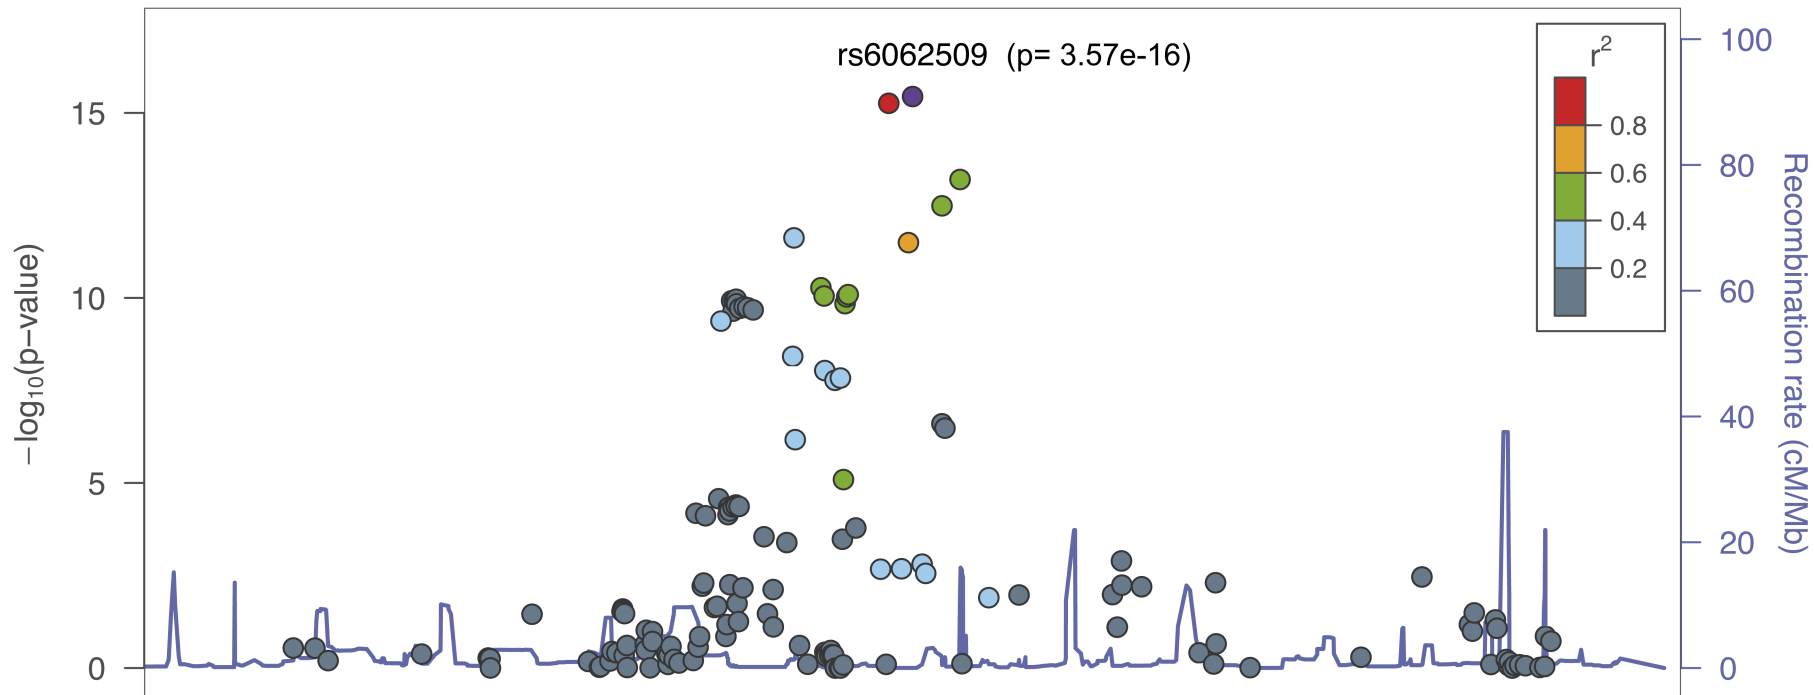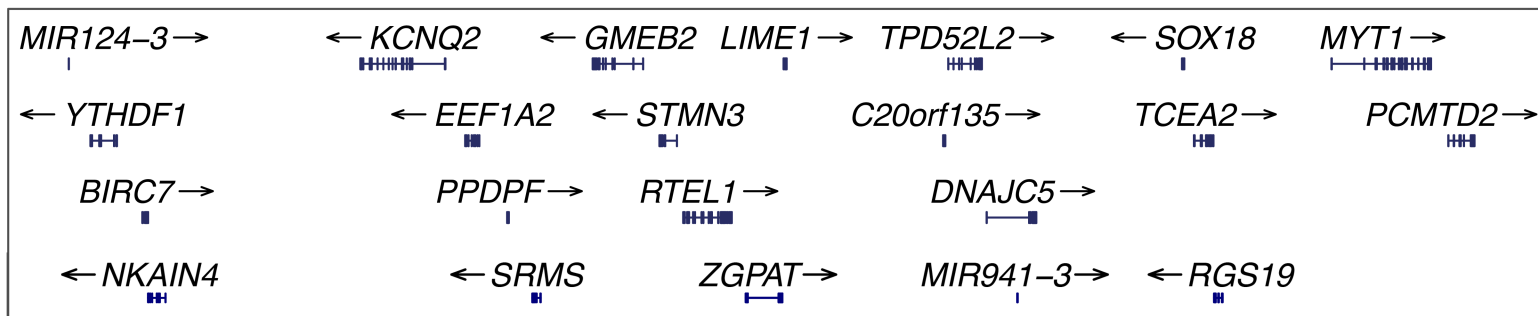

61.8                      62                      62.2                      62.4                      62.6                      62.8

Position on chr20 (Mb)

# chrX:9774135\_rs2405942

Plotted SNPs

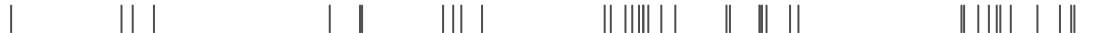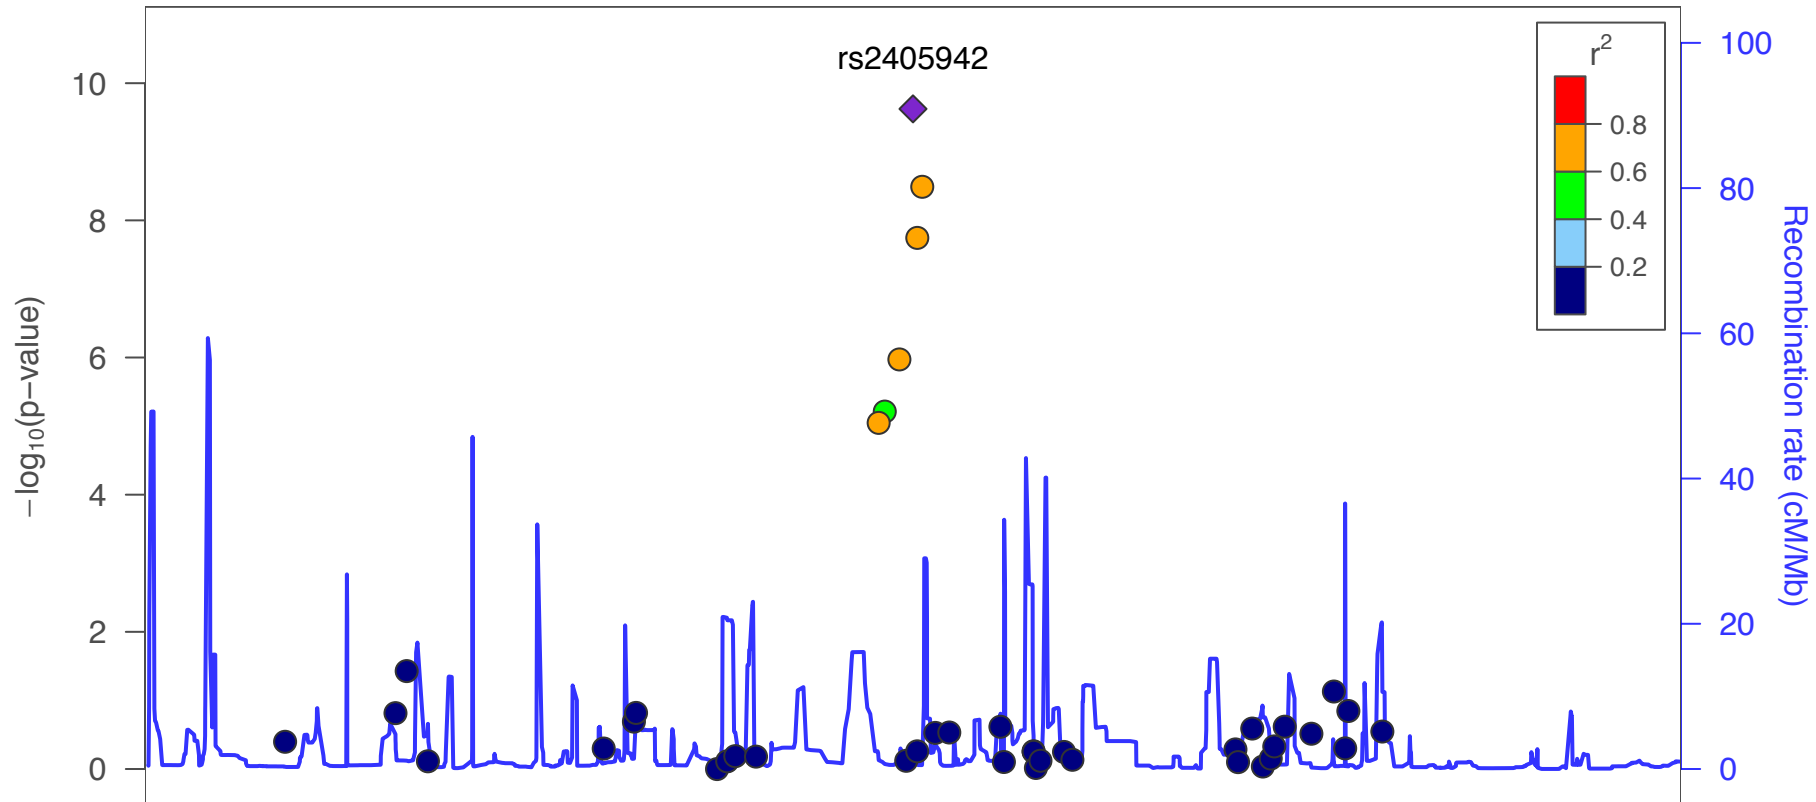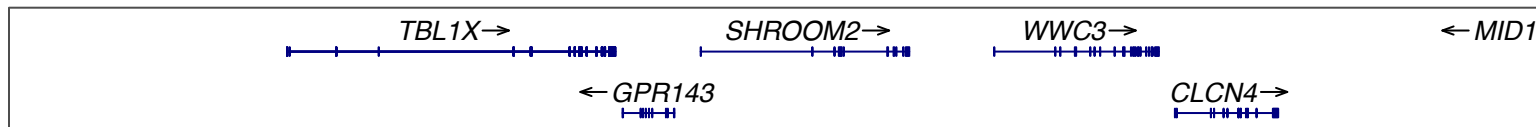

9.2 9.4 9.6 9.8 10 10.2

Position on chrX (Mb)

**Supplementary Figure 4 - Cluster plots for each of the 23 new loci in iCOGS**

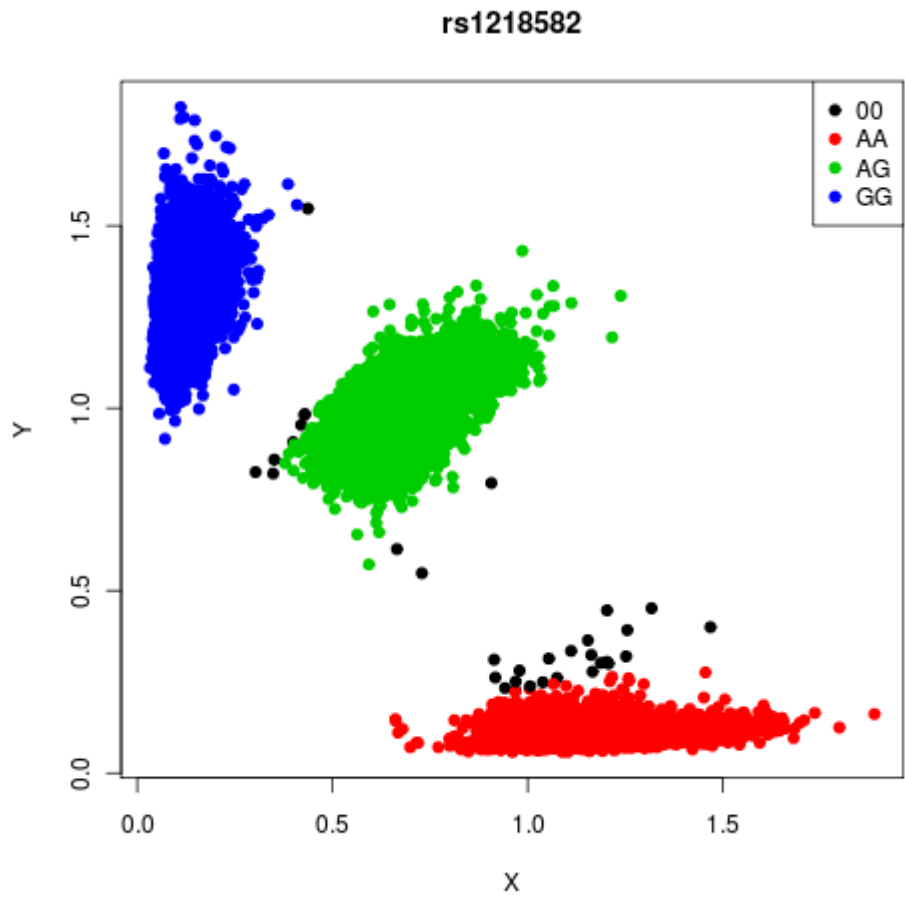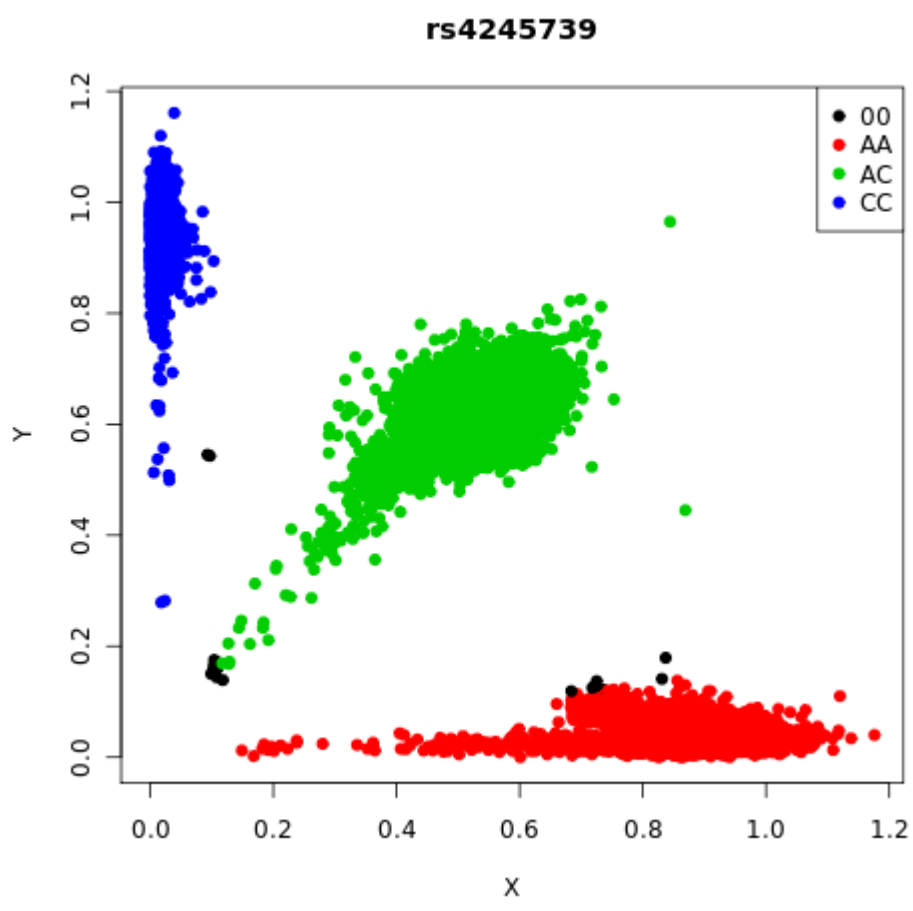

rs11902236

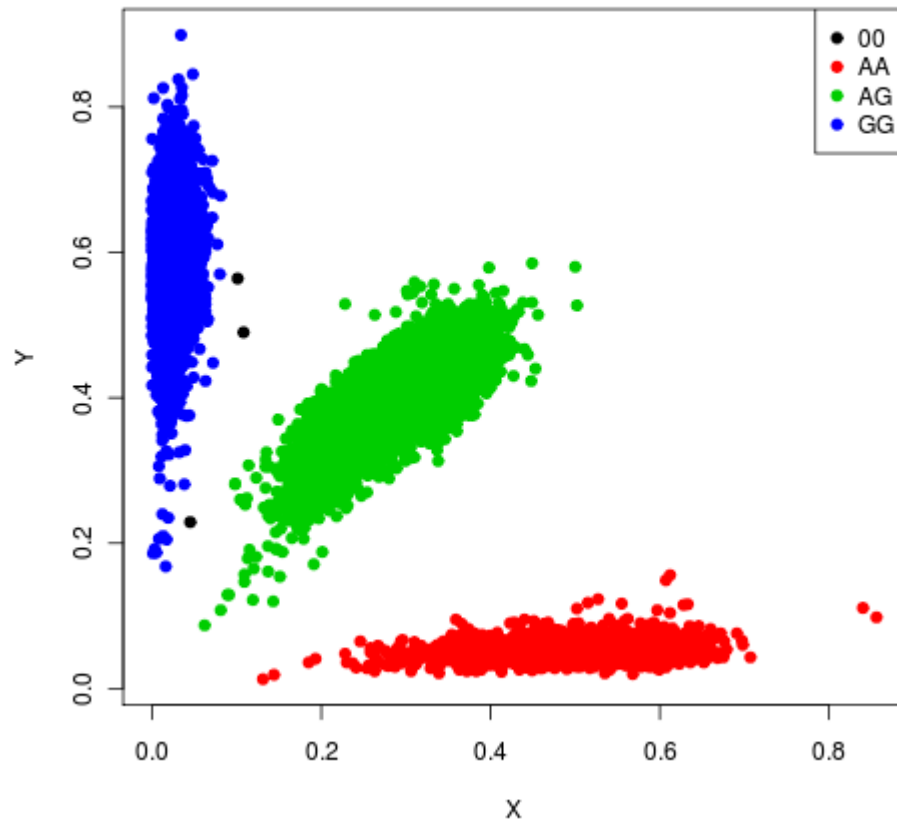

rs3771570

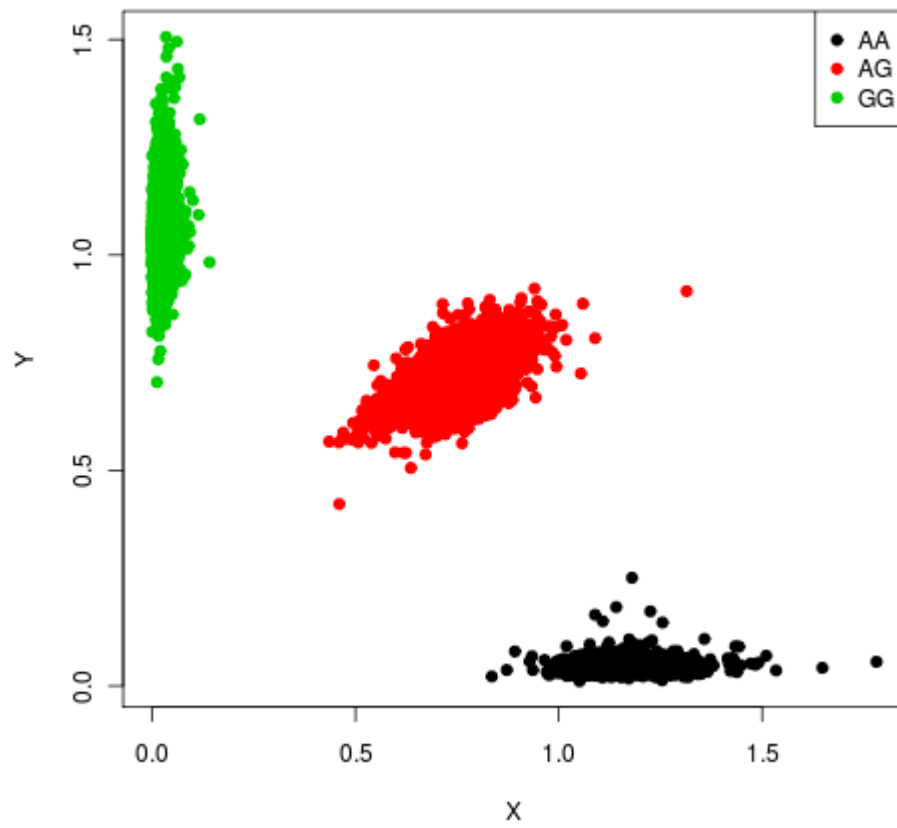



rs7611694

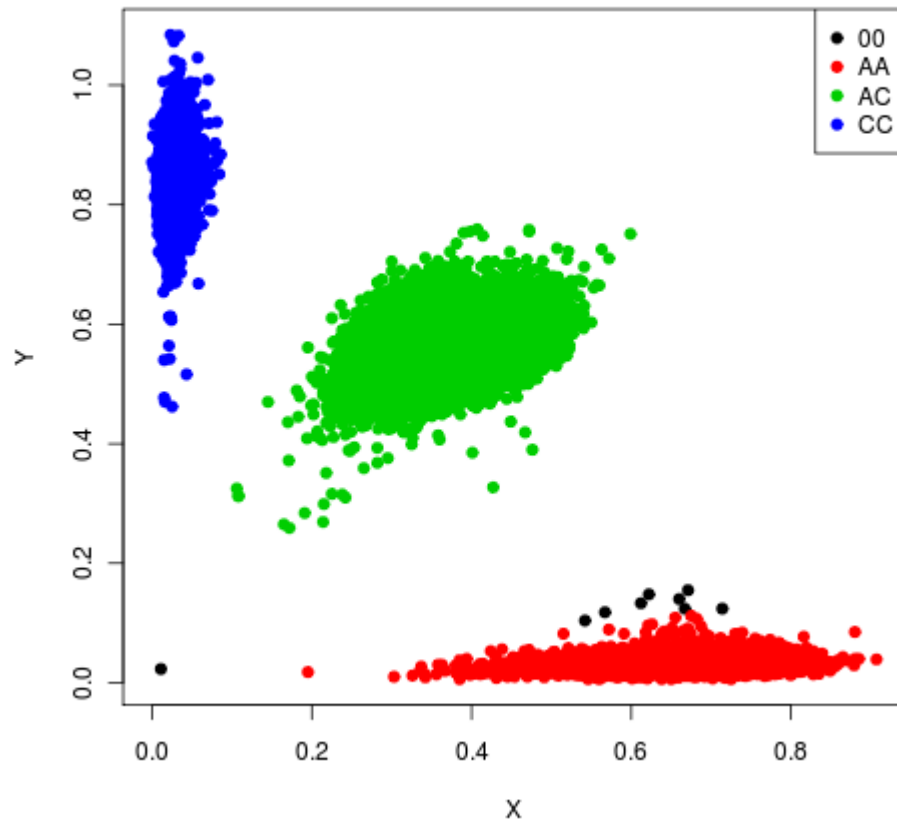

rs1894292

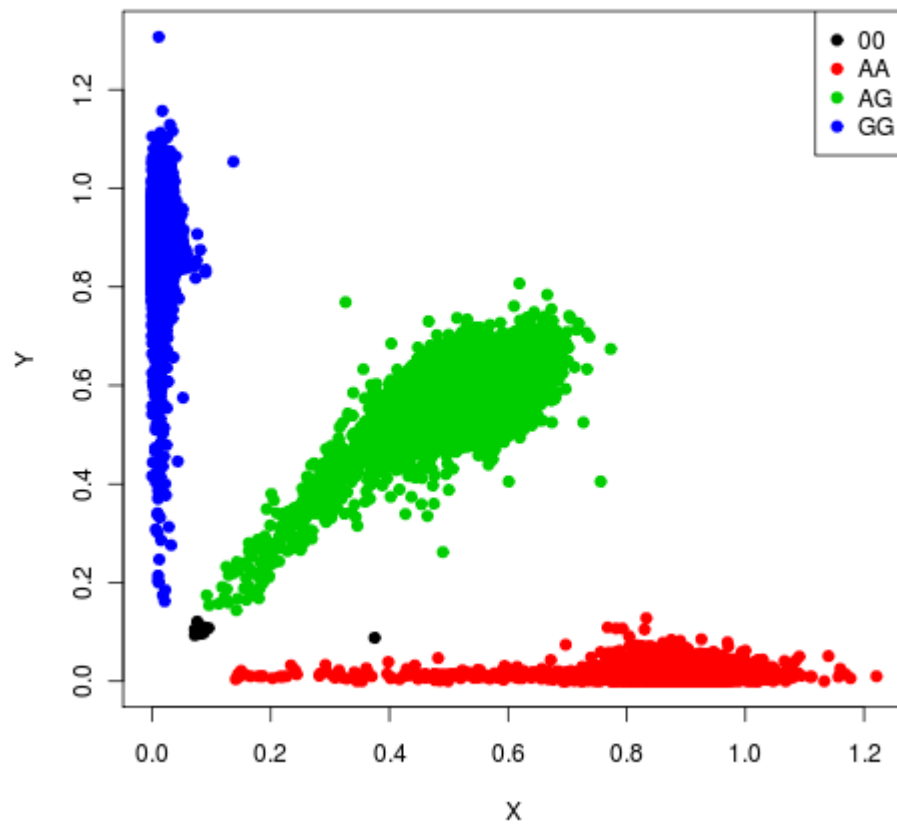

rs6869841

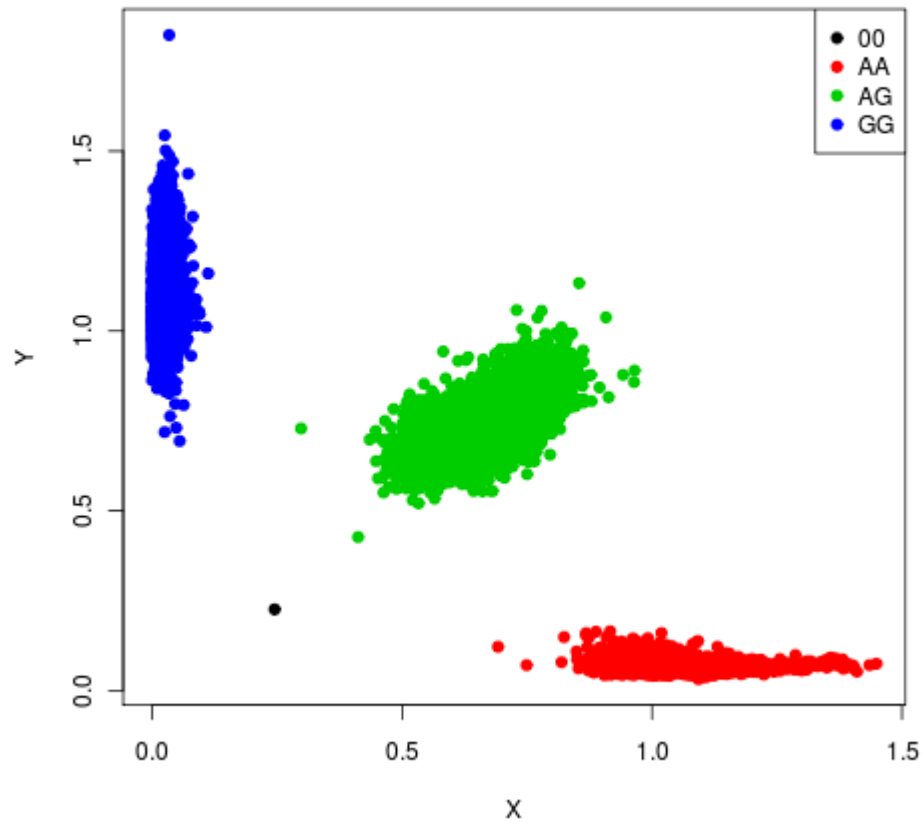

rs3096702

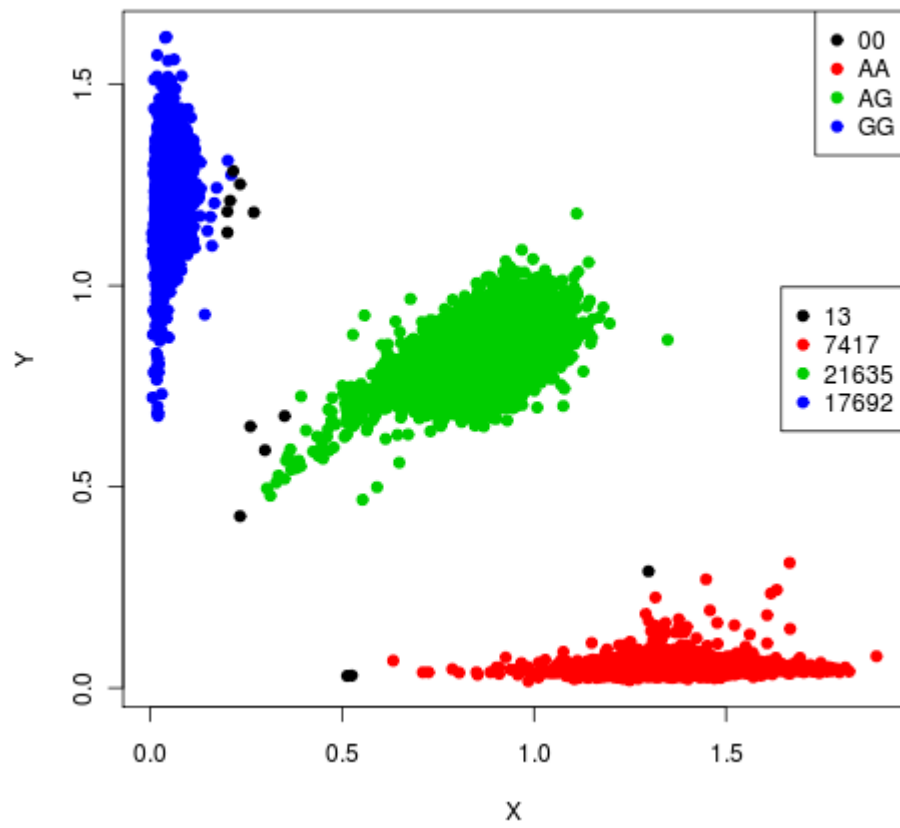

rs2273669

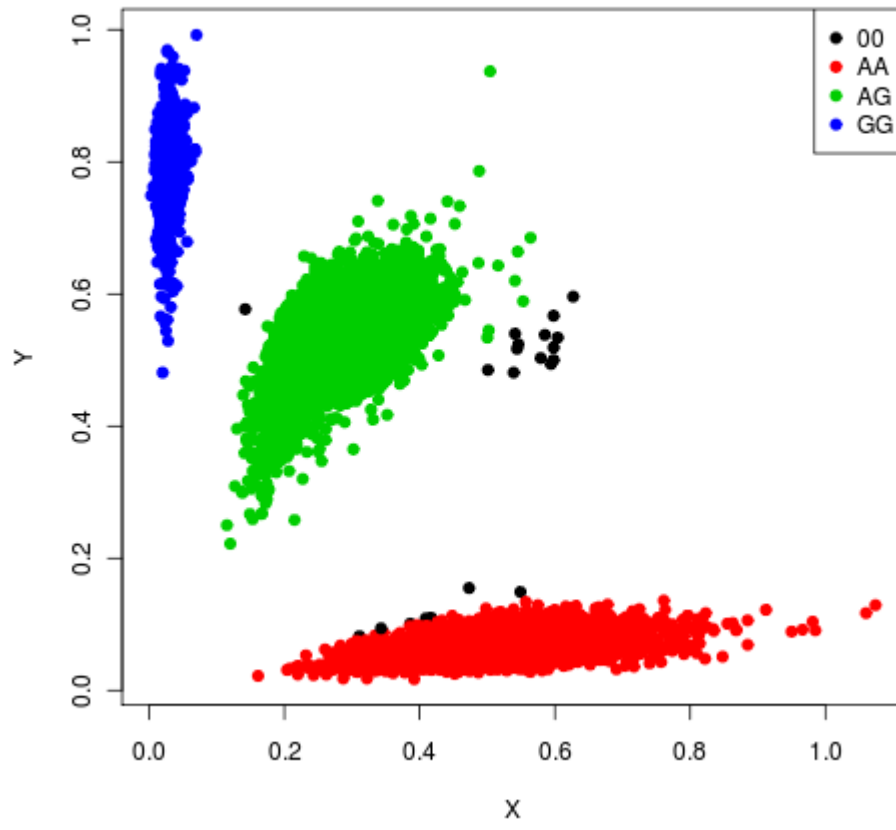

rs1933488

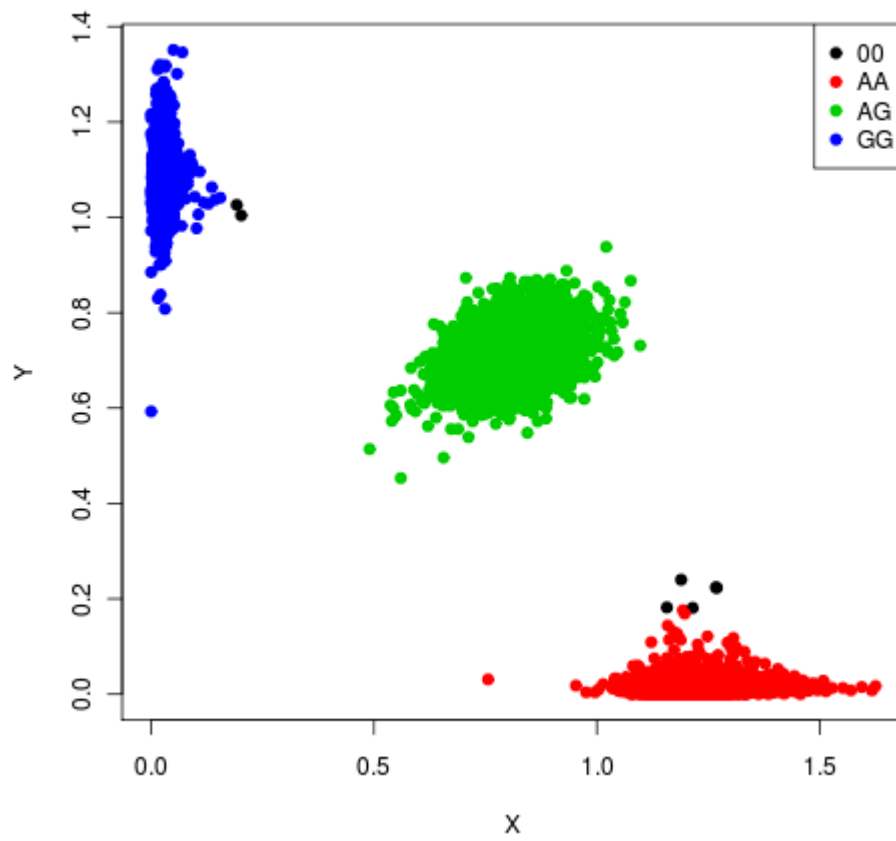

**rs12155172**

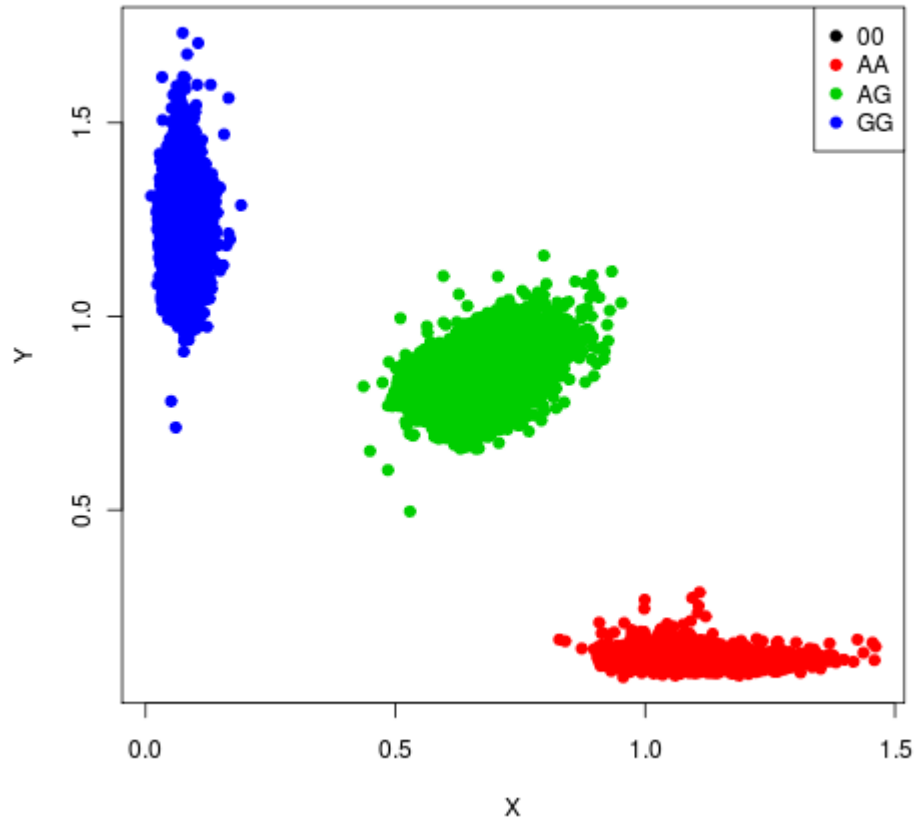

**rs11135910**

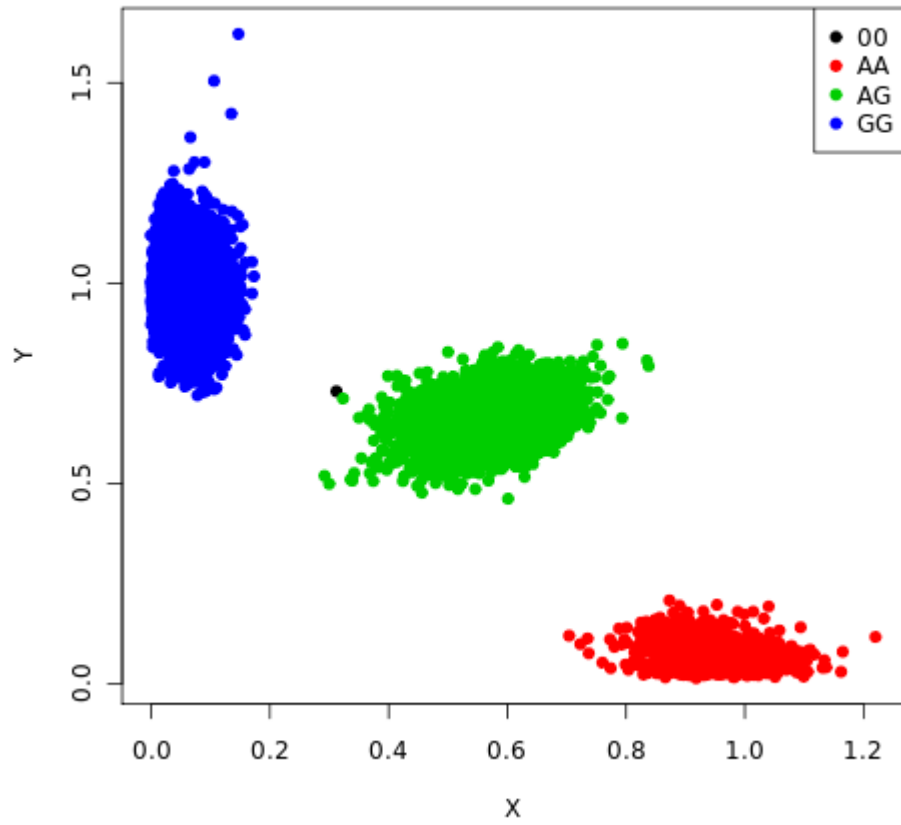

rs3850699

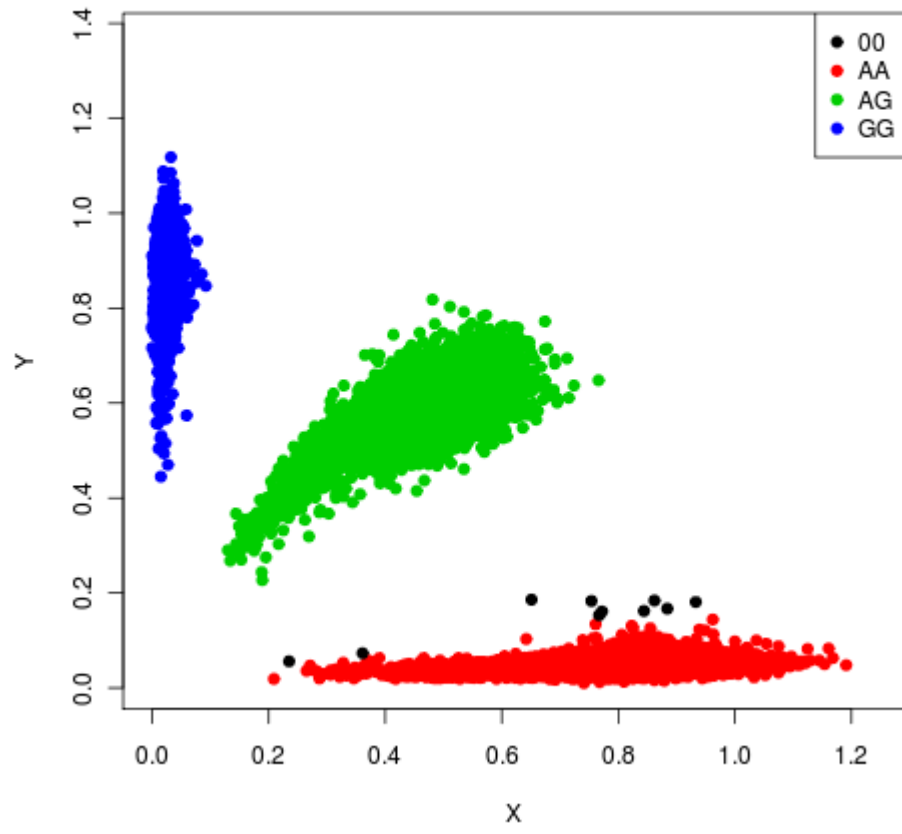

rs11568818

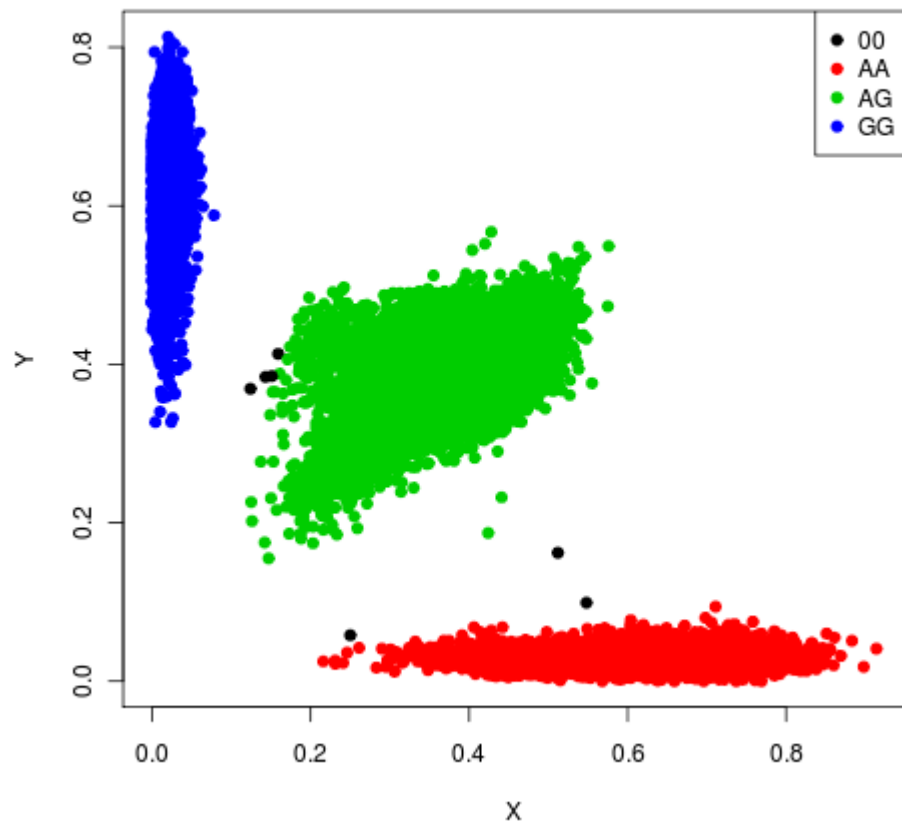

rs1270884

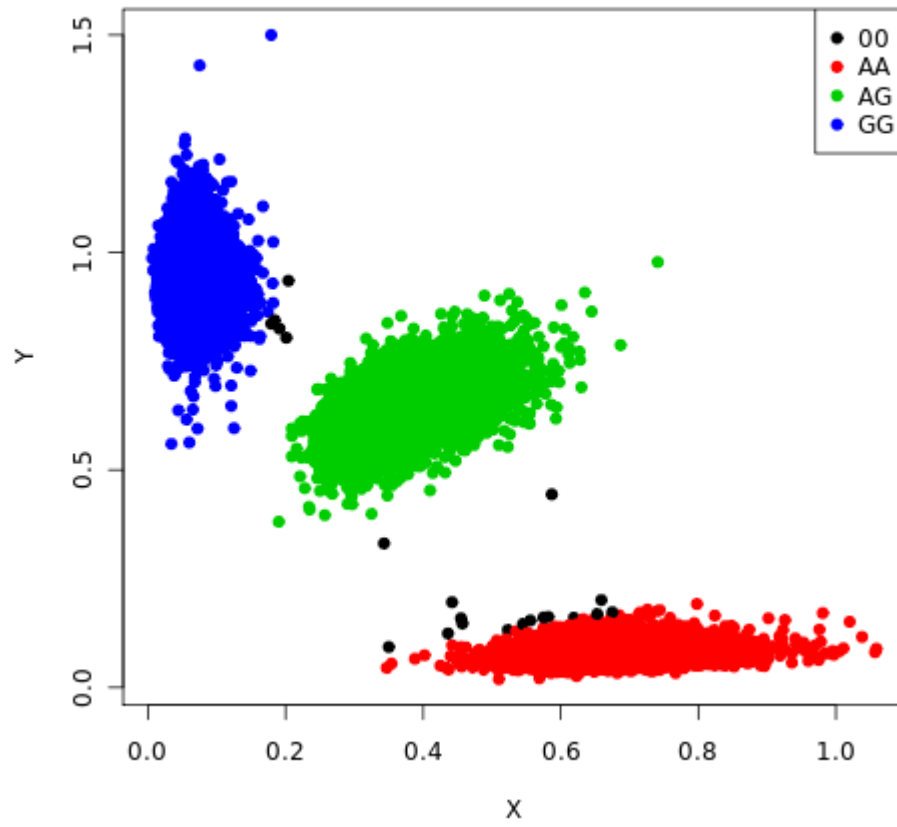

rs8008270

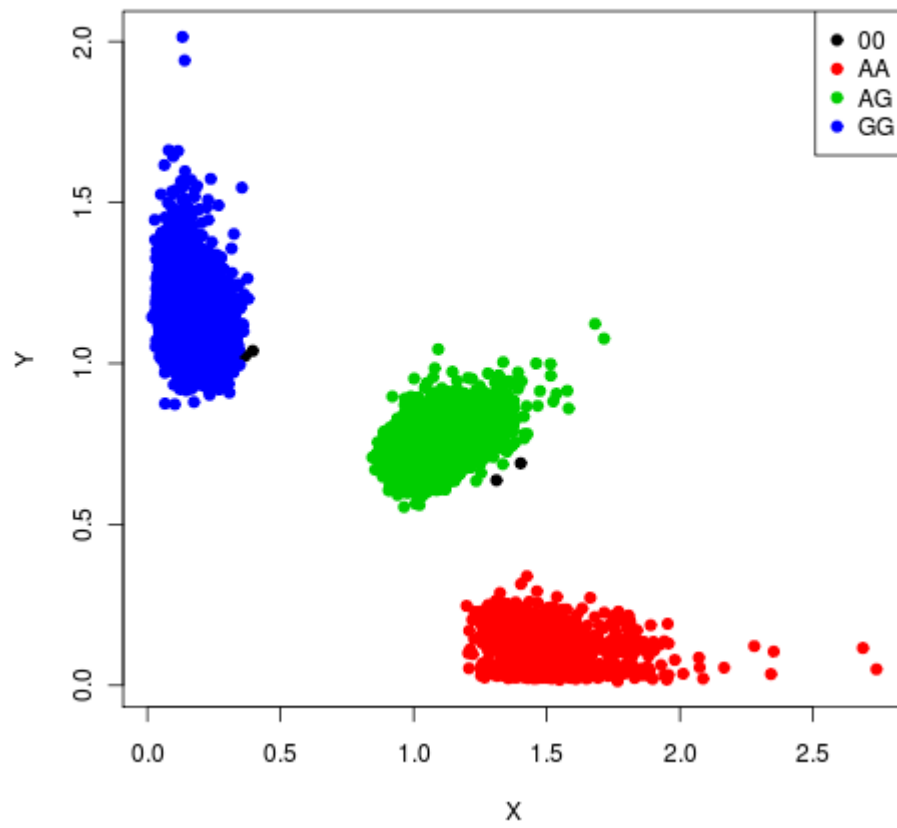

**rs7141529**

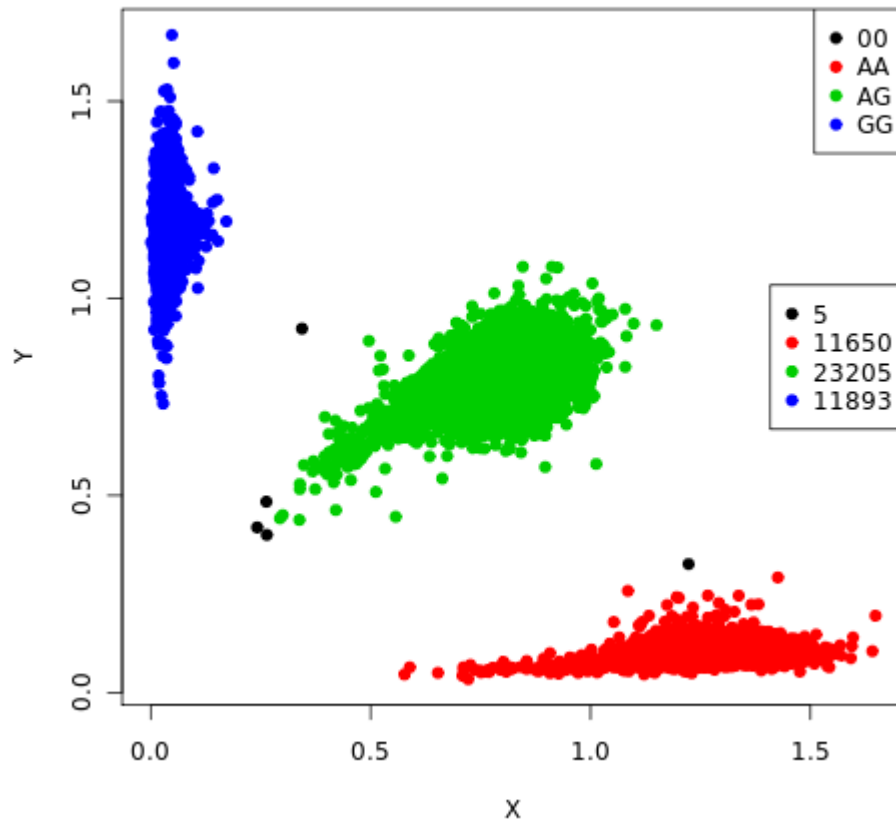

**rs684232**

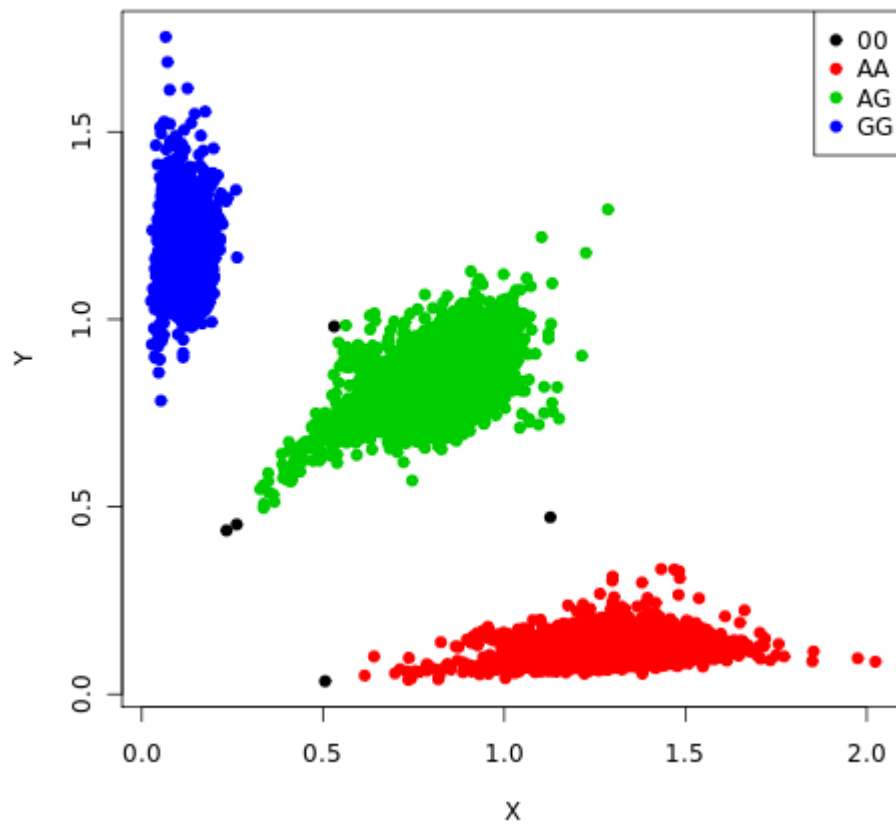

**rs11650494**

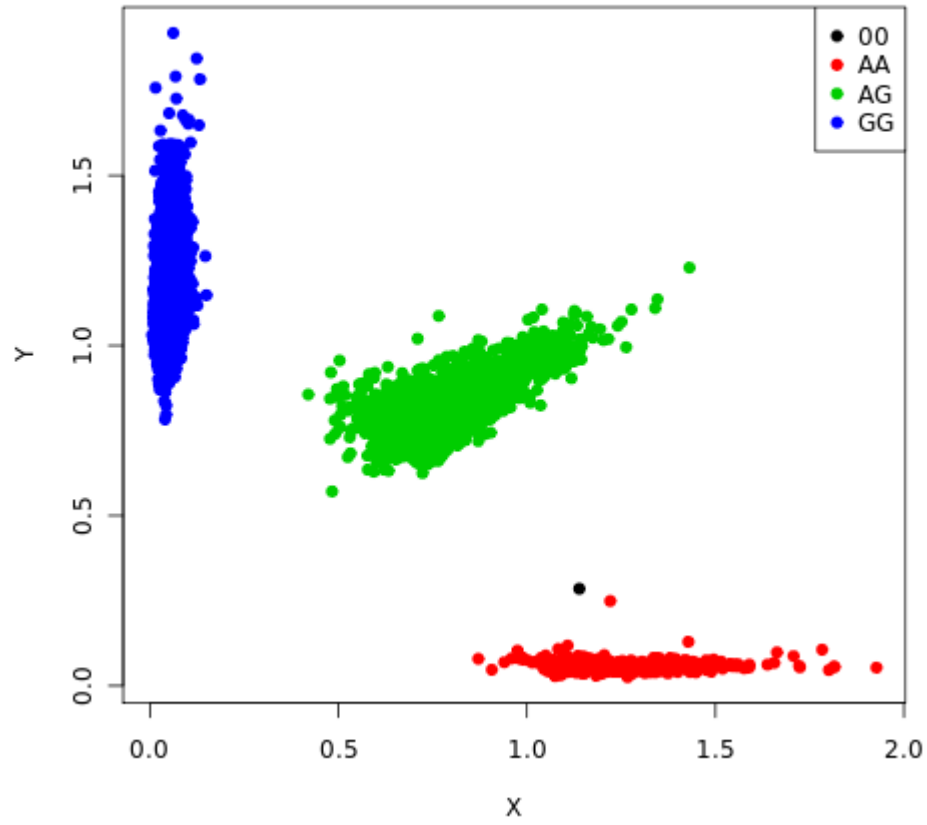

**rs7241993**

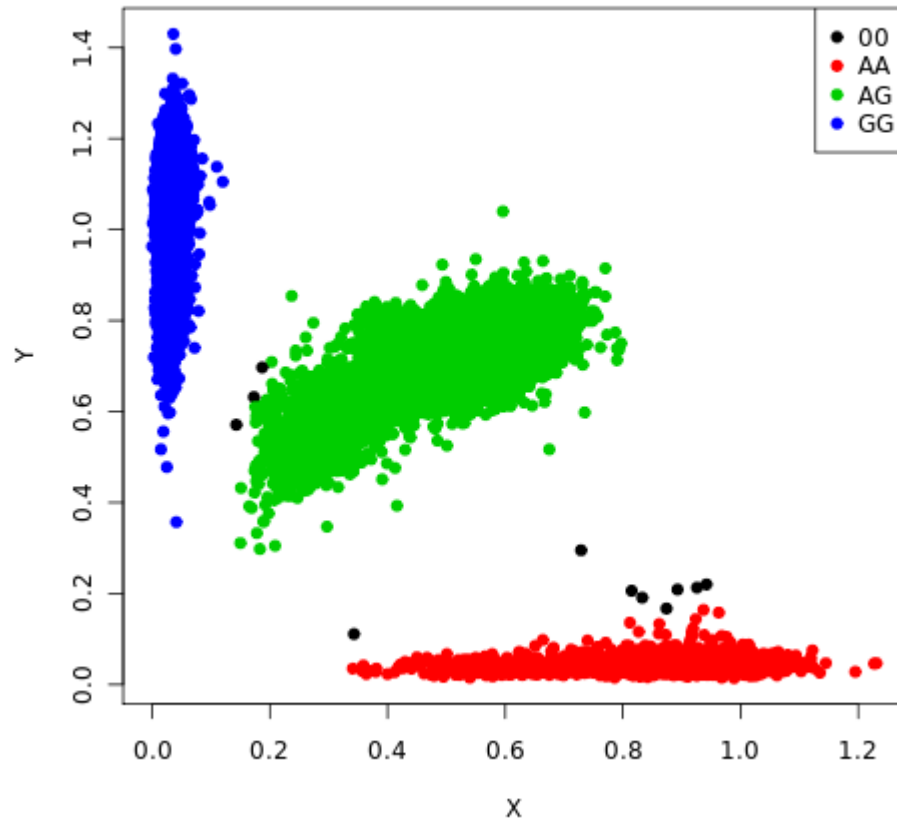



rs2427345

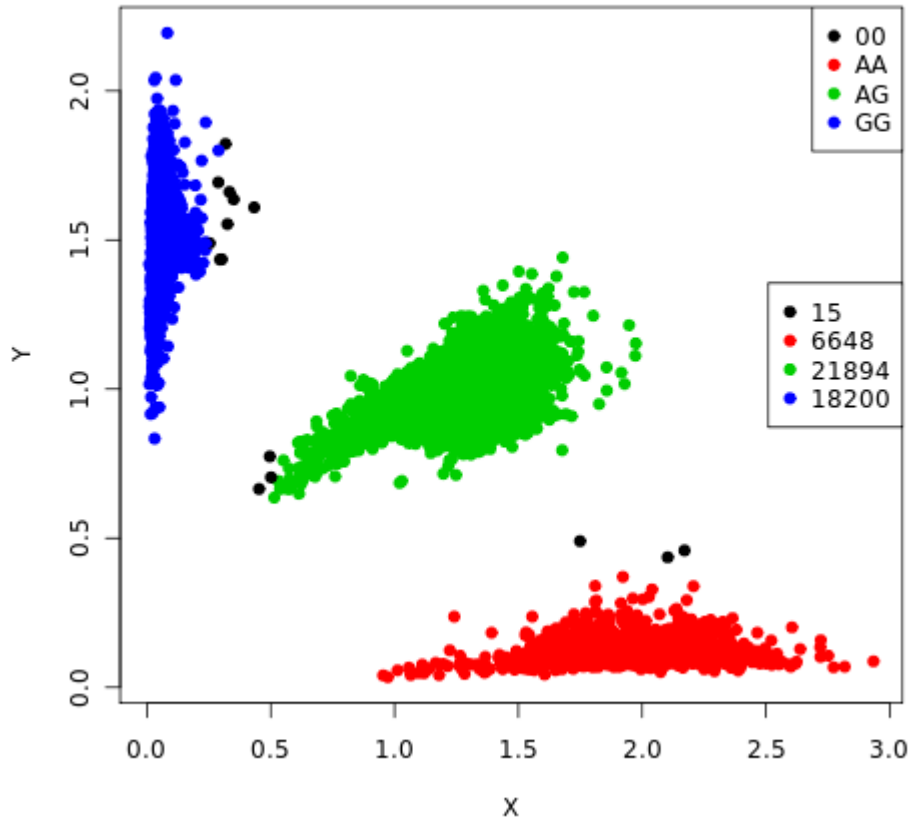

rs6062509

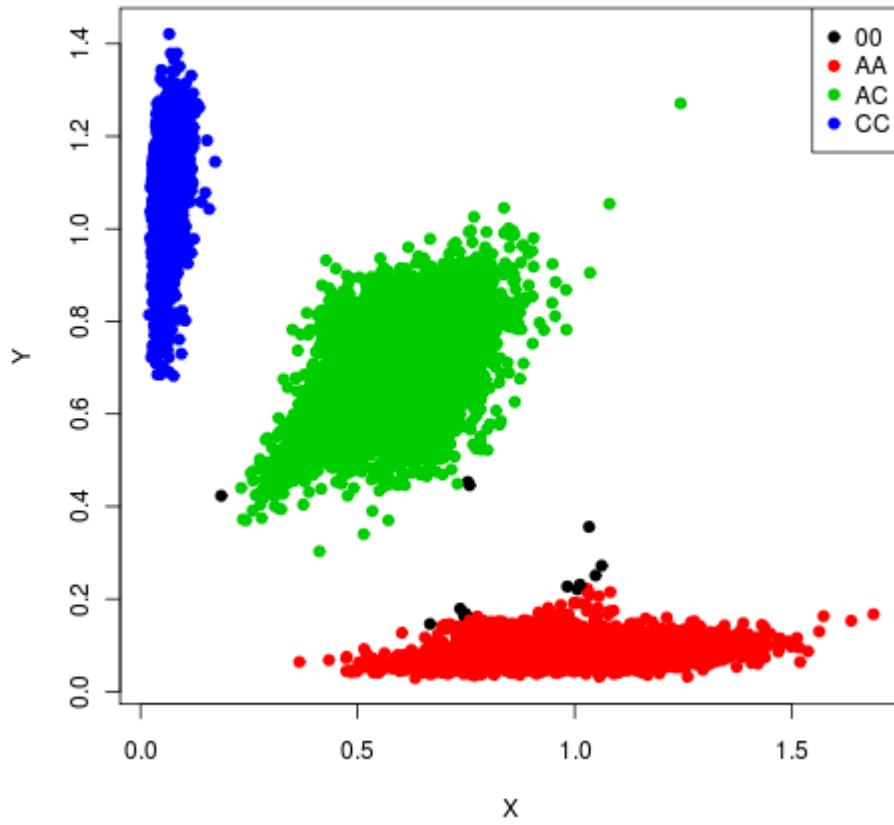

rs2405942

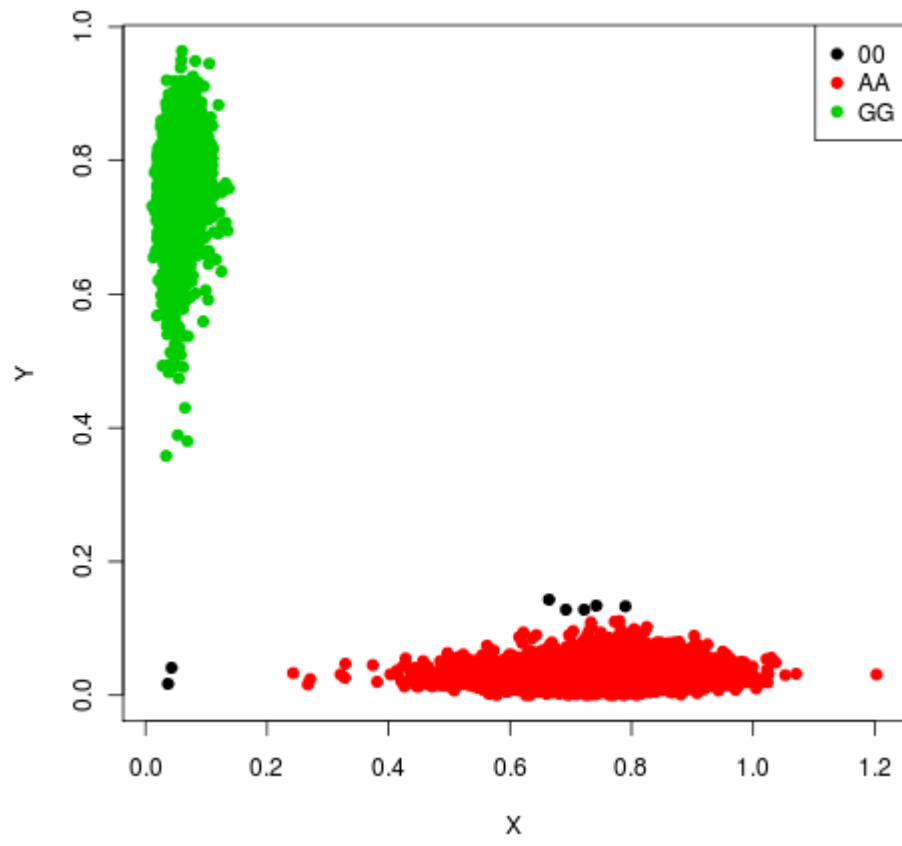

## **SUPPLEMENTARY NOTE**

### **Description of four GWAS and the PRACTICAL Consortium groups**

All studies were approved by the appropriate ethics committees and informed consent was obtained. A list of the groups is in Supplementary Table 1.

### **Combined GWAS**

#### **Stages 1 & 2 UK:**

A GWAS based on genotyping of 541,129 SNPs in 1,854 individuals with clinically detected (non PSA-screened) prostate cancer (cases) and 1,894 controls. 43,671 SNPs showing strong evidence of association in stage 1 were followed up by genotyping a further 3,268 cases and 3,366 controls from UK and Melbourne in stage2<sup>1,2</sup>.

#### **BPC3:**

Breast and Prostate Cancer Cohort Consortium (BPC3), is an NCI sponsored study combining 10 large prospective cohorts with biospecimens to conduct research on gene, environmental, and gene-environment effects in breast and prostate cancer etiology (<http://epi.grants.cancer.gov/BPC3/>). An advanced prostate cancer GWAS, where cases were defined as either a Gleason score  $\geq 8$  or tumor stage  $\geq C$ , was undertaken across 7 cohorts using the Illumina 610K SNP array for the majority of subjects. In total 2,473 advanced prostate cancer cases and 3,534 controls were included in the analysis following QC<sup>3</sup>.

#### **CAPS:**

Cancer of the Prostate in Sweden (CAPS), a population-based prostate cancer case-control study with 3,030 cases and 1,960 controls who donated blood samples during 2001-2003 (<http://ki.se/ki/jsp/polopoly.jsp?d=13809&a=29862&l=en>).

#### **CGEMS:**

Cancer Genetic Markers of Susceptibility (CGEMS; <http://www.cgems.cancer.gov/>) is a GWAS consisting of 1,117 prostate cancer cases and 1,105 controls of European ancestry nested in the

Prostate, Lung, Colorectal, and Ovarian (PLCO) Cancer Screening Trial. Cases were oversampled for aggressive prostate cancer (Stage 3 or 4 or Gleason  $\geq 7$ )<sup>4</sup>.

### **Groups with samples genotyped using iCOGs**

#### **CAPS**

The study population has been described in detail elsewhere<sup>5</sup>. Briefly, we identified and recruited biopsy confirmed prostate cancer cases from four out of six regional cancer registries in Sweden, diagnosed between July 2001 and October 2003. Clinical data including TNM stage, Gleason grade and PSA levels at time for diagnosis were retrieved through record linkage to the National Prostate Cancer Registry. Control subjects, who were recruited concurrently with case subjects, were randomly selected from the Swedish Population Registry and matched according to the expected age distribution of cases (groups of 5-year intervals) and geographic region. Whole blood was collected from all individuals for extraction of genomic DNA.

#### **CPCS1+2:**

##### **The CPCS (Copenhagen Prostate Cancer Study) 1 + 2, Copenhagen, Denmark**

The Copenhagen Prostate Cancer Study 1 included 872 unselected patients recruited with prostate cancer between 2008-2011 from Herlev Hospital, Copenhagen University Hospital, Herlev, Denmark. The Copenhagen Prostate Cancer Study 2 included 306 unselected patients with prostate cancer recruited in 2010-2011 from Rigshospitalet, Copenhagen University Hospital, Copenhagen, Denmark. PSA is not routinely screened for in Denmark, and cases are therefore mainly clinically detected. Controls were 2,777 (CPCS1) and 798 (CPCS2) prostate cancer free men from the general population, whom participated in the Copenhagen City Heart Study. Diagnosis of prostate cancer was confirmed by fully trained pathologists. All participants were white and of Danish descent. Participants filled out questionnaires, gave blood samples for DNA extraction and gave written informed consent.

#### **EPIC: European Prospective Investigation into Cancer and Nutrition**

The European Prospective Investigation into Cancer and Nutrition (EPIC) is a prospective study designed to investigate both genetic and non-genetic risk factors for different forms of cancer. Study participants were almost all white Europeans. Approximately 500,000 individuals (150,000 men) in EPIC were recruited between 1992 and 2000, from 23 centres in 10 European countries. Overall approximately 400,000 subjects also provided a blood sample at recruitment. The methods of recruitment and details of the study design are described in detail elsewhere<sup>6</sup>.

In brief, study participants completed an extensive questionnaire on both dietary and nondietary data at recruitment. The present study includes 1673 prostate cancer cases matched to 2153 controls based on study center, length of follow-up, age at enrollment ( $\pm 6$  months), fasting and time of day of blood collection ( $\pm 1$  hour). The prostate cancer subjects were from 8 of the 10 participating countries: Denmark, Germany, Greece, Italy, the Netherlands, Spain, Sweden and the United Kingdom (UK). France and Norway were not included in the current study because these cohorts only included female subjects. All participants gave written consent for the research and approval for the study was obtained from the ethical review board from all local institutions in the regions where participants had been recruited for the EPIC study.

### **ESTHER**

In the ESTHER study, patients with a first diagnosis of prostate cancer at age 50-75 years were recruited in hospitals and medical practices in Saarland, a state located in southwest Germany, from 2001 to 2003. Controls were selected from participants of a general health-check up within the same age range (and frequency matched to the cases by 5-year age groups) who were recruited in general practices in Saarland in 2000-2002. Cases and controls who were almost exclusively of European descent, filled out a detailed standardized questionnaire on life time history of potential risk factors and had a blood sample taken, and medical data were extracted from medical records.

### **FHCRC: Fred Hutchinson Cancer Research Center, Seattle US**

The study population consists of participants from two population-based case-control studies in Caucasian and African American residents of King County, Washington (Study I and Study II), which have been previously described<sup>7</sup>. Incident cases with histologically confirmed prostate cancer were ascertained from the Seattle-Puget Sound Surveillance, Epidemiology and End Results cancer registry. In Study I, cases were diagnosed between January 1, 1993, and December 31, 1996 and were 40-64 years of age at diagnosis. In Study II, cases were diagnosed between January 1, 2002, and December 31, 2005 and were 35-74 years of age at diagnosis. Overall, 2,244 eligible prostate cancer patients were identified and 1,754 (78%) were interviewed. Blood samples yielding sufficient DNA for genotyping were drawn from 1,457 (83%) cases who completed the study interview. A comparison group of controls without a history of prostate cancer, residing in King County, Washington, was identified for each study using random digit telephone dialling. Controls were frequency-matched to cases by five-year age groups and recruited evenly throughout each ascertainment period for cases. A total of 2,448 men were identified who met the eligibility criteria and 1,645 (67%) completed a study interview. Blood samples were drawn and DNA prepared from 1,352 (82%) interviewed controls.

### **IPO-Porto, Porto, Portugal**

The IPO-Porto prostate cancer study includes patients with clinically localized prostate adenocarcinoma consecutively diagnosed and treated with open radical prostatectomy at the Portuguese Oncology Institute – Porto, Portugal, since 1999. The project involves sample collection of peripheral blood, urine and fresh-frozen tumour tissue. Relevant clinical data, namely Gleason grading, clinico-pathological staging and PSA level at diagnosis, are obtained from medical records. After QC 183 cases and 66 controls of European ancestry were analysed.

### **MAYO, Rochester, Minnesota, US**

The Mayo Clinic study consisted of clinic-based cases, including 476 affected men from 185 families with prostate cancer, 445 men with sporadic prostate cancer, 199 with aggressive (Gleason score > 7) prostate cancer, and 500 population-based controls. The controls (all males) were randomly selected from a sampling frame of Olmsted County, Minnesota, provided by the Rochester Epidemiology Project. The methods used to ascertain familial and sporadic prostate cancer patients, as well as controls, have been described previously<sup>8</sup>. All individuals from the Mayo Clinic study included in this report were of self-reported European descent.

### **Cancer Council Victoria Prostate Cancer Program, Melbourne**

The Cancer Council Victoria's Prostate Cancer Program includes three studies: the Melbourne Collaborative Cohort Study (MCCS) and the prostate Cancer Family Study (PCFS). Cases and controls (and informative families) from these studies have been used for several stages of this research effort, beginning with the UK and Melbourne stage 2 GWAS.

The MCCS is a prospective cohort study that includes 17,154 men who were aged 40 and 69 years when recruited between 1990 and 1994. MCCS participants are regularly linked to the Victorian Cancer Registry and the Australian Cancer Database to ascertain incident cases (1582 by end of 2008) including men diagnosed in other states of Australia. A random sample of MCCS participants who were not diagnosed with prostate cancer during follow-up provides a control group.

The PCFS is a population-based family series of 1428 men diagnosed with prostate cancer before the age of 56 years and 256 men diagnosed after the age of 55 years who were recruited in Victoria between 1998 and 2010. Cases were ascertained using the population-based Victorian Cancer Registry, and family members were approached after gaining the consent of each case. Altogether, 77% of cases agreed to participate.

### **MEC: Multiethnic Cohort**

The Multiethnic Cohort Study is a population-based prospective cohort study that was initiated between 1993 and 1996 and includes subjects from various ethnic groups -African-Americans and

Latinos primarily from California (mainly Los Angeles) and Native Hawaiians, Japanese-Americans, and European Americans primarily from Hawaii. State drivers' license files were the primary sources used to identify study subjects in Hawaii and California. Additionally, in Hawaii, state voter's registration files were used, and, in California, Health Care Financing Administration (HCFA) files were used to identify additional African American men. All participants (n=215,251) returned a 26-page self-administered baseline questionnaire that obtained general demographic, medical and risk factor information. In the cohort, incident cancer cases are identified annually through cohort linkage to population-based cancer Surveillance, Epidemiology, and End Results (SEER) registries in Hawaii and Los Angeles County as well as to the California State cancer registry. Information on stage and grade of disease are also obtained through the SEER registries. Blood sample collection in the MEC began in 1994 and targeted incident prostate cancer cases and a random sample of study participants to serve as controls for genetic analyses. This nested prostate cancer case-control study in the MEC consists of 890 invasive prostate cancer cases and 895 controls. This study was approved by the Institutional Review Boards at the University of Southern California and at the University of Hawaii and informed consent was obtained from all study participants.

#### **MOFFITT: Moffitt Study, Tampa, Florida, US**

This is a hospital-based incident study of 638 patients with primary adenocarcinoma of the prostate. They were recruited from 2002 to 2009 at the H. Lee Moffitt Cancer Center (Tampa, FL, US) and James A. Haley Veterans Affairs Hospital (Tampa, FL, US). Ninety-five percent of the case subjects who were asked to participate in the study agreed. All cancer cases were histologically confirmed by the Department of Pathology at each institution. The controls consisted of 147 subjects who were visiting the Lifetime Cancer Screening Center, which is affiliated with the H. Lee Moffitt Cancer Center or VA hospital. All control subjects were male and had had no previous diagnosis of cancer. The control subjects were frequency matched to the patients by age at diagnosis ( $\pm 5$  years). Eighty-three percent of the control subjects who were asked to participate in the study consented. Non-genetic risk factor data for the present study were obtained through in-person interviews with the patients and controls at enrolment. The questionnaire covered demographic information, family history of cancer (i.e., whether they have one or more first-degree family member with prostate cancer), medical history, and detailed tobacco consumption. For the patients, data on cancer stage, Gleason score, and prostate specific antigen level were abstracted from the medical records. The subjects were asked to provide a blood or buccal sample after the interview as a source of genomic DNA.

#### **PCMUS: Bulgaria**

The Bulgarian sample of prostate cancer patients consist mainly of newly diagnosed cases, which are histopathologically confirmed. The patients (N=150, age range 39-93) are of Bulgarian origin. Transrectal biopsy was performed at the Urology Clinic, Alexandrovska University Hospital, mainly because of an elevated PSA. Some of the patients were referred from other centres to the tertiary university hospital after being previously diagnosed with prostate cancer. A small subset of patients had previously had definitive treatment (mainly radical prostatectomy) and they were called retrospectively with invitation to join the study. The control group is matched to the patients by sex, age, and ethnicity. It consists of two groups: (i) 72 healthy males, age range 54-87, presenting to our institution with lower urinary tract symptoms caused by benign prostatic hypertrophy (BPH) who had a PSA <3.5. The majority of them subsequently underwent surgical treatment with histological verification of the BPH; (ii) an additional healthy control group of 78 anonymous males matched to the prostate cancer patients by age and ethnicity, but with no PSA data.

## **POLAND**

Polish case-control series included 458 men with prostate cancer, diagnosed in north-western Poland between 1999 and 2009 at the University Hospital in Szczecin. Study participants were unselected for age and family history. The mean age of prostate cancer diagnosis was 68 years (range 41–90 years). The control group included 476 cancer-free adult men from the same population (age range, 24–89 years; mean 63.1) taken from the healthy adult patients of five family doctors practicing in the Szczecin region. These individuals were selected randomly from the patient lists of the participating doctors.

## **ProtecT/ ProMPT, UK**

The ProtecT<sup>9</sup> (Prostate testing for cancer and Treatment) trial is an NIHR-funded, UK-wide study of community-based PSA testing followed by a randomised controlled trial of prostate cancer treatment (radical surgery, radical conformal radiotherapy and active monitoring: ProMPT). Over 200,000 men between the ages of 50 and 69 years, ascertained through general practices in nine regions in the UK, were approached and over 100, 000 attended for PSA testing and, when PSA was 3.0ng/ml or more, for prostate cancer diagnosis. Over 95% of recruited men were of white ethnicity. For this study, after QC, 1563 cases identified by PSA screening within the ProtecT study were analysed. Controls with normal PSA levels (<3ng/ml) were selected from the same GP register and 5 year age band as the cases (n=1474 after QC were analysed).

## **QUEENSLAND: Australia**

Caucasian patients were accrued through the Queensland node of the Australian Prostate Cancer BioResource (APCB), where cases were recruited through local urologists at the time of diagnosis (n=186 after QC). All cases had histopathologically confirmed prostate cancer, following



presentation with an abnormal serum PSA and/or lower urinary tract symptoms. Controls comprised healthy male blood donors with no personal history of prostate cancer, were recruited through Queensland University of Technology from the Australian Electoral Commission (n= 87, age range 54-90 years).

### **The Southern Community Cohort Study (SCCS)**

The SCCS is a prospective cohort of African Americans and non-African Americans which during 2002-2009 enrolled over 85,000 residents aged 40-79 years across 12 southern states ([www.southerncommunitystudy.org](http://www.southerncommunitystudy.org))<sup>10</sup>. Recruitment occurred mainly at community health centers, institutions providing basic health services primarily to the medically uninsured, so that the cohort includes many adults of lower income and educational status. Each study participant completed a detailed baseline questionnaire, and nearly 90% provided a biologic specimen (approximately 45% a blood sample and 45% buccal cells). Follow-up of the cohort is conducted by linkage to national mortality registers and to state cancer registries. Included in this study are 545 African American prevalent and incident prostate cancer cases and 510 African American male controls.

### **SEARCH**

Prostate cancer cases were identified via the Eastern Cancer Registration and Information Centre, East Anglia, UK. Incident cases <70 years at diagnosis are recruited. Controls are men attending general practice who are frequency- matched to cases by age and geographic region.

### **STOCKHOLM: Sweden STHM1**

The Stockholm-1 (STHLM1) study invited men without a history of prostate cancer who had undergone prostate biopsy between 01.01.2005 and 31.12.2007 in the Stockholm area. In total, 7035 men were invited and 5241 (75%) consented to participate in the study by donating a blood sample and completing a questionnaire regarding life-style factors and family history of prostate cancer. Record linkage to the Regional Cancer Registry and the Stockholm part of the National Prostate Cancer Registry revealed information about incident prostate cancer cases in the cohort including tumour stage and grade of diseased men. For the present study DNA was available from a total of 2126 prostate cancer cases and 2403 unaffected men.

### **TAMPERE: Finland**

Total of 8744 Finnish samples were sent to for typing. Of these, 2960 unselected cases and 165 controls (PSA < 4 µg/ml) were collected in Tampere, Finland and all are of Finnish origin. The mean age of diagnosis was 68.7 years (range 36-94). The patients were diagnosed with prostate cancer in 1993-2008 in the Tampere University Hospital, Department of Urology. Tampere University Hospital is a regional referral center in the area for all patients with prostate cancer,

which results in an unselected, population-based collection of patients. The other unselected set of samples were 5522 samples collected in the Finnish arm of The European Randomized Study of Screening for Prostate Cancer, which was initiated in the early 1990s to evaluate the effect of screening with prostate-specific-antigen (PSA) testing on death rates from prostate cancer. This sample set includes 1106 Finnish cancer cases and 4416 controls. These men were born in years 1933, 1937 and 1941 and were randomly assigned to a group that was offered PSA screening at an average of once every 4 years or to a control group that did not receive such screening. In addition to these two sporadic sample sets, 97 familial cancer cases (mean age at diagnosis 70 years) from Finnish prostate cancer families were genotyped.

### **UKGPCS**

Blood DNA from prostate cancer cases was collected from cases throughout the UK aged  $\leq 60$  years at diagnosis and a systematic series from the prostate cancer clinic at The Royal Marsden NHS Foundation Trust. Diagnosis is confirmed from medical record or death certificate. 60% are clinically detected.

### **ULM: Germany**

Cases were recruited in two different ways. Familial prostate cancer probands (index cases) were ascertained from all over Germany. They were advised by their attending physicians to contact the Clinic of Urology of Ulm. The positive family history was then verified by reviewing medical records or death certificates of family members. In each case, only one member of each family (e.g. the proband) was enrolled in the present study. Sporadic cases, who reported no relatives affected with prostate cancer, were almost exclusively collected at Ulm during their course of treatment (e.g. radical prostatectomy) in our Urology Clinic. The control group consists of 213 age-matched healthy men and 295 population controls of unknown disease status.

### **UTAH, US**

All 455 prostate cancer cases were drawn from the set of sampled prostate cancer cases belonging to extended Utah high-risk pedigrees. All cases were selected to have kinship coefficients  $\leq 0.0156$  with any other case included from the high-risk pedigree set. The 256 controls were selected from other high-risk pedigree studies as: 1) not related to a prostate kindred, 2) not having cancer, 3) not having a first degree relative with prostate cancer.

### **WUGS: St. Louis, Missouri, US**

The Washington University Genetic Study is a prospective study designed to investigate both genetic and non-genetic risk factors for prostate cancer progression. A hospital-based series of 1901 patients with newly diagnosed prostate cancer, who were treated for prostate cancer

between August 2004 and August 2011. All patients had biopsy-proven adenocarcinoma of the prostate. From this cohort were selected 990 consecutively treated patients from August 2004-March 2010, with available blood DNA and environmental data.

## **UKGPCS, ProtecT and PRACTICAL co-authorship list**

### **The UK Genetic Prostate Cancer Study Collaborators**

|                         |                          |                         |
|-------------------------|--------------------------|-------------------------|
| Mr Z Abbasi,            | Mr Pradip Basu           | Dr Cathryn Brock        |
| Mr M Akhlil Abdul-Hamid | Mr Christopher A Bates   | Dr Sue Brock            |
| Mr Paul D Abel          | Dr N A Bax               | Mr Stephen Bromage      |
| Professor Paul H Abrams | Mr D Baxter-Smith        | Mr Richard Brough       |
| Dr Fawzi A Adab         | Mr Amar Bdesha           | Dr Richard Brown        |
| Mr Andrew Adamson       | Mr Christopher J M       | Mr Stephen Brown        |
| Mr A Adeyoju            | Beacock                  | Mr Richard Brown        |
| Mr Naveed Afzal         | Professor Ronald P       | Mr Tony J Browning      |
| Mr Ernest K N Ahiaku    | Beaney                   | Mr N Bryan              |
| Mr Munir Ahmed          | Mr Ralph Beard           | Mr Neil A Burgess       |
| Mr Mohammed L Al        | Mr John D Beatty         | Mr Nicholas Burns-Cox   |
| Sudani                  | Mr Rupert Beck           | Mr Paul C Butterworth   |
| Dr Christopher Alcock   | Ms Gail Beese            | Mr D Cahill             |
| Dr Zulfiqar Ali         | Dr Sharon Beesley        | Mr P S Callaghan        |
| Mr David J Almond       | Mr C Richard W Bell      | Mr John Calleary        |
| Dr Roberto Alonzi       | Mr James Bellringer      | Dr M Calleja            |
| Dr Amir S M Al-         | Dr Richard Benson        | Dr Frances Calman       |
| Samarraie               | Dr Beresford             | Dr Philip Camilleri     |
| Dr Al-Samerraie         | Mr Christopher R A Bevis | Mr Alister Campbell     |
| Mr Waleed Al-Singary    | Dr Rajanee Bhana         | Miss Andrea Cannon      |
| Mr Al-Sudani            | Mr S Bhanot              | Dr Dawn M Carnell       |
| Mr John Anderson        | Dr A Bhatnagar           | Mr T W Carr             |
| Mr Steven Andrews       | Mr R I Bhatt             | Mr Simon Carter         |
| Mr Henry Andrews        | Mr Brian Birch           | Mr Charles J M Carter   |
| Mr Iqbal Anjum          | Dr Alison Birtle         | Dr Adam C Carter        |
| Mr Ken Anson            | Mr M Bishop              | Dr Bruce M Castle       |
| Dr Nicola A Anyamene    | Mr C Shekhar Biyani      | Mr David Chadwick       |
| Mr Ike Apakama          | Mr A R E Blacklock       | Mr Rohit Chahal         |
| Dr F Aparcia            | Miss Rosemary Blades     | Dr P Chakraborti        |
| Mr J A A Archbold       | Dr Peter Bliss           | Mr Chappell             |
| Dr D Ash                | Dr David J Bloomfield    | Mr C Charig             |
| Dr Richard F U Ashford  | Miss S Boddy             | Dr Anula D              |
| Dr A Azzabi             | Professor C M Booth      | Chetiyawardana          |
| Mr David Badenoch       | Mr Pradeep Bose          | Mr Christopher Chilton  |
| Dr Amit Bahl            | Dr Michael C Bott        | Mr F I Chinegwundoh     |
| Mr M J Bailey           | Dr David Bottomley       | Dr Irene Chong          |
| Mrs Karen Bailey        | Mr Nigel R Boucher       | Dr Ananya Choudhury     |
| Mr Andrew J Ball        | Dr J Bowen               | Mr Wai-Man Chow         |
| Mr G Banerjee           | Dr Mark Bower            | Mr Timothy J Christmas  |
| Dr N Barber             | Mr W G Bowsher           | Dr Mark J Churn         |
| Dr Jim Barber           | Mr P J R Boyd            | Mr Noel W Clarke        |
| Dr Baria                | Mr F James Bramble       | Mr Jorge Clavijo-Eisele |
| Mr Douglas G Barnes     | Mr Simon F Brewster      | Dr M Coe                |
| Mr J Bashir             | Mr Tim Briggs            | Mr N P Cohen            |

Mr C Coker  
Dr Trevor Cole  
Dr David J Cole  
Mr O Cole  
Mr Gerald Collins  
Dr Matthew Collinson  
Mr I Conn  
Dr C Connell  
Dr Audrey Cook  
Mr Peter Cooke  
Mr Graeme Cooksey  
Mr L Coombs  
Mr Robert F Copland  
Mr Andrew J Cornaby  
Mr P A Cornford  
Mr Corolis  
Mr John Corr  
Mr C B Costello  
Mrs N Coull  
Dr Richard Cowan  
Mr Robert Cox  
Dr C Coyle  
Mr Jeremy Crew  
Mr John C Crisp  
Dr W Cross  
Mr W Cross  
Dr Dorthe Cruger  
Mr Malcolm Crundwell  
Mr Cummings  
Mr Nazeer Dahar  
Dr Francis N Daniel  
Mr J Darrad  
Mr Pallon Daruwala  
Mr Gautam Das  
Mr Shibendra Datta  
Dr S Davidson  
Dr Joseph Davies  
Mr Owen W Davison  
Mr Guy Dawkins  
Mr Chris Dawson  
Mr Alan R De Bolla  
Professor David  
Dearnaley  
Mr Ken M Desai  
Dr George P Deutsch  
Mr John Dick  
Mr Andrew J Dickinson  
Dr Jeanette Dickson  
Mr Michael Dinneen  
Dr Sanjay Dixit  
Dr H Jane Dobbs  
Mr A Doble  
Dr David Dodds  
Mr Alan Doherty  
Mr P Donaldson

Dr M Dooldeniya  
Dr S Fiona Douglas  
Mr Drake  
Dr Gill M Duchesne  
Mr Peter Duffy  
Mr Michael Dunn  
Mr W D Dunsmuir  
Dr Sajid K Durrani  
Mr Alan C Eaton  
Professor Diane Eccles  
Mr B Eddy  
Mr C D Eden  
Mr J Edwards  
Mr Jeremy Elkabir  
Dr P Tony Elliott  
Mr B W Ellis  
Dr R Ellis  
Dr A El-Modir  
Mr Andrew W S Elves  
Dr Christine Elwell  
Mr Mark Emberton  
Dr Louise Emmerson  
Mr Roland C D England  
Mr R D Errington  
Professor D Gareth  
Evans  
Dr Alison Falconer  
Mr Derek Fawcett  
Dr C Featherston  
Dr Carolyn J  
Featherstone  
Mr Jeremy Feggetter  
Dr C Ferguson  
Dr D Fermont  
Mr Michael Ferro  
Mr Matthew Fletcher  
Dr A Folkes  
Mr Trevor F Ford  
Mr Paul W Foster  
Dr Kevin N Franks  
Dr Olivera Frim  
Dr Joanna Gale  
Mr Christopher Gallegos  
Mr James S Gelister  
Dr Ghana  
Dr Stephanie Gibbs  
Mr Hugh Gilbert  
Mr David Gillatt  
Dr John Glaholm  
Mr Jonathan M Glass  
Mr James Glenister  
Dr Thomas D Goode  
Ms E M Gordon  
Mr Richard L Gower  
Dr John Graham

Mr Damian Green  
Mr Jonathan Greenland  
Dr Robert Grieve  
Mr Thomas R L Griffiths  
Mr Sandy Gujral  
Dr Nishi Gupta  
Mr Riza Murat Gurun  
Mr Peter J Guy  
Mr Neil Haldar  
Mr N Halder  
Professor F C Hamdy  
Dr C Hamilton  
Mr John Hammonds  
Mr S J Hampson  
Mr Damien C Hanbury  
Dr P D John Hardman  
Dr Stephen J Harland  
Mr John M Harney  
Dr Peter Harper  
Dr Sarah Harris  
Mr D Harris  
Mr G S M Harrison  
Mr D R Harriss  
Mr N Harvey-Hills  
Mr Simon Hawkyard  
Dr Catherine M Heath  
Mr Michael Hehir  
Mr Giles O Hellowell  
Mr David Hendry  
Mr Mike Henley  
Dr Ann Henry  
Dr John Hetherington  
Dr Tamas Hickish  
Mr James A Hicks  
Dr Serena Hilman  
Mr Richard Hindley  
Mr John R Hindmarsh  
Mr John Hines  
Dr M Hingorani  
Mr Edwin T S Ho  
Professor Shirley  
Hodgson  
Dr U Hoffman  
Mr David Holden  
Dr A Hollingdale  
Mr Graham W Hollins  
Mr Simon A V Holmes  
Dr Gail Horan  
Professor Alan Horwich  
Professor Peter Hoskin  
Mr Graham P Howell  
Mr D Hrouda  
Dr Robert Huddart  
Ms Liz Hudson  
Dr Rob Hughes

Mr Michael Hughes  
Mr Owen Hughes  
Dr Caroline Humber  
Mr John W Iacovou  
Dr A Ibrahim  
Mr John A Inglis  
Mr Stuart Irving  
Mr C Irwin  
Dr Louise Izatt  
Mr Victor Izegbu  
Mr Basharat Jameel  
Mr Michael J James  
Professor N James  
Mr R Lester James  
Mr Pradip Javle  
Dr P Jenkins  
Dr Sameer Jhavar  
Dr Gareth Jones  
Mr Chris R Jones  
Dr David A Jones  
Mr J Joseph  
Dr Shelagh Joss  
Mr Amir Kaisary  
Dr Alexandre L Kaliski  
Dr G Kapur  
Mr O Karim  
Dr Stephen J Karp  
Mr F X Keeley  
Mr Anand R Kelkar  
Mr J P Kelleher  
Mr John Kelly  
Dr Sue Kenwick  
Mr F Khan  
Dr Vincent Khoo  
Ms Rachel M Kimber  
Mr R Kinder  
Professor Roger S Kirby  
Professor David Kirk  
Dr Peter Kirkbride  
Mr Magdi M Kirillos  
Mr Roger Kockelbergh  
Mr Philip C W C Koenig  
Mr Gordon G Kooiman  
Dr O Koreich  
Mr Anthony Koupparis  
Mr Mohamed Kourah  
Dr Sigurd Kraus  
Ms Magda L Kujawa  
Mr Ravi Kulkarni  
Mr M Kumar  
Dr Ian H Kunkler  
Professor H Kynaston  
Dr Katherine L Lachlan  
Dr Robert Laing  
Dr Fiona Laloo

Mr M Lancashire  
Mr Stephen E M Langley  
Mr Marc Laniado  
Mr T R Lerner  
Mr Maurice W Lau  
Mr W T Lawrence  
Miss Anne Lawson  
Mr Pieter J Le Roux  
Professor Mary Leader  
Mr J O Lee  
Ms L Lee  
Ms A Lee  
Dr R John Lemburger  
Dr Priscilla Leone  
Dr Jason Lester  
Mr Hing Leung  
Mr J Lewis  
Mr D Christopher Lewis  
Mr Thomas Liston  
Dr Jacqueline Livsey  
Mr S Lloyd  
Dr Imogen Locke  
Mr Richard Lodge  
Dr John Logue  
Mr Mark Longmuir  
Mr Malcolm G Lucas  
Mr C J Luscombe  
Dr Anna Lydon  
Mr Michael Lynch  
Mr Naing N K Lynn  
Mr James P A  
MacDermott  
Mr Ruairaidh P  
Macdonagh  
Mr Macdonald  
Mr Sanjeev Madaan  
Dr Kudingila R Madhava  
Dr Joseph Maguire  
Professor E R Maher  
Dr Rana Mahmood  
Dr Graeme H M Mair  
Mr Peter R Malone  
Dr Stephen A Mangar  
Mr Mark Mantle  
Mr I Mark  
Mr Robert Mason  
Professor M D Mason  
Mr Matanhelia  
Mr Shyam Matenhelia  
Mr Philip N Matthews  
Dr J McAleese  
Ms Donna McBride  
Mr Jonathan McFarlane  
Mr McGrath  
Mr Craig McIlhenny

Mr Paul McInerney  
Mr Gregor McIntosh  
Dr F McKinna  
Dr Duncan McLaren  
Miss Esther McLarty  
Dr Rhona McMenemin  
Mr Alan McNeill  
Mr T A McNicholas  
Mr Robert N Meddings  
Mr A David Mee  
Dr Lucinda Melcher  
Mr Memon  
Mr Pravin Menzes  
Mr Marek Miller  
Mr Robert Mills  
Mr S Mitchell  
Dr Natasha Mithal  
Dr Anita Mitra  
Ms Gillian E Mobb  
Mr Leslie E F Moffat  
Mr Mokete  
Dr Julian Money-Kyrle  
Mr Bruce Montgomery  
Mr Martin P Moody  
Mr Roland Morley  
Mr Sean B Morris  
Professor Patrick  
Morrison  
Dr Diana Mort  
Mr Amir H Mostafid  
Mr Hanif Motiwala  
Mr Gulzar Mufti  
Mr Gordon Muir  
Mr Faiz Mumtaz  
Mr Michael Murphy  
Mr Keith W Murray  
Dr Alexandra Murray  
Dr Shirley Murrell  
Dr D Muthukumar  
Mr Harry Naerger  
Mr Siva Namasivayam  
Mr Vinod Nargund  
Mr Nawrocki  
Mr Donald Neilson  
Dr A Nethersell  
Mr Julian Barwell  
Dr Jacqueline C Newby  
Dr Hugh Newman  
Dr R Newton  
Mr Neil Oakley  
Mr P J O'Boyle  
Mr J O'Brien  
Mr Tim S O'Brien  
Dr H O'Donnell  
Mr Neil O'Donoghue

Mr E O'Donoghue  
Mr Chris Ogden  
Mr Hemant Ohja  
Professor Tim Oliver  
Mr Eng K Ong  
Mr P O'Reilly  
Dr J S O'Rourke  
Mr David Osborn  
Dr Peter Ostler  
Professor Joe O'Sullivan  
Dr J Owen  
Mr Edward Palfrey  
Dr Miguel Panades  
Dr Niki Panakis  
Mr M Pancharatnam  
Mr Michalakakis L  
Pantelides  
Dr U Panwar  
Dr Omi Parikh  
Dr Chris Parker  
Mr Christopher H Parker  
Mr Bohdan T Parys  
Dr Sarah Pascoe  
Mr Anup Patel  
Dr Joan Paterson  
Mr S Pathack  
Ms Jhumur Pati  
Dr Helen Patterson  
Dr Pattu  
Mr A Paul  
Dr Heather Payne  
Dr David Peake  
Dr I Pedley  
Mr A Pengelly  
Mr Amjad M Peracha  
Dr Matthew Perry  
Mr Raj Persad  
Mr John Peters  
Mr N H Philp  
Mr T Philp  
Dr Lisa M Pickering  
Dr Katharine Pigott  
Mr R Plail  
Dr P Nicholas Plowman  
Mr Richard D Pocock  
Mr A J Pope  
Mr Rick Popert  
Mr Tim Porter  
Mr John M Potter  
Mr Christopher Powell  
Dr Thomas B Powles  
Mr Krishna Prasad  
Mr Seshadri Sri Prasad  
Mr J W Prejbisz  
Mr Stephen Prescott

Dr Andrew Protheroe  
Mr Khaver N Qureshi  
Dr Nigel Raby  
Dr Narasimhan Ragavan  
Mr Palaniappa G S Raju  
Dr Prakash B  
Ramachandra  
Dr R Raman  
Mr Abhay Rane  
Dr Julia Rankin  
Mr Y Rao  
Mr Hari L Ratan  
Mr Ramachandran Ravi  
Dr K Ravishankar  
Dr Read  
Mr Paul J Reddy  
Mr Peter R Rimington  
Dr Peter A Ritchie  
Dr J Trevor Roberts  
Mr Andrew Robertson  
Dr Angus Robinson  
Dr Anne C Robinson  
Mr Lee Q Robinson  
Mr Mark A Rochester  
Mr P B Rogers  
Mr Tomas P Rosenbaum  
Mr Neil Rothwell  
Mr Carl Rowbotham  
Mr Rowe  
Dr Kathryn Rowley  
Dr Deborah Ruddy  
Mr John Rundle  
Dr John M Russell  
Mr P G Ryan  
Dr A Sabharwal  
Dr Anand K Saggarr  
Dr Ali Samanci  
Mr Vijay K Sangar  
Mr M F Saxby  
Mr Hartwig Schwaibold  
Dr John E Scoble  
Dr Christopher Scrase  
Mr Selim  
Mr Henry Sells  
Mr Krishna K Sethia  
Mr David C Shackley  
Dr Shaffer  
Dr Nihil Shah  
Dr D Shakespeare  
Dr Sue Shanley  
Mr Neerah K Sharma  
Dr Denise J Sheehan  
Dr Elizabeth Sherwin  
Dr Poh Lin Shum  
Dr LucySide

Dr Norma Sidek  
Professor Karol Sikora  
Dr R Simcock  
Mr Andrew M Sinclair  
Mr Pravin Singh  
Dr M Siva  
Mr Michael F Smith  
Mr James Smith  
Dr Michael Sokal  
Mr Graham M Sole  
Mr Mark J Speakman  
Dr Alexander Spiers  
Dr Thiagarajan  
Sreenivasan  
Dr Narayanan N Srihari  
Mr Srinivasan  
Mr Rajagopalan Sriram  
Dr John N Staffurth  
Dr D Stewart  
Dr Andrew Stockdale  
Mr Mark A Stott  
Mr M J Stower  
Mr John R Strachan  
Professor Nicholas S A  
Stuart  
Dr Elaine Sugden  
Mr Duncan Summerton  
Dr Santhanam Sundar  
Mr S K Sundaram  
Mr Gokarakonda Suresh  
Mr Shabbir Susnerwala  
Mr Kuchibhotla S Swami  
Miss Stephanie J  
Symons  
Dr Isabel Syndikus  
Dr Saad Tahir  
Dr J Tanquay  
Dr John W Taylor  
Dr J W Taylor  
Mr T Terry  
Dr Robert J Thomas  
Mr Stephen A Thomas  
Mr Alan Thompson  
Dr Alastair H Thomson  
Dr A Thurston  
Dr Owen Tilsley  
Mr Stuart F Tindall  
Dr K Tipples  
Dr Tong  
Mr Hamid Toussi  
Dr Elizabeth W Toy  
Professor Richard C  
Trembath  
Mr David N Tulloch  
Mr Kevin J Turner

Mr James Tweedle  
Dr C J Tyrell  
Mr N Umez-Eronini  
Mr Graeme H Urwin  
Mr Justin A Vale  
Dr Van As  
Dr Nicholas Van As  
Dr Subramaniam  
Vasanthan  
Mr Sean Vesey  
Dr Maria Vilarino-Varela  
Dr John Violet  
Mr Jaspal Virdi  
Dr Robert Wade  
Dr Katherine Waite  
Mr E M Walker  
Mr Roger Walker  
Mr David M A Wallace

Mr Nicholas A Watkin  
Mr M E Watson  
Professor J H Waxman  
Mr Brian Waymont  
Dr Andrew Weaver  
Mr Ralph J Webb  
Mr Andrew Wedderburn  
Dr Paula Wells  
Mr G D Wemyss-Holden  
Mr P M T Weston  
Dr Duncan Wheatley  
Mr P Whelan  
Dr D Whillis  
Mr Adam D Wilde  
Dr Vicki Wiles  
Dr Marie Wilkins  
Mr John H Williams  
Mr Simon Williams

Mr Michael Willis  
Mr Michael I Wills  
Mr Richard Wilson  
Mr J R Wilson  
Mr Mathias H Winkler  
Dr Marcus Wise  
Mr Simon Woodhams  
Professor C Woodhouse  
Dr Cathryn Woodward  
Dr Woolf  
Mr K A Woolfenden  
Dr Jane Worlding  
Mr Mark Wright  
Dr James P Wylie  
Dr Chris Wynne  
Ms Angelika Zang  
Dr A Zarkar

### **The UK ProtecT Study Collaborators**

Prasad Bollina, Sue Bonnington, Lynne

Bradshaw, James Catto, Debbie Cooper, Liz Down, Andrew Doble, Alan

Doherty, Garrett Durkan, Emma Elliott, David Gillatt, Pippa Herbert,

Peter Holding, Joanne Howson, Mandy Jones, Roger Kockelbergh, Rajeev Kumar, Peter Holding,

Howard Kynaston, Athene Lane, Teresa Lennon, Norma Lyons, Hing Leung, Malcolm Mason,

Hilary Moody, Philip Powell, Alan Paul, Stephen Prescott, Derek Rosario, Patricia O'Sullivan,

Pauline Thompson, Lynne Bradshaw, Sarah

Tidball.

### **THE BPC3 and PRACTICAL CONSORTIUM (in addition to those named in the author list)**

#### **UK Genetic Prostate Cancer Study and The Prostate Cancer Research Foundation Study**

#### **The Institute of Cancer Research & The Royal Marsden NHS Foundation Trust, Sutton UK**

Stephen Edwards

Cyril Fisher

Charles Jameson

Elizabeth Page

#### **The ProtecT Study**

Paul M. Brown

Anne George

Gemma Marsden

Athene Lane

Michael Davis

The UK ProtecT Study Collaborators – as above

**CAPS SWEDEN**

Jan Adolfson

Pär Stattin

Jan-Erik Johansson

**AUSTRALIA (Melbourne)**

John Pedersen

**AUSTRALIA (Queensland)**

Australian Prostate Cancer Bio Resource-QLD node:

Peter Heathcote

Glenn Wood

Greg Malone

Pamela Saunders

Allison Eckert

Trina Yeadon

Kris Kerr

Angus Collins

Megan Turner

**Australian Prostate Cancer Research Centre-Qld, Institute of Health and Biomedical Innovation, Queensland, University of Technology, Brisbane, Australia:**

Srilakshmi Srinivasan

Mary-Anne Kedda

Kimberly Alexander

Tracy O'Mara

**BULGARIA PCMUS study**

**Medical University – Sofia,**

Department of Urology

Elenko Popov

Molecular Medicine Center and Department of Chemistry and Biochemistry



Darina Kachakova  
Atanaska Mitkova  
Teodora Goranova  
Gergana Stancheva  
Olga Beltcheva  
Rumyana Dodova

Department of General and Clinical Pathology  
Aleksandrina Vlahova  
Tihomir Dikov  
Svetlana Christova

## **DENMARK**

CPCS1

Department of Urology, Herlev Hospital, Copenhagen University Hospital,  
Herlev, Denmark

CPCS2

Prof. DMSc Peter Iversen. Department of Urology, Rigshospitalet,  
Copenhagen University Hospital, Copenhagen, Denmark

## **GERMANY**

### **EPIC-BPC3**

Department of Epidemiology and Biostatistics, School of Public Health, Imperial College, London,  
United Kingdom

Hans Wallinder,  
Sven Gustafsson

### **ESTHER**

Saarland Cancer Registry, Saarbrücken, Germany  
Christa Stegmaier

### **Ulm**

Department of Urology, University Hospital Ulm, Germany  
Manuel Luedeke  
Mark Schrader

Institute of Human Genetics, University Hospital Ulm, Germany  
Josef Hoegel

Department of Urology, Technical University Munich, Germany  
Kathleen Herkommer

## **PORTUGAL**

### **IPO-Porto Study**

Department of Pathology, Portuguese Oncology Institute, Porto, Portugal  
Rui Henrique

Department of Genetics, Portuguese Oncology Institute, Porto, Portugal

Carmen Jerónimo

Pedro Pinto

Joana Santos

João D. Barros-Silva

## **SWEDEN**

### **CAPS**

Carin Cavalli-Björkman,

Ami Rönnerberg Karlsson,

Michael Broms

## **FINLAND**

The Finnish Cancer Registry

Liisa Määtänen

## **MAYO**

Lori Tillmans

Shaun Riska

Liang Wang

## **MEC-BPC3**

Department of Preventive Medicine, Keck School of Medicine, University of Southern California,  
Los Angeles, CA, USA:

Stram Dan

Epidemiology Program, University of Hawaii Cancer Center, Department of Medicine, John A. Burns School of Medicine, University of Hawaii, Honolulu, HI, USA:

Kolonel Laurence N.

## **MOFFIT**

Julio Pow-Sang

Hyun Y. Park

Selina Radlein

Maria Rincon

James A Haley VA Hospital, Tampa, FL, USA

Babu Zachariah

**The COGS-Cancer Research UK GWAS-ELLIPSE (part of GAME-ON) Initiative** This is the prostate component of these initiatives

## **ACKNOWLEDGEMENTS**

This work was supported by European Commission's Seventh Framework Programme grant agreement n° 223175 (HEALTH-F2-2009-223175), Cancer Research UK Grants C5047/A7357, C1287/A10118, C5047/A3354, C5047/A10692, C16913/A6135, and The National Institute of Health (NIH) Cancer Post-Cancer GWAS initiative grant: No. 1 U19 CA 148537-01 (the GAME-ON initiative).

BPC3: This work was supported by the U.S. National Institutes of Health, National Cancer Institute [cooperative agreements U01-CA98233-07 to David J. Hunter, U01-CA98710-06 to Susan M. Gapstur, U01-CA98216-06 to Elio Riboli and Rudolf Kaaks, and U01-CA98758-07 to Brian E. Henderson, and Intramural Research Program of NIH/National Cancer Institute, Division of Cancer Epidemiology and Genetics].

CAPS: we would like to thank all urologists and other persons involved in the planning, coordination, and data collection of the CAPS study.

We would also like to thank the following for funding support: The Institute of Cancer Research and The Everyman Campaign, The Prostate Cancer Research Foundation, Prostate Research Campaign UK (now Prostate Action), The Orchid Cancer Appeal, The National Cancer Research

Network UK, The National Cancer Research Institute (NCRI) UK. We are grateful for support of NIHR funding to the NIHR Biomedical Research Centre at The Institute of Cancer Research and The Royal Marsden NHS Foundation Trust.

The FHCRC, Mayo, MCCS, Tampere, UKGPCS and Ulm groups are part of the ICPCG supported by NIH Grant No. U01 CA089600-04.

The Prostate Cancer Program of Cancer Council Victoria also acknowledge grant support from The National Health and Medical Research Council, Australia (126402, 209057, 251533, , 396414, 450104, 504700, 504702, 504715, 623204, 940394, 614296.), VicHealth, Cancer Council Victoria, The Prostate Cancer Foundation of Australia, The Whitten Foundation, PricewaterhouseCoopers, and Tattersall's. EAO, DMK, and EMK acknowledge the Intramural Program of the National Human Genome Research Institute for their support.

The QLD research is supported by The National Health and Medical Research Council, Australia Project Grant [390130, 1009458] and Enabling Grant [614296 to APCB]; the Prostate Cancer Foundation of Australia (Project Grant [PG7] and Research infrastructure grant [to APCB]).

We would like to acknowledge the support of The University of Cambridge, Cancer Research UK. Cancer Research UK grants [C8197/A10123] and [C8197/A10865] supported the genotyping team. We would also like to acknowledge the support of the National Institute for Health Research which funds the Cambridge Bio-medical Research Centre, Cambridge, UK. We would also like to acknowledge the support of the National Cancer Research Prostate Cancer: Mechanisms of Progression and Treatment (PROMPT) collaborative (grant code G0500966/75466) which has funded tissue and urine collections in Cambridge.

We are grateful to staff at the Wellcome Trust Clinical Research Facility, Addenbrooke's Clinical Research Centre, Cambridge, UK for their help in conducting the ProtecT study. We also acknowledge the support of the NIHR Cambridge Biomedical Research Centre, the DOH HTA (ProtecT grant) and the NCRI / MRC (ProMPT grant) for help with the bio-repository. The UK Department of Health funded the ProtecT study through the NIHR Health Technology Assessment Programme (projects 96/20/06, 96/20/99). The ProtecT trial and its linked ProMPT and CAP (Comparison Arm for ProtecT) studies are supported by Department of Health, England; Cancer Research UK grant number C522/A8649, Medical Research Council of England grant number G0500966, ID 75466 and The NCRI, UK. The epidemiological data for ProtecT were generated though funding from the Southwest National Health Service Research and Development. DNA extraction in ProtecT was supported by USA Dept of Defense award W81XWH-04-1-0280,

Yorkshire Cancer Research and Cancer Research UK. The authors would like to acknowledge the contribution of all members of the ProtecT study research group. The views and opinions expressed therein are those of the authors and do not necessarily reflect those of the Department of Health of England. The bio-repository from ProtecT is supported by the NCRI (ProMPT) Prostate Cancer Collaborative and the Cambridge BMRC grant from NIHR.

We should like to acknowledge the NCRN nurses, data managers and Consultants for their work in the UKGPCS study.

The CGEMS and PLCO studies were funded by the Intramural Research Program of the Division of Cancer Epidemiology and Genetics, National Cancer Institute, NIH.

The Mayo group was supported by the US National Cancer Institute (R01CA72818).

The MEC was support by NIH grants CA63464, CA54281 and CA098758.

The Moffitt group was supported by the US National Cancer Institute (R01CA128813, PI: J.Y. Park).

The USC study was supported by the US National Cancer Institute (R01CA84979) and by the California Cancer Research Program (99-00524V-10258).

The San Francisco Bay Area Prostate Cancer Study was supported by the California Cancer Research Fund (99-00527V-10182).

The Tampere (Finland) study was supported by the Academy of Finland Grant 116437 and 126714, The Finnish Cancer Organisations, Sigrid Juselius Foundation, Reino Lahtikari Foundation and The Medical Research Fund of Tampere University Hospital (# 9L091). The PSA screening samples were collected by the Finnish part of ERSPC (European Study of Screening for Prostate Cancer). Linda Enroth is thanked for technical assistance. Riitta Vaalavuo and Liisa Määttänen are thanked for their work with databases.

The FHCRC studies were supported by grants RO1 CA056678, RO1 CA082664, and RO1 CA092579 from the National Cancer Institute, National Institutes of Health, with additional support from the Fred Hutchinson Cancer Research Center. Genotyping was supported by the Intramural Program of the National Human Genome Research Institute, National Institutes of Health.

The Department of Medical Epidemiology and Biostatistics, Karolinska Institute, Stockholm, Sweden was supported by the Cancer Risk Prediction Center (CRiSP; [www.crispcenter.org](http://www.crispcenter.org)), a Linneus Centre (Contract ID 70867902) financed by the Swedish Research Council, Swedish Research Council (grant no K2010-70X-20430-04-3), the Swedish Cancer Foundation (grant no 09-0677), the Hedlund Foundation, the Söderberg Foundation, the Enqvist Foundation, ALF funds from the Stockholm County Council. Stiftelsen Johanna Hagstrand och Sigfrid Linnér's Minne, Karlsson's Fund for urological and surgical research. We thank and acknowledge all of the participants in the Stockholm-1 study. We thank Carin Cavalli-Björkman and Ami Rönnberg Karlsson for their dedicated work in the collection of data. Michael Broms is acknowledged for his skilful work with the databases. KI Biobank is acknowledged for handling the samples and for DNA extraction. Hans Wallinder at Aleris Medilab and Sven Gustafsson at Karolinska University Laboratory are thanked for their good cooperation in providing historical laboratory results.

The PCMUS study was supported by the Bulgarian National Science Fund, Ministry of Education, Youth and Science (contract DOO-119/2009) with additional support from the Science Fund of Medical University - Sofia (contract 51/2009; 8I/2009).

SCCS is funded by NIH grant R01 CA092447, and SCCS sample preparation was conducted at the Epidemiology Biospecimen Core Lab that is supported in part by the Vanderbilt-Ingram Cancer Center (P30 CA68485). Data on SCCS cancer cases used in this publication were provided by the Alabama Statewide Cancer Registry; Kentucky Cancer Registry, Lexington, KY; Tennessee Department of Health, Office of Cancer Surveillance; Florida Cancer Data System; North Carolina Central Cancer Registry, North Carolina Division of Public Health; Georgia Comprehensive Cancer Registry; Louisiana Tumor Registry; Mississippi Cancer Registry; South Carolina Central Cancer Registry; Virginia Department of Health, Virginia Cancer Registry; Arkansas Department of Health, Cancer Registry, 4815 W. Markham, Little Rock, AR 72205. The Arkansas Central Cancer Registry is fully funded by a grant from National Program of Cancer Registries, Centers for Disease Control and Prevention (CDC). Data on SCCS cancer cases from Mississippi were collected by the Mississippi Cancer Registry which participates in the National Program of Cancer Registries (NPCR) of the Centers for Disease Control and Prevention (CDC). The contents of this publication are solely the responsibility of the authors and do not necessarily represent the official views of the CDC or the Mississippi Cancer Registry.

The Keith and Susan Warshaw Fund, C. S. Watkins Urologic Cancer Fund and The Tennity Family Fund supported the Utah study. The project was supported by Award Number P30CA042014 from the National Cancer Institute.

The ESTHER study was supported by a grant from the Baden-Württemberg Ministry of Science, Research and Arts.

The authors would like to acknowledge the contribution of the entire staff of the genotyping unit under the supervision of Dr. Sylvie LaBoissière as well as Frédérick Robidoux from the McGill University and Génome Québec Innovation Centre.

John Hopper is an Australia Fellow of the NHMRC. A. Spurdle is an NHMRC Senior Research Fellow, J. Clements is an NHMRC Principal Research Fellow, and J. Batra is an NHMRC Training Fellow.

We should like to thank all the patients and control men who took part in this study.

### **Reference List**

1. Eeles,R.A. *et al.* Multiple newly identified loci associated with prostate cancer susceptibility. *Nat. Genet.* **40**, 316-321 (2008).
2. Eeles,R.A. *et al.* Identification of seven new prostate cancer susceptibility loci through a genome-wide association study. *Nat. Genet.* **41**, 1116-1121 (2009).
3. Schumacher,F.R. *et al.* Genome-wide association study identifies new prostate cancer susceptibility loci. *Hum. Mol. Genet.*(2011).
4. Yeager,M. *et al.* Genome-wide association study of prostate cancer identifies a second risk locus at 8q24. *Nat. Genet.* **39**, 645-649 (2007).
5. Zheng,S.L. *et al.* A comprehensive association study for genes in inflammation pathway provides support for their roles in prostate cancer risk in the CAPS study. *Prostate* **66**, 1556-1564 (2006).
6. Riboli,E. *et al.* European Prospective Investigation into Cancer and Nutrition (EPIC): study populations and data collection. *Public Health Nutr.* **5**, 1113-1124 (2002).
7. FitzGerald,L.M. *et al.* Sequence variants of alpha-methylacyl-CoA racemase are associated with prostate cancer risk: a replication study in an ethnically homogeneous population. *Prostate* **68**, 1373-1379 (2008).
8. Schaid,D.J., McDonnell,S.K., Blute,M.L., & Thibodeau,S.N. Evidence for autosomal dominant inheritance of prostate cancer. *Am. J. Hum. Genet.* **62**, 1425-1438 (1998).
9. Donovan,J. *et al.* Prostate Testing for Cancer and Treatment ( ProtecT) feasibility study. *Health Technol. Assess.* **7**, 1-88 (2003).
10. Signorello,L.B., Hargreaves,M.K., & Blot,W.J. The Southern Community Cohort Study: investigating health disparities. *J. Health Care Poor Underserved* **21**, 26-37 (2010).
